# Supplementary material for: Exploring biomedical ontology mappings with graph theory methods
Source: PeerJ. 2017 Mar 2;5:e2990. doi: 10.7717/peerj.2990 (PMC5337086; doi:10.7717/peerj.2990)
Supplement: Supplemental Information 1 — Mappings between pairs of ontologies for different versions of graphs. [file peerj-05-2990-s001.xlsx]

## Sheet: Oct12
Source	Target	Weight
MA	BTO	465
MA	CL	8
MA	DOID	1
MA	EV	700
MA	FBbt	57
MA	EHDAA	347
MA	EHDA	1576
MA	LHN	2
MA	MP	87
MA	MAO	1
MA	MFO	55
MA	IMR	1
MA	TGMA	15
MA	NCIt	4393
MA	ProPreO	1
MA	MI	1
MA	WBbt	35
MA	ZEA	2
MA	ZFA	383
MA	pro-ont	1
MA	FMA	881
MA	GALEN	684
MA	basic-vertebrate-gross-anatomy	18
MA	RID	859
MA	CPR	1
MA	SOPHARM	3
MA	PR	4
MA	CARO	1
MA	FBsp	1
MA	TADS	1
MA	SAO	4
MA	ENVO	19
MA	GO	2
MA	TTO	1
MA	GRO	1
MA	NPO	1
MA	nif	227
MA	birnlex	149
MA	AAO	193
MA	SPD	19
MA	IDO	1
MA	XAO	178
MA	ATMO	1
MA	BOOTStrep	1
MA	PATO	4
MA	PO_PAE	7
MA	TAO	232
MA	UO	1
MA	BILA	21
MA	BHO	31
MA	SPO	6
MA	OBI	15
MA	HP	1
MA	ACGT	61
MA	NCBITaxon	11
MA	BT	4
MA	EFO	361
MA	EP	6
MA	DC_CL	27
MA	ECG	4
MA	MAT	155
MA	VO	5
MA	OPL	13
MA	MCCL	1222
MA	ABA	74
MA	BCGO	3
MA	IDOMAL	2
MA	CLO	1
MA	NEMO	21
MA	CST	53
MA	HL7	22
MA	ICPC	1
MA	MEDLINEPLUS	10
MA	OMIM	29
MA	PDQ	2
MA	LNC	380
MA	MSH	568
MA	NDFRT	2
MA	SNOMEDCT	1764
MA	HAO	41
MA	NIF_Dysfunction	6
MA	GAZ	6
MA	ICNP	56
MA	NIF_Cell	6
MA	UBERON	5332
MA	TEDDY	1
MA	ICF	37
MA	FLU	3
MA	MDR	6
MA	RXNORM	1
MA	NDDF	6
MA	RCD	736
MA	AIR	3
MA	MCBCC	9
MA	GFO-Bio	1
MA	CHEMINF	2
MA	TMO	1
MA	bodysystem	14
MA	pma	44
MA	NeoMarkOntology	1
MA	CPT	1
MA	OMIT	8
MA	CCO	3
MA	ICD10	122
MA	EHDAA2	318
MA	NeuMORE	1
MA	oboe-sbc	3
MA	CSP	362
MA	VANDF	4
MA	HCPCS	2
MA	ADW	1
MA	SIO	2
MA	BAO	14
MA	IDOBRU	5
MA	DDI	1
MA	PHARE	4
MA	ICD10CM	9
MA	VSAO	32
MA	CogPO	1
MA	PVOnto	1
MA	AEO	28
MA	HPIO	9
MA	vHOG	469
MA	ExO	3
MA	OntoOrpha	1
MA	PO	7
MA	BDO	9
MA	OntoDM	1
MA	PedTerm	15
MA	SDO	81
MA	SHR	4
MA	NeoMark	1
MA	ERO	2
MA	RH-MESH	788
MA	BioModels	944
MA	CanCO	425
MA	PFO	2
BTO	MA	465
BTO	CL	482
BTO	DDANAT	4
BTO	DOID	7
BTO	EV	941
BTO	FBbt	169
BTO	FBdv	3
BTO	FAO	24
BTO	EHDAA	588
BTO	EHDA	2220
BTO	LHN	2
BTO	MP	5
BTO	MFO	64
BTO	TGMA	35
BTO	MPATH	3
BTO	NCIt	1478
BTO	MI	1
BTO	WBbt	65
BTO	WBls	3
BTO	ZEA	42
BTO	ZFA	347
BTO	GALEN	508
BTO	basic-vertebrate-gross-anatomy	14
BTO	RID	562
BTO	SOPHARM	10
BTO	PR	4
BTO	CARO	2
BTO	FBsp	3
BTO	TADS	2
BTO	SAO	46
BTO	ENVO	25
BTO	GO	37
BTO	TTO	2
BTO	GRO	3
BTO	NPO	1
BTO	nif	289
BTO	birnlex	144
BTO	AAO	215
BTO	SPD	24
BTO	IDO	2
BTO	XAO	221
BTO	ATMO	5
BTO	ICD9CM	4
BTO	BOOTStrep	3
BTO	PATO	2
BTO	PO_PAE	153
BTO	TAO	363
BTO	BILA	28
BTO	BHO	32
BTO	SPO	23
BTO	OBI	32
BTO	HP	4
BTO	FHHO	1
BTO	CDAO	2
BTO	ACGT	58
BTO	MO	2
BTO	NCBITaxon	25
BTO	BT	5
BTO	EFO	655
BTO	EP	3
BTO	DC_CL	10
BTO	ECG	1
BTO	MAT	245
BTO	VO	7
BTO	OPL	21
BTO	MCCL	1100
BTO	ABA	36
BTO	BCGO	4
BTO	IDOMAL	33
BTO	CLO	2
BTO	NEMO	31
BTO	PEO	1
BTO	CST	60
BTO	HL7	35
BTO	ICPC	1
BTO	MEDLINEPLUS	12
BTO	OMIM	32
BTO	PDQ	5
BTO	LNC	353
BTO	MSH	828
BTO	NDFRT	23
BTO	SNOMEDCT	1420
BTO	WHO	5
BTO	HAO	76
BTO	NIF_Dysfunction	7
BTO	GAZ	14
BTO	POL	1
BTO	ICNP	61
BTO	NIF_Cell	57
BTO	UBERON	2413
BTO	TEDDY	2
BTO	ICF	30
BTO	CTCAE	2
BTO	FLU	5
BTO	MDR	22
BTO	RXNORM	5
BTO	NDDF	17
BTO	RCD	487
BTO	ICPC2P	11
BTO	AIR	2
BTO	MCBCC	8
BTO	GFO-Bio	3
BTO	bodysystem	10
BTO	PD_ST	1
BTO	pma	43
BTO	NeoMarkOntology	1
BTO	OMIT	5
BTO	CCO	12
BTO	INO	2
BTO	ICD10	120
BTO	EHDAA2	166
BTO	oboe-sbc	9
BTO	CSP	567
BTO	VANDF	12
BTO	HCPCS	1
BTO	ADW	5
BTO	BAO	15
BTO	IDOBRU	10
BTO	NIGO	4
BTO	PHARE	4
BTO	ICD10CM	14
BTO	VSAO	35
BTO	AEO	50
BTO	HPIO	9
BTO	TM-SIGNS-AND-SYMPTS	1
BTO	vHOG	254
BTO	ExO	3
BTO	PO	160
BTO	BDO	7
BTO	IxnO	1
BTO	Chem2Bio2OWL	1
BTO	EpilepOnto	1
BTO	PedTerm	15
BTO	UnitsOntology	1
BTO	SDO	59
BTO	VT	3
BTO	SHR	7
BTO	NeoMark	1
BTO	FYPO	1
BTO	ERO	6
BTO	RH-MESH	885
BTO	BioModels	851
BTO	SOY	5
BTO	SPTO	12
BTO	CanCO	713
BTO	PFO	2
CL	MA	8
CL	BTO	482
CL	DDANAT	31
CL	EV	155
CL	FBbt	155
CL	FBdv	1
CL	FAO	44
CL	MP	106
CL	TGMA	5
CL	NCIt	341
CL	ProPreO	1
CL	WBbt	60
CL	ZEA	2
CL	ZFA	783
CL	GALEN	71
CL	basic-vertebrate-gross-anatomy	2
CL	SOPHARM	2
CL	CARO	2
CL	TADS	2
CL	WBPhenotype	1
CL	SAO	45
CL	GO	6
CL	GRO	2
CL	NPO	1
CL	nif	69
CL	birnlex	8
CL	AAO	41
CL	IDO	2
CL	XAO	162
CL	BOOTStrep	2
CL	PATO	2
CL	PO_PAE	102
CL	TAO	777
CL	BILA	3
CL	SPO	8
CL	OBI	22
CL	ACGT	7
CL	NCBITaxon	1
CL	BT	6
CL	EFO	665
CL	EP	3
CL	DC_CL	44
CL	MAT	13
CL	OPL	4
CL	MCCL	2111
CL	BCGO	2
CL	IDOMAL	36
CL	NEMO	2
CL	OMIM	1
CL	LNC	15
CL	MSH	177
CL	SNOMEDCT	183
CL	HAO	2
CL	NIF_Dysfunction	1
CL	POL	1
CL	NIF_Cell	58
CL	UBERON	3
CL	FLU	1
CL	RCD	45
CL	GFO-Bio	1
CL	OMIT	2
CL	CCO	3
CL	EHDAA2	2
CL	oboe-sbc	2
CL	CSP	103
CL	SIO	1
CL	IDOBRU	7
CL	NIGO	2
CL	DDI	1
CL	VSAO	30
CL	AEO	69
CL	vHOG	21
CL	ExO	1
CL	PO	62
CL	BDO	2
CL	VT	1
CL	FYPO	2
CL	RH-MESH	17
CL	BioModels	2093
CL	CanCO	672
CHEBI	DDANAT	1
CHEBI	EV	10
CHEBI	FBbt	1
CHEBI	FBbi	20
CHEBI	LHN	1
CHEBI	MP	1
CHEBI	MAO	8
CHEBI	IMR	408
CHEBI	NCIt	3161
CHEBI	NMR	4
CHEBI	TO	5
CHEBI	ProPreO	8
CHEBI	MI	108
CHEBI	MOD	297
CHEBI	SEP	4
CHEBI	SBO	11
CHEBI	WBbt	1
CHEBI	ZFA	1
CHEBI	pro-ont	1
CHEBI	amino-acid	22
CHEBI	GALEN	1249
CHEBI	basic-vertebrate-gross-anatomy	1
CHEBI	RID	139
CHEBI	SNPO	66
CHEBI	CPR	4
CHEBI	SOPHARM	9079
CHEBI	PR	39
CHEBI	FBsp	1
CHEBI	SAO	16
CHEBI	ENVO	1
CHEBI	GO	46
CHEBI	MIRO	466
CHEBI	GRO	21
CHEBI	NPO	551
CHEBI	nif	312
CHEBI	ODGI	5
CHEBI	MHC	2
CHEBI	birnlex	13
CHEBI	IDO	6
CHEBI	ATMO	1
CHEBI	OGI	10
CHEBI	MS	8
CHEBI	BOOTStrep	21
CHEBI	PO_PAE	1
CHEBI	SO	79
CHEBI	TAO	1
CHEBI	BHO	7
CHEBI	SPO	3
CHEBI	OBI	68
CHEBI	CDAO	24
CHEBI	ACGT	30
CHEBI	MO	1
CHEBI	NCBITaxon	16
CHEBI	BT	14
CHEBI	pseudo	1
CHEBI	EFO	774
CHEBI	EP	1
CHEBI	ECG	1
CHEBI	VO	34
CHEBI	LiPrO	58
CHEBI	OPL	1
CHEBI	CPTAC	1
CHEBI	SitBAC	1
CHEBI	MCCL	139
CHEBI	geospecies	1
CHEBI	MeGO	2
CHEBI	BCGO	1
CHEBI	IDOMAL	271
CHEBI	CLO	3
CHEBI	NEMO	3
CHEBI	BFO	1
CHEBI	PEO	2
CHEBI	CST	3
CHEBI	HL7	27
CHEBI	MEDLINEPLUS	43
CHEBI	OMIM	25
CHEBI	PDQ	522
CHEBI	LNC	2348
CHEBI	MSH	7351
CHEBI	NDFRT	4071
CHEBI	SNOMEDCT	4964
CHEBI	NIF_Dysfunction	5
CHEBI	IAO	2
CHEBI	GAZ	11
CHEBI	ICNP	8
CHEBI	NIF_Cell	5
CHEBI	k2p	2
CHEBI	PKO	3
CHEBI	ICF	1
CHEBI	SWO	1
CHEBI	OGMS	1
CHEBI	FLU	11
CHEBI	TOK	1
CHEBI	MDR	108
CHEBI	RXNORM	1715
CHEBI	NDDF	1768
CHEBI	MDDB	2
CHEBI	RCD	1554
CHEBI	ICPC2P	4
CHEBI	MCBCC	15
CHEBI	GFO	1
CHEBI	GFO-Bio	5
CHEBI	CHEMINF	7
CHEBI	TMO	10
CHEBI	OAE	3
CHEBI	IMGT	4
CHEBI	pma	22
CHEBI	RNAO	21
CHEBI	CPT	85
CHEBI	OMIT	1
CHEBI	CCO	13
CHEBI	ICPS	2
CHEBI	INO	1
CHEBI	ICD10	20
CHEBI	BP	1
CHEBI	oboe-sbc	23
CHEBI	CSP	1545
CHEBI	VANDF	1517
CHEBI	HCPCS	16
CHEBI	ADW	1
CHEBI	SIO	137
CHEBI	BAO	69
CHEBI	IDOBRU	20
CHEBI	RoleO	2
CHEBI	NIGO	1
CHEBI	DDI	66
CHEBI	PHARE	19
CHEBI	ICD10CM	2
CHEBI	CogPO	2
CHEBI	OMRSE	1
CHEBI	HPIO	7
CHEBI	FDA-MedDevice	16
CHEBI	CAO	3
CHEBI	XCO	32
CHEBI	OntoOrpha	2
CHEBI	PO	1
CHEBI	OntoDT	1
CHEBI	BDO	1
CHEBI	Chem2Bio2OWL	1
CHEBI	OntoDM	2
CHEBI	PedTerm	5
CHEBI	SDO	68
CHEBI	SHR	4
CHEBI	MFOEM	1
CHEBI	dikb-evidence	4
CHEBI	NeoMark	2
CHEBI	FYPO	97
CHEBI	vivo	2
CHEBI	NonRCTOntology	1
CHEBI	ERO	5
CHEBI	RH-MESH	8635
CHEBI	BioModels	30891
CHEBI	SOY	1
CHEBI	SPTO	5
CHEBI	CanCO	810
CHEBI	PFO	2
DDANAT	BTO	4
DDANAT	CL	31
DDANAT	CHEBI	1
DDANAT	EV	1
DDANAT	FBbt	3
DDANAT	FAO	3
DDANAT	IMR	1
DDANAT	TGMA	4
DDANAT	NCIt	17
DDANAT	ProPreO	1
DDANAT	WBbt	2
DDANAT	ZFA	3
DDANAT	GALEN	4
DDANAT	basic-vertebrate-gross-anatomy	1
DDANAT	RID	4
DDANAT	SNPO	1
DDANAT	SOPHARM	1
DDANAT	CARO	8
DDANAT	TADS	4
DDANAT	SAO	1
DDANAT	ENVO	2
DDANAT	GO	2
DDANAT	BSPO	2
DDANAT	GRO	1
DDANAT	NPO	1
DDANAT	nif	6
DDANAT	birnlex	1
DDANAT	AAO	4
DDANAT	SPD	1
DDANAT	IDO	1
DDANAT	XAO	2
DDANAT	ATMO	1
DDANAT	BOOTStrep	1
DDANAT	PO_PAE	3
DDANAT	SO	1
DDANAT	TAO	3
DDANAT	BILA	4
DDANAT	SPO	1
DDANAT	OBI	1
DDANAT	ACGT	2
DDANAT	BT	2
DDANAT	EFO	1
DDANAT	EP	1
DDANAT	DC_CL	1
DDANAT	MAT	12
DDANAT	OPL	1
DDANAT	MCCL	36
DDANAT	BCGO	1
DDANAT	IDOMAL	2
DDANAT	NEMO	2
DDANAT	OMIM	1
DDANAT	LNC	2
DDANAT	MSH	4
DDANAT	SNOMEDCT	10
DDANAT	HAO	4
DDANAT	ATO	1
DDANAT	NIF_Dysfunction	1
DDANAT	NIF_Cell	3
DDANAT	UBERON	2
DDANAT	FLU	1
DDANAT	TAXRANK	1
DDANAT	RCD	3
DDANAT	GFO-Bio	2
DDANAT	OMIT	1
DDANAT	CCO	2
DDANAT	EHDAA2	2
DDANAT	oboe-sbc	4
DDANAT	CSP	4
DDANAT	SIO	3
DDANAT	IDOBRU	2
DDANAT	NIGO	1
DDANAT	DDI	2
DDANAT	VSAO	8
DDANAT	AEO	9
DDANAT	vHOG	1
DDANAT	ExO	1
DDANAT	PO	3
DDANAT	BioModels	22
DDANAT	CanCO	3
DDANAT	PFO	1
DOID	MA	1
DOID	BTO	7
DOID	IEV	6
DOID	EV	122
DOID	MP	345
DOID	MPATH	228
DOID	NCIt	5234
DOID	PW	9
DOID	MI	1
DOID	ZFA	2
DOID	GALEN	610
DOID	RID	660
DOID	SOPHARM	2796
DOID	FBsp	2
DOID	GO	2
DOID	GRO	1
DOID	nif	230
DOID	birnlex	188
DOID	IDO	7
DOID	ATMO	13
DOID	OGI	1
DOID	ICD9CM	2791
DOID	BOOTStrep	1
DOID	PATO	1
DOID	BHO	30
DOID	OBI	5
DOID	HP	748
DOID	FHHO	29
DOID	ACGT	41
DOID	NCBITaxon	23
DOID	EFO	652
DOID	EP	1
DOID	RS	26
DOID	MAT	5
DOID	VO	25
DOID	MCCL	6372
DOID	BCGO	6
DOID	IDOMAL	12
DOID	CLO	2
DOID	NEMO	6
DOID	CST	526
DOID	HL7	24
DOID	ICPC	62
DOID	MEDLINEPLUS	505
DOID	OMIM	1458
DOID	PDQ	341
DOID	LNC	168
DOID	MSH	3034
DOID	NDFRT	1811
DOID	SNOMEDCT	9357
DOID	WHO	469
DOID	NIF_Dysfunction	227
DOID	SSO	33
DOID	GAZ	3
DOID	POL	1
DOID	ICNP	33
DOID	UBERON	4
DOID	PKO	1
DOID	OGMS	3
DOID	CTCAE	128
DOID	FLU	1
DOID	MDR	5326
DOID	RXNORM	1
DOID	NDDF	2
DOID	RCD	4028
DOID	ICPC2P	975
DOID	AIR	87
DOID	MCBCC	9
DOID	TMO	2
DOID	OAE	5
DOID	pma	14
DOID	OMIT	22
DOID	ICPS	1
DOID	ICD10	1160
DOID	NeuMORE	1
DOID	CSP	1219
DOID	VANDF	5
DOID	SIO	1
DOID	IDOBRU	13
DOID	NIGO	1
DOID	CO_Wheat	1
DOID	PHARE	2
DOID	REPO	2
DOID	ICD10CM	1883
DOID	PVOnto	1
DOID	HPIO	5
DOID	TM-SIGNS-AND-SYMPTS	9
DOID	ExO	1
DOID	HOM_EHS	9
DOID	OntoOrpha	1060
DOID	BDO	734
DOID	Chem2Bio2OWL	1
DOID	NBO	46
DOID	EpilepOnto	5
DOID	PedTerm	111
DOID	SDO	10
DOID	SHR	31
DOID	NeoMark	33
DOID	ERO	3
DOID	RH-MESH	5773
DOID	BioModels	6
DOID	SPTO	1
DOID	CanCO	695
IEV	DOID	6
IEV	EV	1
IEV	LHN	1
IEV	MP	5
IEV	MAO	4
IEV	MFO	1
IEV	MPATH	3
IEV	NCIt	218
IEV	PW	11
IEV	TO	1
IEV	MI	65
IEV	MOD	6
IEV	REX	12
IEV	SBO	23
IEV	GALEN	17
IEV	RID	8
IEV	SNPO	1
IEV	CPR	2
IEV	SOPHARM	7
IEV	WBPhenotype	1
IEV	GO	582
IEV	GRO	37
IEV	NPO	11
IEV	nif	191
IEV	birnlex	2
IEV	SPD	1
IEV	IDO	3
IEV	XAO	1
IEV	OGI	4
IEV	ICD9CM	2
IEV	BRO	2
IEV	MS	1
IEV	BOOTStrep	37
IEV	PATO	2
IEV	SO	1
IEV	TAO	2
IEV	YPO	10
IEV	BHO	3
IEV	SPO	4
IEV	OBI	9
IEV	HP	4
IEV	ACGT	4
IEV	MO	1
IEV	BT	2
IEV	EFO	8
IEV	EP	3
IEV	ECG	2
IEV	VO	3
IEV	APO	10
IEV	MCCL	5
IEV	SBRO	1
IEV	BCGO	2
IEV	IDOMAL	11
IEV	NEMO	1
IEV	PEO	2
IEV	CST	2
IEV	ICPC	2
IEV	MEDLINEPLUS	2
IEV	OMIM	2
IEV	PDQ	2
IEV	LNC	26
IEV	MSH	82
IEV	NDFRT	5
IEV	SNOMEDCT	48
IEV	WHO	1
IEV	NIF_Dysfunction	2
IEV	SSO	2
IEV	POL	1
IEV	ICNP	4
IEV	TEDDY	1
IEV	PKO	2
IEV	ICF	3
IEV	OGMS	3
IEV	CTCAE	1
IEV	FLU	1
IEV	TOK	1
IEV	MDR	7
IEV	RCD	15
IEV	ICPC2P	3
IEV	GFO	1
IEV	GFO-Bio	1
IEV	TMO	2
IEV	pma	3
IEV	NeoMarkOntology	1
IEV	OMIT	2
IEV	CCO	117
IEV	ICPS	2
IEV	INO	56
IEV	ICD10	1
IEV	NeuMORE	2
IEV	BP	4
IEV	CSP	90
IEV	ADW	2
IEV	SIO	4
IEV	BAO	11
IEV	IDOBRU	5
IEV	NIGO	122
IEV	DDI	3
IEV	PHARE	14
IEV	ICD10CM	1
IEV	PVOnto	2
IEV	HPIO	5
IEV	TM-SIGNS-AND-SYMPTS	1
IEV	ExO	1
IEV	OntoOrpha	4
IEV	BDO	4
IEV	IxnO	11
IEV	Chem2Bio2OWL	18
IEV	NBO	5
IEV	OntoDM	1
IEV	PedTerm	4
IEV	SDO	6
IEV	VT	6
IEV	SHR	2
IEV	dikb-evidence	2
IEV	NeoMark	2
IEV	vivo	2
IEV	ERO	2
IEV	RH-MESH	188
IEV	BioModels	193
IEV	CanCO	16
IEV	PFO	2
IEV	BO	1
ECO	NCIt	2
ECO	MI	2
ECO	OBI	1
ECO	ACGT	1
ECO	IDOMAL	1
ECO	HOM	6
ECO	HL7	1
ECO	MSH	1
ECO	SNOMEDCT	2
ECO	MDR	2
ECO	RCD	1
ECO	TMO	1
ECO	BP	1
ECO	CSP	1
ECO	BAO	1
ECO	Chem2Bio2OWL	1
ECO	dikb-evidence	1
ECO	ERO	2
ECO	RH-MESH	6
ECO	CanCO	1
EV	MA	700
EV	BTO	941
EV	CL	155
EV	CHEBI	10
EV	DDANAT	1
EV	DOID	122
EV	IEV	1
EV	FBbt	175
EV	FBdv	1
EV	EHDAA	1281
EV	EHDA	5019
EV	LHN	6
EV	MP	40
EV	MFO	155
EV	IMR	5
EV	TGMA	37
EV	MPATH	65
EV	NCIt	2604
EV	MI	5
EV	SEP	1
EV	SBO	1
EV	WBbt	95
EV	WBls	6
EV	ZEA	5
EV	ZFA	505
EV	GALEN	857
EV	basic-vertebrate-gross-anatomy	45
EV	RID	970
EV	SNPO	2
EV	SOPHARM	84
EV	PR	13
EV	CARO	2
EV	FBsp	7
EV	TADS	2
EV	SAO	31
EV	ENVO	25
EV	GO	12
EV	BSPO	8
EV	TTO	3
EV	GRO	4
EV	NPO	7
EV	nif	422
EV	ODGI	4
EV	birnlex	270
EV	AAO	433
EV	SPD	33
EV	IDO	7
EV	XAO	472
EV	ATMO	3
EV	OGI	1
EV	ICD9CM	40
EV	BRO	1
EV	BOOTStrep	4
EV	PATO	12
EV	PO_PAE	24
EV	SO	1
EV	TAO	525
EV	UO	4
EV	BILA	54
EV	YPO	1
EV	BHO	96
EV	SPO	26
EV	OBI	61
EV	HP	70
EV	FHHO	10
EV	ACGT	142
EV	MO	9
EV	NCBITaxon	30
EV	BT	4
EV	EFO	1053
EV	EP	13
EV	DC_CL	21
EV	ECG	2
EV	MAT	450
EV	VO	22
EV	LiPrO	1
EV	OPL	32
EV	APO	1
EV	MCCL	1503
EV	SBRO	1
EV	ABA	63
EV	BCGO	4
EV	IDOMAL	29
EV	CLO	4
EV	NEMO	50
EV	PEO	3
EV	CST	247
EV	HL7	76
EV	ICPC	17
EV	MEDLINEPLUS	104
EV	OMIM	191
EV	PDQ	40
EV	LNC	826
EV	MSH	1219
EV	NDFRT	180
EV	SNOMEDCT	2336
EV	WHO	51
EV	HAO	97
EV	NIF_Dysfunction	37
EV	SSO	7
EV	GAZ	22
EV	POL	1
EV	ICNP	160
EV	NIF_Cell	42
EV	UBERON	1607
EV	ICF	73
EV	OGMS	2
EV	CTCAE	7
EV	FLU	12
EV	MDR	166
EV	RXNORM	7
EV	NDDF	36
EV	RCD	941
EV	ICPC2P	89
EV	AIR	12
EV	MCBCC	21
EV	GFO-Bio	1
EV	CHEMINF	3
EV	TMO	7
EV	bodysystem	23
EV	OAE	2
EV	PD_ST	2
EV	pma	130
EV	NeoMarkOntology	5
EV	CPT	1
EV	OMIT	32
EV	CCO	8
EV	ICPS	2
EV	ICD10	364
EV	EHDAA2	449
EV	NeuMORE	1
EV	oboe-sbc	8
EV	CSP	956
EV	VANDF	38
EV	HCPCS	3
EV	ADW	8
EV	SIO	8
EV	BAO	43
EV	IDOBRU	27
EV	RoleO	1
EV	DDI	6
EV	PHARE	9
EV	ICD10CM	48
EV	VSAO	35
EV	CogPO	2
EV	PVOnto	1
EV	AEO	71
EV	HPIO	22
EV	TM-SIGNS-AND-SYMPTS	1
EV	vHOG	634
EV	ExO	6
EV	FDA-MedDevice	1
EV	HOM_EHS	4
EV	XCO	1
EV	OntoOrpha	75
EV	PO	26
EV	BDO	73
EV	NBO	1
EV	OntoDM	3
EV	PedTerm	40
EV	SDO	100
EV	VT	1
EV	SHR	22
EV	dikb-evidence	1
EV	NeoMark	6
EV	FYPO	1
EV	NonRCTOntology	2
EV	DiagnosticOnt	1
EV	ERO	9
EV	RH-MESH	1871
EV	BioModels	1090
EV	CanCO	1203
EV	uni-ece	1
EV	PFO	16
FBbt	MA	57
FBbt	BTO	169
FBbt	CL	155
FBbt	CHEBI	1
FBbt	DDANAT	3
FBbt	EV	175
FBbt	FBdv	5
FBbt	FAO	1
FBbt	EHDAA	179
FBbt	EHDA	784
FBbt	LHN	2
FBbt	MP	1
FBbt	MAO	1
FBbt	MFO	69
FBbt	IMR	2
FBbt	TGMA	133
FBbt	NCIt	289
FBbt	NMR	1
FBbt	ProPreO	2
FBbt	WBbt	61
FBbt	WBls	3
FBbt	ZEA	2
FBbt	ZFA	105
FBbt	GALEN	102
FBbt	basic-vertebrate-gross-anatomy	6
FBbt	RID	99
FBbt	SNPO	1
FBbt	CPR	3
FBbt	SOPHARM	3
FBbt	PR	4
FBbt	CARO	39
FBbt	TADS	45
FBbt	SAO	24
FBbt	ENVO	2
FBbt	GO	82
FBbt	BSPO	2
FBbt	GRO	3
FBbt	NPO	1
FBbt	nif	112
FBbt	ODGI	1
FBbt	MHC	1
FBbt	birnlex	25
FBbt	AAO	84
FBbt	SPD	38
FBbt	IDO	3
FBbt	XAO	89
FBbt	ATMO	1
FBbt	BOOTStrep	3
FBbt	PO_PAE	16
FBbt	TAO	107
FBbt	BILA	43
FBbt	YPO	1
FBbt	BHO	10
FBbt	SPO	4
FBbt	OBI	16
FBbt	ACGT	21
FBbt	MO	1
FBbt	NCBITaxon	11
FBbt	BT	5
FBbt	EFO	322
FBbt	EP	2
FBbt	DC_CL	7
FBbt	ECG	6
FBbt	MAT	72
FBbt	VO	5
FBbt	OPL	9
FBbt	APO	1
FBbt	MCCL	330
FBbt	ABA	2
FBbt	BCGO	4
FBbt	IDOMAL	14
FBbt	NEMO	8
FBbt	CST	25
FBbt	HL7	2
FBbt	MEDLINEPLUS	4
FBbt	OMIM	11
FBbt	PDQ	2
FBbt	LNC	79
FBbt	MSH	139
FBbt	NDFRT	2
FBbt	SNOMEDCT	215
FBbt	HAO	166
FBbt	NIF_Dysfunction	3
FBbt	GAZ	5
FBbt	ICNP	21
FBbt	NIF_Cell	16
FBbt	UBERON	423
FBbt	TEDDY	1
FBbt	ICF	4
FBbt	SWO	1
FBbt	FLU	3
FBbt	MDR	2
FBbt	RXNORM	4
FBbt	NDDF	4
FBbt	RCD	73
FBbt	MCBCC	5
FBbt	GFO-Bio	3
FBbt	TMO	1
FBbt	bodysystem	5
FBbt	PD_ST	1
FBbt	pma	9
FBbt	OMIT	3
FBbt	CCO	38
FBbt	ICD10	26
FBbt	EHDAA2	54
FBbt	oboe-sbc	18
FBbt	CSP	100
FBbt	VANDF	2
FBbt	SIO	2
FBbt	BAO	6
FBbt	IDOBRU	7
FBbt	NIGO	23
FBbt	DDI	2
FBbt	ICD10CM	2
FBbt	VSAO	45
FBbt	AEO	69
FBbt	HPIO	3
FBbt	vHOG	68
FBbt	ExO	1
FBbt	FDA-MedDevice	1
FBbt	CAO	1
FBbt	PO	17
FBbt	BDO	4
FBbt	EpilepOnto	1
FBbt	PedTerm	8
FBbt	SDO	17
FBbt	NeoMark	1
FBbt	ERO	7
FBbt	RH-MESH	156
FBbt	BioModels	265
FBbt	SOY	1
FBbt	SPTO	1
FBbt	CanCO	344
FBbt	PFO	3
FBdv	BTO	3
FBdv	CL	1
FBdv	EV	1
FBdv	FBbt	5
FBdv	MAO	1
FBdv	MFO	1
FBdv	NCIt	5
FBdv	NMR	1
FBdv	ZFA	1
FBdv	GALEN	3
FBdv	RID	2
FBdv	CPR	1
FBdv	SOPHARM	1
FBdv	SAO	1
FBdv	GO	10
FBdv	MIRO	2
FBdv	GRO	2
FBdv	NPO	2
FBdv	nif	5
FBdv	ODGI	2
FBdv	birnlex	1
FBdv	AAO	1
FBdv	IDO	2
FBdv	XAO	2
FBdv	OGI	1
FBdv	BOOTStrep	2
FBdv	PATO	1
FBdv	PO_PAE	1
FBdv	TAO	1
FBdv	BILA	3
FBdv	SPO	1
FBdv	OBI	2
FBdv	ACGT	1
FBdv	MO	1
FBdv	EFO	7
FBdv	EP	1
FBdv	ECG	1
FBdv	MAT	6
FBdv	VO	1
FBdv	OPL	5
FBdv	MCCL	2
FBdv	IDOMAL	9
FBdv	CLO	1
FBdv	NEMO	1
FBdv	BFO	1
FBdv	HL7	1
FBdv	LNC	3
FBdv	MSH	3
FBdv	SNOMEDCT	4
FBdv	NIF_Dysfunction	1
FBdv	IAO	1
FBdv	NIF_Cell	1
FBdv	UBERON	17
FBdv	OGMS	1
FBdv	FLU	1
FBdv	RCD	1
FBdv	GFO	1
FBdv	GFO-Bio	1
FBdv	CHEMINF	1
FBdv	TMO	1
FBdv	OAE	1
FBdv	RNAO	1
FBdv	INO	1
FBdv	CSP	2
FBdv	IDOBRU	2
FBdv	NIGO	2
FBdv	DDI	1
FBdv	CogPO	1
FBdv	OMRSE	1
FBdv	HPIO	1
FBdv	CAO	1
FBdv	PO	1
FBdv	BDO	1
FBdv	OntoDM	1
FBdv	PedTerm	1
FBdv	SDO	1
FBdv	MFOEM	1
FBdv	NeoMark	1
FBdv	FYPO	1
FBdv	ERO	3
FBdv	RH-MESH	6
FBdv	BioModels	6
FBdv	CanCO	8
FBdv	PFO	1
FAO	BTO	24
FAO	CL	44
FAO	DDANAT	3
FAO	FBbt	1
FAO	MP	1
FAO	IMR	1
FAO	TGMA	1
FAO	MPATH	1
FAO	NCIt	12
FAO	ProPreO	1
FAO	MI	1
FAO	WBbt	3
FAO	ZFA	1
FAO	GALEN	3
FAO	basic-vertebrate-gross-anatomy	1
FAO	RID	1
FAO	SOPHARM	1
FAO	CARO	1
FAO	TADS	1
FAO	SAO	1
FAO	GO	28
FAO	GRO	1
FAO	NPO	1
FAO	nif	6
FAO	birnlex	1
FAO	AAO	1
FAO	IDO	1
FAO	XAO	1
FAO	BOOTStrep	1
FAO	PO_PAE	3
FAO	TAO	1
FAO	BILA	1
FAO	SPO	1
FAO	OBI	1
FAO	ACGT	1
FAO	NCBITaxon	2
FAO	BT	1
FAO	EP	1
FAO	DC_CL	1
FAO	MAT	5
FAO	OPL	1
FAO	MCCL	24
FAO	BCGO	1
FAO	IDOMAL	1
FAO	NEMO	1
FAO	HL7	2
FAO	PDQ	1
FAO	MSH	7
FAO	SNOMEDCT	22
FAO	HAO	1
FAO	NIF_Dysfunction	1
FAO	GAZ	2
FAO	NIF_Cell	2
FAO	UBERON	1
FAO	TEDDY	1
FAO	SWO	1
FAO	FLU	1
FAO	MDR	1
FAO	RCD	3
FAO	GFO-Bio	1
FAO	TMO	1
FAO	OMIT	1
FAO	CCO	2
FAO	oboe-sbc	1
FAO	CSP	3
FAO	SIO	1
FAO	IDOBRU	2
FAO	NIGO	1
FAO	DDI	1
FAO	REPO	1
FAO	VSAO	1
FAO	AEO	2
FAO	vHOG	1
FAO	ExO	1
FAO	PO	2
FAO	RH-MESH	2
FAO	BioModels	29
FAO	CanCO	1
EHDAA	MA	347
EHDAA	BTO	588
EHDAA	EV	1281
EHDAA	FBbt	179
EHDAA	EHDA	138692
EHDAA	LHN	5
EHDAA	MP	3
EHDAA	MAO	1
EHDAA	MFO	223
EHDAA	IMR	1
EHDAA	TGMA	8
EHDAA	NCIt	1376
EHDAA	NMR	1
EHDAA	MI	3
EHDAA	MOD	3
EHDAA	REX	1
EHDAA	SEP	1
EHDAA	SBO	1
EHDAA	WBbt	25
EHDAA	WBls	1
EHDAA	ZEA	3
EHDAA	ZFA	702
EHDAA	GALEN	479
EHDAA	basic-vertebrate-gross-anatomy	27
EHDAA	RID	498
EHDAA	CPR	2
EHDAA	SOPHARM	39
EHDAA	PR	1
EHDAA	CARO	84
EHDAA	FBsp	1
EHDAA	TADS	84
EHDAA	SAO	1
EHDAA	ENVO	3
EHDAA	GO	6
EHDAA	MIRO	1
EHDAA	BSPO	41
EHDAA	GRO	1
EHDAA	NPO	4
EHDAA	nif	115
EHDAA	ODGI	2
EHDAA	MHC	1
EHDAA	birnlex	55
EHDAA	AAO	599
EHDAA	SPD	9
EHDAA	IDO	2
EHDAA	XAO	624
EHDAA	ATMO	1
EHDAA	OGI	1
EHDAA	ICD9CM	1
EHDAA	BRO	1
EHDAA	BOOTStrep	1
EHDAA	PATO	33
EHDAA	PO_PAE	36
EHDAA	TAO	715
EHDAA	UO	5
EHDAA	BILA	146
EHDAA	BHO	58
EHDAA	SPO	107
EHDAA	OBI	91
EHDAA	HP	4
EHDAA	CDAO	1
EHDAA	ACGT	66
EHDAA	MO	1
EHDAA	NCBITaxon	6
EHDAA	BT	5
EHDAA	EFO	441
EHDAA	EP	35
EHDAA	DC_CL	1
EHDAA	ECG	5
EHDAA	MAT	260
EHDAA	VO	2
EHDAA	OPL	14
EHDAA	MCCL	634
EHDAA	ABA	6
EHDAA	BCGO	9
EHDAA	IDOMAL	3
EHDAA	CLO	1
EHDAA	NEMO	48
EHDAA	BFO	1
EHDAA	PEO	1
EHDAA	CST	57
EHDAA	HL7	51
EHDAA	ICPC	2
EHDAA	MEDLINEPLUS	2
EHDAA	OMIM	21
EHDAA	PDQ	1
EHDAA	LNC	394
EHDAA	MSH	584
EHDAA	NDFRT	9
EHDAA	SNOMEDCT	1134
EHDAA	HAO	128
EHDAA	NIF_Dysfunction	24
EHDAA	IAO	1
EHDAA	GAZ	32
EHDAA	ICNP	76
EHDAA	NIF_Cell	24
EHDAA	UBERON	2346
EHDAA	TEDDY	1
EHDAA	ICF	10
EHDAA	SWO	2
EHDAA	OGMS	1
EHDAA	FLU	5
EHDAA	MDR	16
EHDAA	RXNORM	3
EHDAA	NDDF	5
EHDAA	RCD	402
EHDAA	AIR	2
EHDAA	MCBCC	7
EHDAA	GFO	1
EHDAA	GFO-Bio	2
EHDAA	CHEMINF	1
EHDAA	TMO	3
EHDAA	bodysystem	4
EHDAA	OAE	1
EHDAA	pma	30
EHDAA	RNAO	1
EHDAA	OMIT	4
EHDAA	CCO	3
EHDAA	INO	2
EHDAA	ICD10	60
EHDAA	EHDAA2	1053
EHDAA	NeuMORE	1
EHDAA	oboe-sbc	5
EHDAA	CSP	462
EHDAA	VANDF	9
EHDAA	ADW	3
EHDAA	SIO	5
EHDAA	BAO	92
EHDAA	IDOBRU	4
EHDAA	DDI	3
EHDAA	PHARE	4
EHDAA	ICD10CM	9
EHDAA	VSAO	97
EHDAA	CogPO	1
EHDAA	OMRSE	1
EHDAA	PVOnto	1
EHDAA	AEO	155
EHDAA	HPIO	3
EHDAA	vHOG	672
EHDAA	ExO	2
EHDAA	FDA-MedDevice	4
EHDAA	CAO	1
EHDAA	OntoOrpha	3
EHDAA	PO	36
EHDAA	BDO	30
EHDAA	OntoDM	1
EHDAA	PedTerm	8
EHDAA	SDO	44
EHDAA	SHR	2
EHDAA	MFOEM	1
EHDAA	ERO	2
EHDAA	RH-MESH	861
EHDAA	BioModels	559
EHDAA	CanCO	511
EHDAA	PFO	44
EHDAA	BO	1
EHDA	MA	1576
EHDA	BTO	2220
EHDA	EV	5019
EHDA	FBbt	784
EHDA	EHDAA	138692
EHDA	LHN	20
EHDA	MP	6
EHDA	MAO	7
EHDA	MFO	533
EHDA	IMR	3
EHDA	TGMA	25
EHDA	NCIt	5753
EHDA	NMR	4
EHDA	MI	10
EHDA	MOD	21
EHDA	REX	4
EHDA	SEP	4
EHDA	SBO	4
EHDA	WBbt	147
EHDA	WBls	21
EHDA	ZEA	31
EHDA	ZFA	2577
EHDA	GALEN	1957
EHDA	basic-vertebrate-gross-anatomy	174
EHDA	RID	2167
EHDA	CPR	8
EHDA	SOPHARM	202
EHDA	PR	3
EHDA	CARO	273
EHDA	FBsp	12
EHDA	TADS	273
EHDA	SAO	4
EHDA	ENVO	18
EHDA	GO	16
EHDA	MIRO	4
EHDA	BSPO	227
EHDA	GRO	4
EHDA	NPO	16
EHDA	nif	454
EHDA	ODGI	5
EHDA	MHC	1
EHDA	birnlex	235
EHDA	AAO	2191
EHDA	SPD	61
EHDA	IDO	16
EHDA	XAO	2185
EHDA	ATMO	11
EHDA	OGI	4
EHDA	ICD9CM	1
EHDA	BRO	1
EHDA	BOOTStrep	4
EHDA	PATO	193
EHDA	PO_PAE	109
EHDA	TAO	2637
EHDA	UO	13
EHDA	BILA	595
EHDA	BHO	305
EHDA	SPO	352
EHDA	OBI	316
EHDA	HP	18
EHDA	CDAO	5
EHDA	ACGT	344
EHDA	MO	5
EHDA	NCBITaxon	11
EHDA	BT	30
EHDA	EFO	1979
EHDA	EP	196
EHDA	DC_CL	2
EHDA	ECG	17
EHDA	MAT	1316
EHDA	VO	12
EHDA	OPL	75
EHDA	MCCL	2562
EHDA	ABA	33
EHDA	BCGO	49
EHDA	IDOMAL	26
EHDA	CLO	4
EHDA	NEMO	271
EHDA	BFO	4
EHDA	PEO	4
EHDA	CST	283
EHDA	HL7	257
EHDA	ICPC	8
EHDA	MEDLINEPLUS	12
EHDA	OMIM	113
EHDA	PDQ	6
EHDA	LNC	1742
EHDA	MSH	2241
EHDA	NDFRT	40
EHDA	SNOMEDCT	4700
EHDA	HAO	509
EHDA	NIF_Dysfunction	80
EHDA	IAO	4
EHDA	GAZ	161
EHDA	ICNP	441
EHDA	NIF_Cell	80
EHDA	UBERON	4905
EHDA	TEDDY	5
EHDA	ICF	42
EHDA	SWO	8
EHDA	OGMS	4
EHDA	FLU	20
EHDA	MDR	110
EHDA	RXNORM	12
EHDA	NDDF	18
EHDA	RCD	1772
EHDA	AIR	18
EHDA	MCBCC	44
EHDA	GFO	4
EHDA	GFO-Bio	5
EHDA	CHEMINF	4
EHDA	TMO	7
EHDA	bodysystem	39
EHDA	OAE	4
EHDA	pma	148
EHDA	RNAO	4
EHDA	OMIT	7
EHDA	CCO	8
EHDA	INO	9
EHDA	ICD10	298
EHDA	EHDAA2	3804
EHDA	NeuMORE	4
EHDA	oboe-sbc	19
EHDA	CSP	1716
EHDA	VANDF	49
EHDA	ADW	18
EHDA	SIO	12
EHDA	BAO	309
EHDA	IDOBRU	26
EHDA	DDI	19
EHDA	PHARE	19
EHDA	ICD10CM	44
EHDA	VSAO	331
EHDA	CogPO	4
EHDA	OMRSE	4
EHDA	PVOnto	4
EHDA	AEO	710
EHDA	HPIO	23
EHDA	vHOG	2581
EHDA	ExO	16
EHDA	FDA-MedDevice	4
EHDA	CAO	4
EHDA	OntoOrpha	17
EHDA	PO	109
EHDA	BDO	183
EHDA	OntoDM	4
EHDA	PedTerm	33
EHDA	SDO	241
EHDA	SHR	10
EHDA	MFOEM	4
EHDA	ERO	5
EHDA	RH-MESH	3110
EHDA	BioModels	2382
EHDA	CanCO	2332
EHDA	PFO	239
EHDA	BO	4
FBbi	CHEBI	20
FBbi	NCIt	48
FBbi	MI	8
FBbi	REX	2
FBbi	GALEN	8
FBbi	RID	1
FBbi	SOPHARM	4
FBbi	PR	6
FBbi	ENVO	1
FBbi	GO	4
FBbi	NPO	12
FBbi	nif	17
FBbi	birnlex	4
FBbi	PATO	2
FBbi	YPO	1
FBbi	SPO	1
FBbi	OBI	7
FBbi	EFO	2
FBbi	EP	2
FBbi	CPTAC	1
FBbi	APO	1
FBbi	MCCL	1
FBbi	IDOMAL	1
FBbi	CLO	1
FBbi	HL7	3
FBbi	MEDLINEPLUS	3
FBbi	OMIM	6
FBbi	PDQ	4
FBbi	LNC	17
FBbi	MSH	65
FBbi	NDFRT	29
FBbi	SNOMEDCT	55
FBbi	FLU	1
FBbi	MDR	4
FBbi	RXNORM	5
FBbi	NDDF	7
FBbi	RCD	18
FBbi	ICPC2P	1
FBbi	CHEMINF	2
FBbi	TMO	1
FBbi	pma	1
FBbi	CPT	1
FBbi	CCO	1
FBbi	CSP	29
FBbi	VANDF	5
FBbi	SIO	1
FBbi	BAO	13
FBbi	DDI	1
FBbi	PHARE	1
FBbi	CogPO	1
FBbi	FDA-MedDevice	9
FBbi	MMO	1
FBbi	XCO	1
FBbi	BDO	4
FBbi	OntoDM	1
FBbi	dikb-evidence	1
FBbi	vivo	1
FBbi	ERO	15
FBbi	RH-MESH	66
FBbi	BioModels	32
FBbi	CanCO	2
LHN	MA	2
LHN	BTO	2
LHN	CHEBI	1
LHN	IEV	1
LHN	EV	6
LHN	FBbt	2
LHN	EHDAA	5
LHN	EHDA	20
LHN	MAO	1
LHN	MFO	1
LHN	NCIt	58
LHN	NMR	2
LHN	ProPreO	1
LHN	MI	2
LHN	REX	1
LHN	SEP	3
LHN	SBO	3
LHN	WBbt	3
LHN	ZFA	3
LHN	pro-ont	1
LHN	GALEN	14
LHN	basic-vertebrate-gross-anatomy	6
LHN	RID	14
LHN	SNPO	2
LHN	CPR	8
LHN	SOPHARM	8
LHN	PR	1
LHN	FBsp	1
LHN	SAO	1
LHN	ENVO	4
LHN	MIRO	1
LHN	GRO	4
LHN	NPO	5
LHN	nif	10
LHN	ODGI	3
LHN	MHC	1
LHN	birnlex	5
LHN	AAO	3
LHN	IDO	2
LHN	XAO	3
LHN	OGI	1
LHN	BOOTStrep	4
LHN	PATO	11
LHN	SO	1
LHN	TAO	5
LHN	UO	1
LHN	BILA	1
LHN	BHO	3
LHN	OBI	4
LHN	CDAO	2
LHN	ACGT	5
LHN	MO	3
LHN	NCBITaxon	1
LHN	BT	5
LHN	EFO	6
LHN	OPB.properties	1
LHN	EP	9
LHN	ECG	2
LHN	BPMetadata	1
LHN	MAT	1
LHN	VO	2
LHN	OPL	2
LHN	SitBAC	1
LHN	MCCL	4
LHN	geospecies	2
LHN	BCGO	3
LHN	IDOMAL	4
LHN	CLO	1
LHN	NEMO	6
LHN	BFO	1
LHN	PEO	1
LHN	CST	1
LHN	HL7	15
LHN	MEDLINEPLUS	1
LHN	OMIM	3
LHN	LNC	30
LHN	MSH	9
LHN	NDFRT	4
LHN	SNOMEDCT	43
LHN	HAO	4
LHN	NIF_Dysfunction	3
LHN	IAO	1
LHN	GAZ	2
LHN	ICNP	6
LHN	NIF_Cell	3
LHN	UBERON	7
LHN	PKO	1
LHN	SWO	3
LHN	OGMS	1
LHN	FLU	2
LHN	TOK	1
LHN	RXNORM	1
LHN	NDDF	1
LHN	RCD	19
LHN	GFO	3
LHN	GFO-Bio	4
LHN	CHEMINF	1
LHN	TMO	4
LHN	OAE	1
LHN	RNAO	1
LHN	OMIT	1
LHN	CCO	3
LHN	ICPS	2
LHN	INO	2
LHN	EHDAA2	3
LHN	NeuMORE	1
LHN	oboe-sbc	7
LHN	CSP	7
LHN	VANDF	3
LHN	ADW	1
LHN	SIO	9
LHN	BAO	5
LHN	IDOBRU	2
LHN	DDI	2
LHN	PHARE	1
LHN	VSAO	2
LHN	CogPO	3
LHN	OMRSE	1
LHN	PVOnto	1
LHN	AEO	3
LHN	HPIO	3
LHN	vHOG	2
LHN	ExO	2
LHN	FDA-MedDevice	1
LHN	CAO	2
LHN	XCO	1
LHN	OntoOrpha	1
LHN	BDO	9
LHN	IxnO	1
LHN	Chem2Bio2OWL	1
LHN	PhylOnt	1
LHN	OntoDM	2
LHN	PedTerm	2
LHN	UnitsOntology	1
LHN	SDO	8
LHN	MFOEM	1
LHN	vivo	2
LHN	NonRCTOntology	1
LHN	DiagnosticOnt	2
LHN	ERO	2
LHN	RH-MESH	13
LHN	BioModels	18
LHN	CanCO	12
LHN	PFO	3
LHN	BO	2
MP	MA	87
MP	BTO	5
MP	CL	106
MP	CHEBI	1
MP	DOID	345
MP	IEV	5
MP	EV	40
MP	FBbt	1
MP	FAO	1
MP	EHDAA	3
MP	EHDA	6
MP	MFO	1
MP	IMR	2
MP	MPATH	110
MP	NCIt	683
MP	TO	3
MP	MI	1
MP	WBbt	3
MP	ZFA	2
MP	GALEN	316
MP	RID	186
MP	SNPO	1
MP	SOPHARM	9316
MP	WBPhenotype	7
MP	ENVO	1
MP	GO	183
MP	GRO	3
MP	NPO	3
MP	nif	45
MP	ODGI	2
MP	birnlex	15
MP	IDO	3
MP	XAO	1
MP	ICD9CM	183
MP	BRO	1
MP	BOOTStrep	3
MP	PATO	26
MP	SO	2
MP	TAO	1
MP	YPO	2
MP	BHO	18
MP	OBI	5
MP	HP	789
MP	FHHO	6
MP	ACGT	36
MP	NCBITaxon	12
MP	BT	1
MP	EFO	121
MP	EP	26
MP	ECG	2
MP	VO	7
MP	OPL	1
MP	APO	2
MP	MCCL	516
MP	BCGO	1
MP	IDOMAL	17
MP	NEMO	1
MP	CST	370
MP	HL7	5
MP	ICPC	29
MP	MEDLINEPLUS	153
MP	OMIM	1050
MP	PDQ	41
MP	LNC	102
MP	MSH	598
MP	NDFRT	378
MP	SNOMEDCT	1829
MP	WHO	289
MP	HAO	1
MP	NIF_Dysfunction	20
MP	SSO	36
MP	GAZ	1
MP	POL	1
MP	ICNP	39
MP	UBERON	7
MP	TEDDY	1
MP	PKO	1
MP	SWO	1
MP	OGMS	1
MP	CTCAE	134
MP	FLU	2
MP	MDR	996
MP	RCD	674
MP	ICPC2P	391
MP	AIR	23
MP	MCBCC	3
MP	TMO	1
MP	OAE	4
MP	pma	14
MP	OMIT	7
MP	CCO	2
MP	ICD10	160
MP	EHDAA2	2
MP	CSP	363
MP	ADW	1
MP	SIO	1
MP	BAO	2
MP	IDOBRU	6
MP	NIGO	46
MP	PHARE	5
MP	REPO	17
MP	ICD10CM	257
MP	AEO	3
MP	HPIO	8
MP	TM-SIGNS-AND-SYMPTS	22
MP	vHOG	2
MP	ExO	1
MP	HOM_EHS	7
MP	CMO	1
MP	OntoOrpha	217
MP	BDO	690
MP	NBO	47
MP	PedTerm	44
MP	SDO	4
MP	VT	25
MP	SHR	17
MP	FYPO	28
MP	ERO	1
MP	RH-MESH	1291
MP	BioModels	43
MP	SOY	2
MP	SPTO	4
MP	CanCO	158
MP	PFO	3
MAO	MA	1
MAO	CHEBI	8
MAO	IEV	4
MAO	FBbt	1
MAO	FBdv	1
MAO	EHDAA	1
MAO	EHDA	7
MAO	LHN	1
MAO	MFO	1
MAO	IMR	3
MAO	NCIt	66
MAO	NMR	1
MAO	ProPreO	2
MAO	MI	10
MAO	MOD	1
MAO	SEP	1
MAO	SBO	6
MAO	WBbt	1
MAO	pro-ont	2
MAO	amino-acid	2
MAO	GALEN	6
MAO	basic-vertebrate-gross-anatomy	2
MAO	RID	2
MAO	SNPO	20
MAO	CPR	1
MAO	SOPHARM	22
MAO	PR	2
MAO	SAO	3
MAO	ENVO	1
MAO	GO	14
MAO	MIRO	1
MAO	GRO	12
MAO	NPO	7
MAO	nif	33
MAO	ODGI	5
MAO	MHC	1
MAO	birnlex	10
MAO	IDO	3
MAO	ATMO	1
MAO	OGI	4
MAO	BOOTStrep	12
MAO	PATO	2
[truncated: 28,562 more rows]

## Sheet: Feb13
Source	Target	Weight
FBsp	MA	1
FBsp	BTO	3
FBsp	CHEBI	1
FBsp	DOID	2
FBsp	EV	7
FBsp	EHDAA	1
FBsp	EHDA	12
FBsp	LHN	1
FBsp	MFO	1
FBsp	IMR	1
FBsp	NCIt	208
FBsp	ProPreO	3
FBsp	WBbt	2
FBsp	ZFA	1
FBsp	GALEN	138
FBsp	basic-vertebrate-gross-anatomy	1
FBsp	RID	2
FBsp	SNPO	4
FBsp	SOPHARM	8
FBsp	PR	19
FBsp	ENVO	3
FBsp	MIRO	6
FBsp	TTO	25
FBsp	GRO	3
FBsp	nif	196
FBsp	birnlex	152
FBsp	AAO	1
FBsp	IDO	4
FBsp	XAO	1
FBsp	ICD9CM	6
FBsp	BOOTStrep	3
FBsp	SO	4
FBsp	TAO	1
FBsp	OBI	323
FBsp	CDAO	1
FBsp	ACGT	1
FBsp	NCBITaxon	1491
FBsp	BT	1
FBsp	EFO	26
FBsp	MAT	4
FBsp	VO	94
FBsp	OPL	12
FBsp	MCCL	73
FBsp	MeGO	1
FBsp	IDOMAL	14
FBsp	CLO	2
FBsp	NEMO	1
FBsp	PEO	1
FBsp	HL7	6
FBsp	MEDLINEPLUS	3
FBsp	LNC	94
FBsp	MSH	465
FBsp	NDFRT	11
FBsp	SNOMEDCT	620
FBsp	WHO	1
FBsp	GAZ	18
FBsp	ICNP	2
FBsp	UBERON	1
FBsp	SWO	7
FBsp	FLU	36
FBsp	MDR	8
FBsp	RXNORM	9
FBsp	NDDF	18
FBsp	RCD	234
FBsp	ICPC2P	5
FBsp	GFO-Bio	4
FBsp	TMO	1
FBsp	pma	3
FBsp	EDAM	5
FBsp	CPT	1
FBsp	OMIT	1
FBsp	CCO	10
FBsp	ICD10	1
FBsp	EHDAA2	1
FBsp	CSP	248
FBsp	VANDF	12
FBsp	HUGO	1
FBsp	ADW	1
FBsp	SIO	2
FBsp	BAO	27
FBsp	IDOBRU	4
FBsp	RoleO	1
FBsp	DDI	2
FBsp	PHARE	1
FBsp	ICD10CM	1
FBsp	OMRSE	19
FBsp	HPIO	6
FBsp	vHOG	1
FBsp	ExO	1
FBsp	CAO	1
FBsp	XCO	1
FBsp	OntoOrpha	2
FBsp	WSIO	1
FBsp	PedTerm	3
FBsp	SDO	1
FBsp	ERO	148
FBsp	RH-MESH	899
FBsp	BO	1
FBsp	miRNAO	50
FBsp	NTDO	2
FBsp	SWEET	10
FBsp	OntoPneumo	16
TTO	MA	1
TTO	BTO	2
TTO	EV	3
TTO	NCIt	31
TTO	pro-ont	1
TTO	GALEN	3
TTO	RID	1
TTO	SOPHARM	1
TTO	PR	6
TTO	FBsp	25
TTO	nif	34
TTO	birnlex	33
TTO	ICD9CM	1
TTO	MS	1
TTO	OBI	103
TTO	NCBITaxon	24530
TTO	EFO	4
TTO	EP	1
TTO	MAT	1
TTO	VO	17
TTO	MCCL	9
TTO	geospecies	1
TTO	IDOMAL	3
TTO	NEMO	3
TTO	HL7	4
TTO	OMIM	3
TTO	PDQ	2
TTO	LNC	36
TTO	MSH	146
TTO	NDFRT	3
TTO	SNOMEDCT	1985
TTO	HAO	1
TTO	ATO	8
TTO	GAZ	35
TTO	ICNP	1
TTO	SWO	1
TTO	FLU	6
TTO	TAXRANK	9
TTO	RXNORM	3
TTO	NDDF	1
TTO	RCD	10
TTO	GFO-Bio	1
TTO	IMGT	1
TTO	pma	4
TTO	CCO	2
TTO	EHDAA2	1
TTO	CSP	25
TTO	VANDF	1
TTO	SIO	2
TTO	BAO	1
TTO	IDOBRU	2
TTO	OMRSE	10
TTO	vHOG	1
TTO	ERO	60
TTO	RH-MESH	102
TTO	BioModels	5
TTO	OBIws	4
TTO	miRNAO	14
TTO	BRIDG	1
TTO	SWEET	6
NCBITaxon	MA	11
NCBITaxon	BTO	25
NCBITaxon	CL	1
NCBITaxon	CHEBI	17
NCBITaxon	DOID	23
NCBITaxon	EV	30
NCBITaxon	FBbt	12
NCBITaxon	FAO	2
NCBITaxon	EHDAA	6
NCBITaxon	EHDA	11
NCBITaxon	LHN	1
NCBITaxon	MP	12
NCBITaxon	MAO	1
NCBITaxon	MFO	2
NCBITaxon	IMR	5
NCBITaxon	TGMA	9
NCBITaxon	MPATH	1
NCBITaxon	NCIt	1961
NCBITaxon	NMR	1
NCBITaxon	TO	1
NCBITaxon	ProPreO	2
NCBITaxon	MI	2
NCBITaxon	MOD	1
NCBITaxon	SEP	1
NCBITaxon	WBbt	2
NCBITaxon	ZEA	2
NCBITaxon	ZFA	13
NCBITaxon	pro-ont	2
NCBITaxon	amino-acid	1
NCBITaxon	GALEN	935
NCBITaxon	basic-vertebrate-gross-anatomy	1
NCBITaxon	RID	38
NCBITaxon	SNPO	4
NCBITaxon	CPR	1
NCBITaxon	SOPHARM	40
NCBITaxon	PR	44
NCBITaxon	FBsp	1491
NCBITaxon	SAO	2
NCBITaxon	ENVO	6
NCBITaxon	GO	5
NCBITaxon	MIRO	442
NCBITaxon	TTO	24530
NCBITaxon	GRO	1
NCBITaxon	NPO	4
NCBITaxon	nif	651
NCBITaxon	MHC	2
NCBITaxon	birnlex	581
NCBITaxon	AAO	6
NCBITaxon	SPD	8
NCBITaxon	IDO	6
NCBITaxon	XAO	6
NCBITaxon	ATMO	4
NCBITaxon	ICD9CM	41
NCBITaxon	MS	2
NCBITaxon	BOOTStrep	1
NCBITaxon	PATO	1
NCBITaxon	SO	3
NCBITaxon	TAO	14
NCBITaxon	BHO	1
NCBITaxon	OBI	1114
NCBITaxon	HP	20
NCBITaxon	ACGT	6
NCBITaxon	BT	3
NCBITaxon	EFO	82
NCBITaxon	EP	1
NCBITaxon	DC_CL	1
NCBITaxon	ECG	1
NCBITaxon	MAT	11
NCBITaxon	VO	393
NCBITaxon	LiPrO	1
NCBITaxon	OPL	24
NCBITaxon	MCCL	165
NCBITaxon	geospecies	1
NCBITaxon	IDOMAL	235
NCBITaxon	CLO	9
NCBITaxon	NEMO	7
NCBITaxon	CST	23
NCBITaxon	HL7	30
NCBITaxon	ICPC	1
NCBITaxon	MEDLINEPLUS	32
NCBITaxon	OMIM	47
NCBITaxon	PDQ	29
NCBITaxon	LNC	1107
NCBITaxon	MSH	5248
NCBITaxon	NDFRT	205
NCBITaxon	SNOMEDCT	18272
NCBITaxon	WHO	18
NCBITaxon	HAO	25
NCBITaxon	ATO	28
NCBITaxon	NIF_Dysfunction	1
NCBITaxon	SSO	2
NCBITaxon	GAZ	393
NCBITaxon	ICNP	8
NCBITaxon	NIF_Cell	1
NCBITaxon	UBERON	29
NCBITaxon	ICF	2
NCBITaxon	SWO	18
NCBITaxon	CTCAE	5
NCBITaxon	FLU	69
NCBITaxon	TOK	1
NCBITaxon	TAXRANK	57
NCBITaxon	MDR	66
NCBITaxon	RXNORM	32
NCBITaxon	NDDF	150
NCBITaxon	MDDB	1
NCBITaxon	RCD	2591
NCBITaxon	ICPC2P	28
NCBITaxon	GFO-Bio	12
NCBITaxon	TMO	3
NCBITaxon	IMGT	2
NCBITaxon	pma	25
NCBITaxon	EDAM	12
NCBITaxon	CPT	10
NCBITaxon	OMIT	2
NCBITaxon	GO-EXT	5
NCBITaxon	CCO	52
NCBITaxon	ICD10	15
NCBITaxon	EHDAA2	5
NCBITaxon	CSP	1084
NCBITaxon	VANDF	169
NCBITaxon	ADW	7
NCBITaxon	SIO	7
NCBITaxon	BAO	46
NCBITaxon	IDOBRU	21
NCBITaxon	RoleO	4
NCBITaxon	DDI	2
NCBITaxon	CO_Wheat	1
NCBITaxon	PHARE	4
NCBITaxon	ICD10CM	19
NCBITaxon	CogPO	1
NCBITaxon	OMRSE	27
NCBITaxon	HPIO	15
NCBITaxon	TM-SIGNS-AND-SYMPTS	1
NCBITaxon	vHOG	7
NCBITaxon	FDA-MedDevice	2
NCBITaxon	CAO	3
NCBITaxon	XCO	4
NCBITaxon	OntoOrpha	8
NCBITaxon	OntoDT	1
NCBITaxon	BDO	14
NCBITaxon	NBO	1
NCBITaxon	PedTerm	13
NCBITaxon	SDO	2
NCBITaxon	SHR	3
NCBITaxon	NeoMark	2
NCBITaxon	FYPO	3
NCBITaxon	ERO	394
NCBITaxon	RH-MESH	7563
NCBITaxon	BioModels	67
NCBITaxon	SOY	17
NCBITaxon	SPTO	2
NCBITaxon	CanCO	1
NCBITaxon	PhenX	2
NCBITaxon	RPO	7
NCBITaxon	NIF-Subcell	1
NCBITaxon	miRNAO	17
NCBITaxon	BRIDG	1
NCBITaxon	NTDO	36
NCBITaxon	OntoKBCF	1
NCBITaxon	SWEET	33
NCBITaxon	OntoPneumo	50
OBIws	TTO	4
OBIws	CCO	1
OBIws	VariO	1
CL	MA	8
CL	BTO	483
CL	DDANAT	31
CL	EV	155
CL	FBbt	155
CL	FBdv	1
CL	FAO	44
CL	MP	107
CL	TGMA	5
CL	NCIt	341
CL	ProPreO	1
CL	WBbt	60
CL	ZEA	2
CL	ZFA	782
CL	GALEN	71
CL	basic-vertebrate-gross-anatomy	2
CL	SOPHARM	2
CL	CARO	2
CL	TADS	2
CL	WBPhenotype	1
CL	SAO	45
CL	GO	3
CL	GRO	2
CL	NPO	1
CL	nif	72
CL	birnlex	8
CL	AAO	41
CL	IDO	2
CL	XAO	162
CL	BOOTStrep	2
CL	PATO	2
CL	PO_PAE	3
CL	TAO	831
CL	BILA	3
CL	SPO	8
CL	OBI	22
CL	ACGT	7
CL	NCBITaxon	1
CL	BT	6
CL	EFO	650
CL	EP	3
CL	DC_CL	44
CL	MAT	13
CL	CBO	1
CL	VO	2
CL	OPL	4
CL	MCCL	2111
CL	BCGO	2
CL	IDOMAL	36
CL	CLO	31
CL	NEMO	2
CL	OMIM	1
CL	LNC	15
CL	MSH	177
CL	SNOMEDCT	183
CL	HAO	2
CL	NIF_Dysfunction	5
CL	POL	1
CL	NIF_Cell	62
CL	UBERON	2
CL	FLU	1
CL	RCD	45
CL	GFO-Bio	1
CL	OMIT	2
CL	GO-EXT	3
CL	CCO	4
CL	EHDAA2	75
CL	CSP	103
CL	SIO	1
CL	IDOBRU	2
CL	NIGO	2
CL	DDI	1
CL	VSAO	54
CL	AEO	75
CL	vHOG	21
CL	ExO	1
CL	PO	6
CL	BDO	2
CL	VT	1
CL	FYPO	9
CL	RH-MESH	17
CL	BioModels	2093
CL	NIF-Subcell	1
CL	NTDO	6
CL	SWEET	2
CL	OntoPneumo	1
CHEBI	DDANAT	1
CHEBI	EV	9
CHEBI	FBbt	1
CHEBI	FBbi	20
CHEBI	LHN	1
CHEBI	MP	1
CHEBI	MAO	8
CHEBI	IMR	410
CHEBI	NCIt	3325
CHEBI	NMR	4
CHEBI	TO	5
CHEBI	ProPreO	8
CHEBI	MI	111
CHEBI	MOD	300
CHEBI	SEP	4
CHEBI	SBO	11
CHEBI	WBbt	1
CHEBI	ZFA	1
CHEBI	pro-ont	1
CHEBI	amino-acid	22
CHEBI	GALEN	1258
CHEBI	basic-vertebrate-gross-anatomy	1
CHEBI	RID	140
CHEBI	SNPO	67
CHEBI	CPR	4
CHEBI	SOPHARM	9070
CHEBI	PR	46
CHEBI	FBsp	1
CHEBI	SAO	16
CHEBI	ENVO	1
CHEBI	GO	23
CHEBI	MIRO	466
CHEBI	GRO	21
CHEBI	NPO	557
CHEBI	nif	323
CHEBI	MHC	2
CHEBI	birnlex	13
CHEBI	IDO	6
CHEBI	ATMO	1
CHEBI	OGI	10
CHEBI	MS	8
CHEBI	BOOTStrep	21
CHEBI	SO	83
CHEBI	TAO	1
CHEBI	BHO	7
CHEBI	SPO	3
CHEBI	OBI	70
CHEBI	CDAO	2
CHEBI	ACGT	30
CHEBI	MO	1
CHEBI	NCBITaxon	17
CHEBI	BT	13
CHEBI	pseudo	1
CHEBI	EFO	890
CHEBI	EP	1
CHEBI	ECG	1
CHEBI	CBO	2
CHEBI	VO	34
CHEBI	LiPrO	58
CHEBI	OPL	1
CHEBI	CPTAC	1
CHEBI	SitBAC	1
CHEBI	MCCL	140
CHEBI	geospecies	1
CHEBI	MeGO	2
CHEBI	BCGO	1
CHEBI	IDOMAL	267
CHEBI	CLO	2
CHEBI	NEMO	3
CHEBI	BFO	1
CHEBI	PEO	2
CHEBI	CST	3
CHEBI	HL7	28
CHEBI	MEDLINEPLUS	41
CHEBI	OMIM	30
CHEBI	PDQ	540
CHEBI	LNC	2388
CHEBI	MSH	8933
CHEBI	NDFRT	4152
CHEBI	SNOMEDCT	5080
CHEBI	NIF_Dysfunction	5
CHEBI	IAO	2
CHEBI	GAZ	11
CHEBI	ICNP	7
CHEBI	NIF_Cell	5
CHEBI	k2p	2
CHEBI	PKO	3
CHEBI	ICF	1
CHEBI	SWO	6
CHEBI	OGMS	1
CHEBI	FLU	11
CHEBI	TOK	1
CHEBI	MDR	108
CHEBI	RXNORM	1773
CHEBI	NDDF	1839
CHEBI	MDDB	2
CHEBI	RCD	1578
CHEBI	ICPC2P	4
CHEBI	MCBCC	14
CHEBI	GFO	1
CHEBI	GFO-Bio	5
CHEBI	CHEMINF	8
CHEBI	TMO	10
CHEBI	OAE	123
CHEBI	IMGT	4
CHEBI	pma	22
CHEBI	EDAM	5
CHEBI	RNAO	23
CHEBI	CPT	89
CHEBI	OMIT	2
CHEBI	GO-EXT	23
CHEBI	CCO	202
CHEBI	ICPS	2
CHEBI	INO	1
CHEBI	ICD10	20
CHEBI	BP	1
CHEBI	CSP	1574
CHEBI	VANDF	1561
CHEBI	HCPCS	16
CHEBI	ADW	1
CHEBI	SIO	139
CHEBI	BAO	70
CHEBI	IDOBRU	16
CHEBI	RoleO	2
CHEBI	NIGO	1
CHEBI	DDI	63
CHEBI	PHARE	19
CHEBI	ICD10CM	2
CHEBI	CogPO	2
CHEBI	OMRSE	1
CHEBI	HPIO	9
CHEBI	FDA-MedDevice	16
CHEBI	CAO	3
CHEBI	CMO	17
CHEBI	XCO	72
CHEBI	OntoOrpha	1
CHEBI	OntoDT	1
CHEBI	BDO	1
CHEBI	Chem2Bio2OWL	1
CHEBI	NBO	25
CHEBI	OntoDM	2
CHEBI	PedTerm	5
CHEBI	SDO	72
CHEBI	SHR	4
CHEBI	MFOEM	1
CHEBI	dikb-evidence	4
CHEBI	NeoMark	2
CHEBI	FYPO	760
CHEBI	vivo	1
CHEBI	NonRCTOntology	1
CHEBI	ERO	5
CHEBI	RH-MESH	10117
CHEBI	BioModels	30722
CHEBI	SOY	1
CHEBI	SPTO	6
CHEBI	CanCO	8
CHEBI	PhenX	2
CHEBI	NIF-Subcell	7
CHEBI	miRNAO	6
CHEBI	BRIDG	2
CHEBI	NTDO	13
CHEBI	OntoKBCF	10
CHEBI	SWEET	51
CHEBI	VariO	15
CHEBI	GlycO	33
CHEBI	XeO	36
CHEBI	OntoPneumo	9
IEV	DOID	5
IEV	EV	1
IEV	LHN	1
IEV	MP	5
IEV	MAO	4
IEV	MFO	1
IEV	MPATH	3
IEV	NCIt	218
IEV	PW	13
IEV	TO	1
IEV	MI	65
IEV	MOD	6
IEV	REX	12
IEV	SBO	23
IEV	GALEN	17
IEV	RID	8
IEV	SNPO	1
IEV	CPR	2
IEV	SOPHARM	7
IEV	WBPhenotype	1
IEV	GO	293
IEV	GRO	37
IEV	NPO	11
IEV	nif	15
IEV	birnlex	2
IEV	SPD	1
IEV	IDO	3
IEV	XAO	1
IEV	OGI	4
IEV	ICD9CM	2
IEV	BRO	2
IEV	MS	1
IEV	BOOTStrep	37
IEV	PATO	2
IEV	SO	1
IEV	TAO	3
IEV	YPO	10
IEV	BHO	3
IEV	SPO	4
IEV	OBI	10
IEV	HP	4
IEV	ACGT	4
IEV	MO	1
IEV	BT	2
IEV	EFO	10
IEV	OPB.properties	1
IEV	EP	3
IEV	ECG	2
IEV	CBO	8
IEV	VO	3
IEV	APO	10
IEV	MCCL	5
IEV	SBRO	1
IEV	BCGO	2
IEV	IDOMAL	11
IEV	NEMO	1
IEV	PEO	2
IEV	CST	2
IEV	ICPC	2
IEV	MEDLINEPLUS	2
IEV	OMIM	2
IEV	PDQ	2
IEV	LNC	26
IEV	MSH	82
IEV	NDFRT	5
IEV	SNOMEDCT	48
IEV	WHO	1
IEV	NIF_Dysfunction	4
IEV	SSO	2
IEV	POL	1
IEV	ICNP	4
IEV	NIF_Cell	2
IEV	TEDDY	1
IEV	PKO	2
IEV	ICF	3
IEV	SWO	4
IEV	OGMS	3
IEV	CTCAE	1
IEV	FLU	1
IEV	TOK	1
IEV	MDR	7
IEV	RCD	15
IEV	ICPC2P	3
IEV	GFO	1
IEV	GFO-Bio	1
IEV	TMO	2
IEV	pma	3
IEV	EDAM	4
IEV	NeoMarkOntology	1
IEV	OMIT	2
IEV	GO-EXT	292
IEV	CCO	64
IEV	ICPS	2
IEV	INO	56
IEV	ICD10	1
IEV	NeuMORE	2
IEV	BP	4
IEV	CSP	90
IEV	ADW	2
IEV	SIO	8
IEV	BAO	11
IEV	IDOBRU	5
IEV	NIGO	122
IEV	DDI	3
IEV	PHARE	14
IEV	ICD10CM	1
IEV	VSAO	1
IEV	PVOnto	2
IEV	HPIO	6
IEV	TM-SIGNS-AND-SYMPTS	1
IEV	ExO	1
IEV	OntoOrpha	4
IEV	BDO	4
IEV	IxnO	11
IEV	Chem2Bio2OWL	18
IEV	NBO	3
IEV	OntoDM	1
IEV	PedTerm	4
IEV	SDO	6
IEV	VT	7
IEV	SHR	2
IEV	MFOEM	2
IEV	dikb-evidence	2
IEV	NeoMark	2
IEV	FYPO	64
IEV	vivo	1
IEV	ERO	2
IEV	RH-MESH	188
IEV	BioModels	193
IEV	CanCO	2
IEV	BO	1
IEV	RPO	1
IEV	miRNAO	5
IEV	NTDO	2
IEV	OntoKBCF	1
IEV	SWEET	23
IEV	VariO	4
IEV	OntoPneumo	1
FAO	BTO	24
FAO	CL	44
FAO	DDANAT	3
FAO	FBbt	1
FAO	MP	1
FAO	IMR	1
FAO	TGMA	1
FAO	MPATH	1
FAO	NCIt	12
FAO	ProPreO	1
FAO	MI	1
FAO	WBbt	3
FAO	ZFA	1
FAO	GALEN	3
FAO	basic-vertebrate-gross-anatomy	1
FAO	RID	1
FAO	SOPHARM	1
FAO	CARO	1
FAO	TADS	1
FAO	SAO	1
FAO	GO	14
FAO	GRO	1
FAO	NPO	1
FAO	nif	4
FAO	birnlex	1
FAO	AAO	1
FAO	IDO	1
FAO	XAO	1
FAO	BOOTStrep	1
FAO	TAO	2
FAO	BILA	1
FAO	SPO	1
FAO	OBI	1
FAO	ACGT	1
FAO	NCBITaxon	2
FAO	BT	1
FAO	EP	1
FAO	DC_CL	1
FAO	MAT	5
FAO	CBO	1
FAO	VO	1
FAO	OPL	1
FAO	MCCL	24
FAO	BCGO	1
FAO	IDOMAL	1
FAO	NEMO	1
FAO	HL7	2
FAO	PDQ	1
FAO	MSH	7
FAO	SNOMEDCT	22
FAO	HAO	1
FAO	NIF_Dysfunction	2
FAO	GAZ	2
FAO	NIF_Cell	3
FAO	UBERON	1
FAO	TEDDY	1
FAO	SWO	1
FAO	FLU	1
FAO	MDR	1
FAO	RCD	3
FAO	GFO-Bio	1
FAO	TMO	1
FAO	OMIT	1
FAO	GO-EXT	14
FAO	CCO	2
FAO	EHDAA2	2
FAO	CSP	3
FAO	SIO	1
FAO	IDOBRU	1
FAO	NIGO	1
FAO	DDI	1
FAO	REPO	1
FAO	VSAO	1
FAO	AEO	2
FAO	vHOG	1
FAO	ExO	1
FAO	FYPO	4
FAO	RH-MESH	2
FAO	BioModels	29
FAO	RPO	1
FAO	NIF-Subcell	1
FAO	NTDO	1
FAO	SWEET	2
FAO	OntoPneumo	1
IMR	MA	1
IMR	CHEBI	410
IMR	DDANAT	1
IMR	EV	5
IMR	FBbt	2
IMR	FAO	1
IMR	EHDAA	1
IMR	EHDA	3
IMR	MP	2
IMR	MAO	3
IMR	MPATH	1
IMR	NCIt	1502
IMR	NMR	1
IMR	ProPreO	2
IMR	MI	13
IMR	MOD	14
IMR	SBO	6
IMR	WBbt	1
IMR	amino-acid	2
IMR	GALEN	105
IMR	RID	7
IMR	SNPO	10
IMR	SOPHARM	345
IMR	PR	1363
IMR	FBsp	1
IMR	SAO	40
IMR	ENVO	2
IMR	GO	54
IMR	MIRO	2
IMR	GRO	21
IMR	NPO	12
IMR	nif	670
IMR	MHC	1
IMR	birnlex	3
IMR	IDO	2
IMR	OGI	1
IMR	MS	3
IMR	BOOTStrep	21
IMR	PATO	1
IMR	SO	6
IMR	SPO	3
IMR	OBI	7
IMR	ACGT	11
IMR	NCBITaxon	5
IMR	BT	1
IMR	EFO	66
IMR	EP	12
IMR	DC_CL	20
IMR	CBO	2
IMR	VO	13
IMR	LiPrO	6
IMR	MCCL	136
IMR	IDOMAL	19
IMR	CLO	1
IMR	NEMO	4
IMR	HL7	7
IMR	MEDLINEPLUS	5
IMR	OMIM	1072
IMR	PDQ	75
IMR	LNC	348
IMR	MSH	941
IMR	NDFRT	685
IMR	SNOMEDCT	552
IMR	HAO	1
IMR	NIF_Dysfunction	3
IMR	GAZ	12
IMR	POL	1
IMR	ICNP	1
IMR	NIF_Cell	3
IMR	UBERON	1
IMR	k2p	3
IMR	TEDDY	1
IMR	PKO	1
IMR	SWO	4
IMR	FLU	3
IMR	MDR	41
IMR	RXNORM	65
IMR	NDDF	80
IMR	RCD	201
IMR	MCBCC	13
IMR	GFO-Bio	2
IMR	CHEMINF	1
IMR	TMO	3
IMR	OAE	1
IMR	IMGT	2
IMR	pma	5
IMR	EDAM	2
IMR	CPT	21
IMR	OMIT	1
IMR	GO-EXT	54
IMR	CCO	4384
IMR	ICD10	4
IMR	EHDAA2	1
IMR	BP	1
IMR	CSP	417
IMR	VANDF	57
IMR	ADW	1
IMR	SIO	9
IMR	BAO	44
IMR	IDOBRU	2
IMR	NIGO	7
IMR	DDI	11
IMR	PHARE	8
IMR	REPO	1
IMR	HPIO	3
IMR	FDA-MedDevice	1
IMR	CAO	1
IMR	XCO	17
IMR	OntoOrpha	49
IMR	BDO	28
IMR	Chem2Bio2OWL	1
IMR	PedTerm	2
IMR	SDO	2
IMR	SHR	1
IMR	dikb-evidence	3
IMR	FYPO	45
IMR	ERO	1
IMR	RH-MESH	1198
IMR	BioModels	796
IMR	SPTO	2
IMR	CanCO	2
IMR	uni-ece	1
IMR	PhenX	1
IMR	RPO	1
IMR	NIF-Subcell	3
IMR	miRNAO	2
IMR	NTDO	1
IMR	OntoKBCF	6
IMR	SWEET	8
IMR	VariO	4
IMR	GlycO	9
IMR	XeO	2
IMR	OntoPneumo	1
MOD	CHEBI	300
MOD	IEV	6
MOD	EHDAA	3
MOD	EHDA	21
MOD	MAO	1
MOD	IMR	14
MOD	NCIt	29
MOD	MI	93
MOD	REX	2
MOD	SBO	6
MOD	GALEN	10
MOD	RID	2
MOD	SNPO	1
MOD	SOPHARM	287
MOD	PR	48
MOD	GO	1
MOD	GRO	1
MOD	NPO	2
MOD	nif	52
MOD	MS	1
MOD	BOOTStrep	1
MOD	SO	9
MOD	BHO	1
MOD	SPO	1
MOD	NCBITaxon	1
MOD	EFO	7
MOD	LiPrO	1
MOD	MCCL	1
MOD	IDOMAL	1
MOD	NEMO	1
MOD	OMIM	1
MOD	PDQ	6
MOD	LNC	34
MOD	MSH	118
MOD	NDFRT	21
MOD	SNOMEDCT	37
MOD	GAZ	1
MOD	MDR	7
MOD	RXNORM	14
MOD	NDDF	8
MOD	RCD	19
MOD	CPT	1
MOD	CCO	103
MOD	INO	8
MOD	CSP	14
MOD	VANDF	8
MOD	BAO	1
MOD	PHARE	3
MOD	FDA-MedDevice	1
MOD	IxnO	2
MOD	Chem2Bio2OWL	6
MOD	SDO	1
MOD	FYPO	8
MOD	RH-MESH	140
MOD	BioModels	329
MOD	SWEET	2
MOD	XeO	1
MOD	OntoPneumo	2
RID	MA	859
RID	BTO	561
RID	CHEBI	140
RID	DDANAT	4
RID	DOID	662
RID	IEV	8
RID	EV	970
RID	FBbt	99
RID	FBdv	2
RID	FAO	1
RID	EHDAA	498
RID	EHDA	2167
RID	FBbi	1
RID	LHN	14
RID	MP	191
RID	MAO	2
RID	MFO	81
RID	IMR	7
RID	TGMA	46
RID	MPATH	226
RID	NCIt	4086
RID	NMR	11
RID	ProPreO	2
RID	MI	15
RID	MOD	2
RID	REX	5
RID	SEP	3
RID	SBO	7
RID	WBbt	37
RID	WBls	1
RID	ZEA	5
RID	ZFA	290
RID	pro-ont	2
RID	FMA	1
RID	amino-acid	4
RID	GALEN	2388
RID	basic-vertebrate-gross-anatomy	25
RID	SNPO	15
RID	CPR	16
RID	SOPHARM	547
RID	PR	11
RID	CARO	18
RID	FBsp	2
RID	TADS	17
RID	WBPhenotype	5
RID	SAO	40
RID	ENVO	28
RID	GO	17
RID	MIRO	7
RID	BSPO	22
RID	TTO	1
RID	GRO	14
RID	NPO	159
RID	nif	1703
RID	MHC	1
RID	birnlex	633
RID	AAO	237
RID	SPD	22
RID	IDO	11
RID	TRANS	1
RID	XAO	203
RID	ATMO	5
RID	OGI	11
RID	ICD9CM	219
RID	BRO	7
RID	MS	10
RID	BOOTStrep	14
RID	PATO	173
RID	SO	10
RID	TAO	332
RID	UO	5
RID	BILA	35
RID	YPO	9
RID	BHO	90
RID	SPO	17
RID	OBI	54
RID	HP	375
RID	FHHO	17
RID	ACGT	294
RID	MO	6
RID	NCBITaxon	38
RID	BT	10
RID	EFO	677
RID	OPB.properties	4
RID	EP	143
RID	DC_CL	7
RID	ECG	34
RID	BPMetadata	1
RID	DermLex	3
RID	MAT	156
RID	CBO	11
RID	VO	30
RID	LiPrO	1
RID	OPL	18
RID	APO	10
RID	SitBAC	2
RID	MCCL	17864
RID	geospecies	2
RID	SBRO	2
RID	ABA	146
RID	BCGO	13
RID	IDOMAL	16
RID	CLO	6
RID	NEMO	130
RID	BFO	6
RID	PEO	1
RID	CST	330
RID	HL7	136
RID	ICPC	35
RID	MEDLINEPLUS	260
RID	OMIM	578
RID	PDQ	110
RID	LNC	962
RID	MSH	2061
RID	NDFRT	760
RID	SNOMEDCT	9194
RID	WHO	211
RID	HAO	101
RID	Field	1
RID	ATO	1
RID	NIF_Dysfunction	208
RID	IAO	11
RID	SSO	28
RID	GAZ	60
RID	POL	1
RID	ICNP	172
RID	NIF_Cell	154
RID	UBERON	2897
RID	k2p	1
RID	TEDDY	2
RID	PKO	1
RID	KiSAO	1
RID	ICF	52
RID	SWO	9
RID	OGMS	12
RID	CTCAE	70
RID	FLU	23
RID	TOK	3
RID	MDR	1149
RID	RXNORM	59
RID	NDDF	81
RID	ICD10PCS	1
RID	RCD	3429
RID	ICPC2P	413
RID	AIR	53
RID	MCBCC	19
RID	GFO	3
RID	GFO-Bio	6
RID	CHEMINF	14
RID	TMO	19
RID	bodysystem	11
RID	OAE	8
RID	PD_ST	1
RID	IMGT	6
RID	pma	82
RID	EDAM	7
RID	RNAO	6
RID	NeoMarkOntology	3
RID	CPT	37
RID	OMIT	40
RID	GO-EXT	17
RID	CCO	48
RID	ICPS	14
RID	MTHCH	2
RID	INO	14
RID	ICD10	319
RID	EHDAA2	274
RID	NeuMORE	5
RID	BP	2
RID	CSP	1077
RID	VANDF	78
RID	HCPCS	21
RID	ADW	7
RID	SIO	45
RID	BAO	45
RID	IDOBRU	24
RID	RoleO	1
RID	NIGO	7
RID	DDI	25
RID	PHARE	24
RID	REPO	1
RID	ICD10CM	287
RID	VSAO	40
RID	CogPO	17
RID	OMRSE	6
RID	PVOnto	5
RID	AEO	49
RID	HPIO	24
RID	TM-SIGNS-AND-SYMPTS	8
RID	vHOG	293
RID	ExO	8
RID	FDA-MedDevice	6
RID	CAO	7
RID	MMO	3
RID	XCO	9
RID	OntoOrpha	348
RID	BDO	474
RID	IxnO	2
RID	Chem2Bio2OWL	5
RID	NBO	5
RID	OntoDM	12
RID	EpilepOnto	8
RID	PedTerm	71
RID	UnitsOntology	2
RID	SDO	458
RID	VT	1
RID	SHR	31
RID	MFOEM	5
RID	QIBO	2
RID	dikb-evidence	3
RID	NeoMark	11
RID	FYPO	9
RID	vivo	2
RID	NonRCTOntology	5
RID	DiagnosticOnt	2
RID	ERO	36
RID	RH-MESH	3465
RID	BioModels	20890
RID	SOY	2
RID	SPTO	5
RID	CanCO	11
RID	PFO	5
RID	PhenX	9
RID	RPO	123
RID	NIF-Subcell	16
RID	miRNAO	7
RID	BRIDG	1
RID	NTDO	10
RID	OntoKBCF	17
RID	SWEET	150
RID	VariO	4
RID	GlycO	3
RID	XeO	36
RID	OntoPneumo	143
GO	MA	1
GO	BTO	21
GO	CL	3
GO	CHEBI	23
GO	DDANAT	1
GO	DOID	1
GO	IEV	293
GO	EV	6
GO	FBbt	42
GO	FBdv	5
GO	FAO	14
GO	EHDAA	3
GO	EHDA	8
GO	FBbi	2
GO	MP	93
GO	MAO	7
GO	MFO	7
GO	IMR	54
GO	TGMA	9
GO	MPATH	10
GO	NCIt	709
GO	PW	32
GO	TO	13
GO	ProPreO	1
GO	MI	26
GO	MOD	1
GO	REX	10
GO	SBO	18
GO	WBbt	7
GO	ZFA	10
GO	pro-ont	1
GO	FMA	1
GO	GALEN	135
GO	basic-vertebrate-gross-anatomy	3
GO	RID	17
GO	SNPO	20
GO	CPR	1
GO	SOPHARM	34
GO	PR	151
GO	CARO	3
GO	TADS	2
GO	WBPhenotype	1
GO	SAO	159
GO	MIRO	1
GO	GRO	111
GO	NPO	86
GO	nif	444
GO	MHC	2
GO	birnlex	17
GO	AAO	8
GO	SPD	1
GO	IDO	32
GO	XAO	8
GO	OGI	12
GO	ICD9CM	1
GO	BRO	3
GO	MS	1
GO	BOOTStrep	111
GO	PATO	20
GO	PO_PAE	4
GO	SO	25
GO	TAO	46
GO	BILA	2
GO	YPO	42
GO	BHO	1
GO	SPO	31
GO	OBI	134
GO	HP	8
GO	ACGT	16
GO	MO	2
GO	NCBITaxon	5
GO	BT	11
GO	pseudo	2
GO	EFO	101
GO	EP	23
GO	DC_CL	1
GO	ECG	2
GO	MAT	7
GO	CBO	27
GO	VO	24
GO	OPL	1
GO	APO	46
GO	MCCL	276
GO	SBRO	6
GO	MeGO	78
GO	BCGO	3
GO	IDOMAL	119
GO	NEMO	27
GO	PEO	2
GO	CST	10
GO	HL7	7
GO	ICPC	1
GO	MEDLINEPLUS	9
GO	OMIM	45
GO	PDQ	9
GO	LNC	100
GO	MSH	639
GO	NDFRT	126
GO	SNOMEDCT	444
GO	WHO	8
GO	HAO	5
GO	Field	1
GO	NIF_Dysfunction	34
GO	GAZ	3
GO	POL	1
GO	ICNP	26
GO	NIF_Cell	35
GO	UBERON	34
GO	k2p	1
GO	TEDDY	1
GO	PKO	2
GO	ICF	6
GO	SWO	6
GO	CTCAE	2
GO	FLU	14
GO	TOK	2
GO	MDR	54
GO	RXNORM	6
GO	NDDF	7
GO	RCD	78
GO	ICPC2P	5
GO	MCBCC	4
GO	GFO-Bio	3
GO	CHEMINF	2
GO	TMO	3
GO	OAE	87
GO	IMGT	3
GO	pma	5
GO	EDAM	6
GO	RNAO	1
GO	NeoMarkOntology	7
GO	CPT	3
GO	OMIT	4
GO	GO-EXT	34635
GO	CCO	13531
GO	INO	16
GO	EHDAA2	6
GO	BP	3
GO	CSP	462
GO	VANDF	6
GO	ADW	9
GO	SIO	18
GO	BAO	48
GO	IDOBRU	36
GO	NIGO	4822
GO	DDI	6
GO	CO_Wheat	1
GO	PHARE	15
GO	REPO	3
GO	ICD10CM	2
GO	VSAO	33
GO	AEO	4
GO	HPIO	19
GO	vHOG	6
GO	ExO	2
GO	CAO	1
GO	XCO	5
GO	OntoOrpha	13
GO	PO	4
GO	BDO	29
GO	IxnO	28
GO	Chem2Bio2OWL	17
GO	NBO	128
GO	EpilepOnto	1
GO	PedTerm	6
GO	SDO	4
GO	VT	113
GO	SHR	3
GO	MFOEM	68
GO	dikb-evidence	8
GO	FYPO	1378
GO	vivo	1
GO	ERO	7
GO	RH-MESH	1115
GO	BioModels	34167
GO	SOY	11
GO	SPTO	4
GO	CanCO	2
GO	BO	1
GO	RPO	4
GO	NIF-Subcell	161
GO	miRNAO	36
GO	NTDO	11
GO	SWEET	29
GO	VariO	12
GO	GlycO	2
GO	OntoPneumo	2
YPO	IEV	10
YPO	EV	1
YPO	FBbt	1
YPO	FBbi	1
YPO	MP	2
YPO	MFO	5
YPO	MPATH	4
YPO	NCIt	62
YPO	MI	7
YPO	REX	1
YPO	SBO	2
YPO	GALEN	12
YPO	RID	9
YPO	SOPHARM	17
YPO	WBPhenotype	2
YPO	GO	42
YPO	MIRO	1
YPO	GRO	7
YPO	NPO	6
YPO	nif	23
YPO	SPD	1
YPO	IDO	2
YPO	MS	1
YPO	BOOTStrep	7
YPO	PATO	19
YPO	UO	1
YPO	BHO	2
YPO	SPO	2
YPO	ACGT	2
YPO	EFO	6
YPO	EP	21
YPO	CBO	4
YPO	VO	3
YPO	APO	304
YPO	MCCL	4
YPO	MeGO	1
YPO	IDOMAL	6
YPO	NEMO	2
YPO	HL7	13
YPO	MEDLINEPLUS	4
YPO	OMIM	1
YPO	LNC	6
YPO	MSH	27
YPO	SNOMEDCT	29
YPO	NIF_Dysfunction	19
YPO	ICNP	2
YPO	NIF_Cell	19
YPO	UBERON	1
YPO	FLU	2
YPO	MDR	5
YPO	RCD	13
YPO	pma	2
YPO	GO-EXT	42
YPO	CCO	6
YPO	INO	3
YPO	CSP	22
YPO	ADW	2
YPO	SIO	6
YPO	BAO	10
YPO	IDOBRU	2
YPO	NIGO	11
YPO	PHARE	4
YPO	HPIO	1
YPO	BDO	19
YPO	Chem2Bio2OWL	1
YPO	SDO	3
YPO	VT	3
YPO	SHR	1
YPO	FYPO	42
YPO	ERO	1
YPO	RH-MESH	39
YPO	BioModels	57
YPO	SWEET	10
YPO	VariO	7
YPO	OntoPneumo	1
DermLex	RID	3
APO	IEV	10
APO	EV	1
APO	FBbt	1
APO	FBbi	1
APO	MP	2
APO	MFO	5
APO	MPATH	4
APO	NCIt	65
APO	MI	7
APO	REX	1
APO	SBO	2
APO	GALEN	12
APO	RID	10
APO	SOPHARM	17
APO	WBPhenotype	2
APO	GO	46
APO	MIRO	1
APO	GRO	7
APO	NPO	6
APO	nif	23
APO	SPD	1
APO	IDO	2
APO	MS	1
APO	BOOTStrep	7
APO	PATO	19
APO	UO	1
APO	YPO	304
APO	BHO	2
APO	SPO	2
APO	OBI	1
APO	ACGT	3
APO	EFO	6
APO	EP	21
APO	CBO	4
APO	VO	3
APO	MCCL	4
APO	MeGO	1
APO	IDOMAL	6
APO	NEMO	2
APO	HL7	13
APO	MEDLINEPLUS	4
APO	OMIM	1
APO	LNC	6
APO	MSH	28
APO	NDFRT	1
APO	SNOMEDCT	31
APO	NIF_Dysfunction	19
APO	ICNP	2
APO	NIF_Cell	19
APO	UBERON	1
APO	FLU	2
APO	MDR	7
APO	RCD	13
APO	pma	2
APO	GO-EXT	45
APO	CCO	6
APO	INO	3
APO	CSP	23
APO	ADW	2
APO	SIO	6
APO	BAO	11
APO	IDOBRU	2
APO	NIGO	11
APO	PHARE	4
APO	HPIO	1
APO	BDO	19
APO	Chem2Bio2OWL	1
APO	SDO	3
APO	VT	3
APO	SHR	1
APO	FYPO	43
APO	ERO	1
APO	RH-MESH	41
APO	BioModels	60
APO	SWEET	10
APO	VariO	7
APO	OntoPneumo	1
MCCL	MA	1222
MCCL	BTO	1099
MCCL	CL	2111
MCCL	CHEBI	140
MCCL	DDANAT	36
MCCL	DOID	6373
MCCL	IEV	5
MCCL	EV	1503
MCCL	FBbt	330
MCCL	FBdv	2
MCCL	FAO	24
MCCL	EHDAA	634
MCCL	EHDA	2562
MCCL	FBbi	1
MCCL	LHN	4
MCCL	MP	525
MCCL	MAO	5
MCCL	MFO	109
MCCL	IMR	136
MCCL	TGMA	57
MCCL	MPATH	223
MCCL	NCIt	10451
MCCL	NMR	1
MCCL	PW	2
MCCL	ProPreO	4
MCCL	MI	13
MCCL	MOD	1
MCCL	REX	1
MCCL	SBO	9
MCCL	WBbt	119
MCCL	WBls	1
MCCL	ZEA	8
MCCL	ZFA	1281
MCCL	pro-ont	2
MCCL	FMA	1
MCCL	amino-acid	18
MCCL	GALEN	3417
MCCL	basic-vertebrate-gross-anatomy	42
MCCL	RID	17864
MCCL	SNPO	64
MCCL	CPR	5
MCCL	ClinicalTrialOntology	1
MCCL	SOPHARM	5229
MCCL	PR	163
MCCL	CARO	22
MCCL	FBsp	73
MCCL	TADS	21
MCCL	WBPhenotype	3
MCCL	SAO	208
MCCL	ENVO	10
MCCL	GO	276
MCCL	MIRO	3
MCCL	BSPO	4
MCCL	TTO	9
MCCL	GRO	36
MCCL	NPO	46
MCCL	nif	7331
MCCL	MHC	5
MCCL	birnlex	822
MCCL	AAO	387
MCCL	SPD	33
MCCL	IDO	26
MCCL	XAO	470
MCCL	ATMO	16
MCCL	OGI	22
MCCL	ICD9CM	5018
MCCL	BRO	1
MCCL	MS	3
MCCL	BOOTStrep	36
MCCL	PATO	11
MCCL	PO_PAE	2
MCCL	SO	41
MCCL	TAO	1458
MCCL	BILA	56
MCCL	YPO	4
MCCL	BHO	93
MCCL	SPO	63
MCCL	OBI	166
MCCL	HP	842
MCCL	FHHO	36
MCCL	CDAO	1
MCCL	ACGT	328
MCCL	MO	1
MCCL	NCBITaxon	165
MCCL	BT	26
MCCL	EFO	1978
MCCL	OPB.properties	1
MCCL	EP	17
MCCL	DC_CL	50
MCCL	ECG	23
MCCL	RS	1
MCCL	MAT	248
MCCL	CBO	13
MCCL	VO	120
MCCL	LiPrO	8
MCCL	OPL	33
MCCL	APO	4
MCCL	MCCL	816
MCCL	SBRO	1
MCCL	ABA	148
MCCL	BCGO	21
MCCL	IDOMAL	93
MCCL	CLO	512
MCCL	NEMO	98
MCCL	BFO	1
MCCL	PEO	2
MCCL	CST	768
MCCL	HL7	56
MCCL	ICPC	86
MCCL	MEDLINEPLUS	513
MCCL	OMIM	1414
MCCL	PDQ	444
MCCL	LNC	1120
MCCL	MSH	5285
MCCL	NDFRT	3181
MCCL	SNOMEDCT	19429
MCCL	WHO	589
MCCL	HAO	101
MCCL	NIF_Dysfunction	183
MCCL	IAO	2
MCCL	SSO	37
MCCL	GAZ	26
MCCL	POL	4
MCCL	ICNP	176
MCCL	NIF_Cell	156
MCCL	UBERON	7941
MCCL	k2p	2
MCCL	TEDDY	1
MCCL	PKO	3
MCCL	ICF	65
MCCL	SWO	10
MCCL	OGMS	4
MCCL	CTCAE	192
MCCL	FLU	64
MCCL	MDR	7595
MCCL	RXNORM	66
MCCL	NDDF	81
MCCL	RCD	8022
MCCL	ICPC2P	1086
MCCL	AIR	62
MCCL	MCBCC	443
MCCL	GFO	1
MCCL	GFO-Bio	9
MCCL	CHEMINF	5
MCCL	TMO	11
MCCL	bodysystem	25
MCCL	OAE	2
MCCL	IMGT	4
MCCL	pma	91
MCCL	EDAM	9
MCCL	RNAO	2
MCCL	NeoMarkOntology	3
MCCL	CPT	15
MCCL	OMIT	50
MCCL	GO-EXT	274
MCCL	CCO	463
MCCL	ICPS	2
MCCL	INO	1
MCCL	ICD10	1742
MCCL	EHDAA2	491
MCCL	NeuMORE	3
MCCL	BP	3
MCCL	CSP	2309
MCCL	VANDF	84
MCCL	HCPCS	4
MCCL	ADW	2
MCCL	SIO	25
MCCL	BAO	106
MCCL	IDOBRU	36
MCCL	NIGO	187
MCCL	DDI	10
MCCL	PHARE	16
MCCL	REPO	4
MCCL	ICD10CM	2275
MCCL	VSAO	152
MCCL	CogPO	3
MCCL	OMRSE	27
MCCL	PVOnto	3
MCCL	AEO	169
MCCL	HPIO	36
MCCL	TM-SIGNS-AND-SYMPTS	23
MCCL	vHOG	460
MCCL	ExO	10
MCCL	FDA-MedDevice	1
MCCL	CAO	5
MCCL	XCO	15
MCCL	OntoOrpha	768
MCCL	PO	2
MCCL	BDO	787
MCCL	Chem2Bio2OWL	4
MCCL	NBO	33
MCCL	OntoDM	2
MCCL	EpilepOnto	4
MCCL	PedTerm	145
MCCL	SDO	563
MCCL	VT	4
MCCL	SHR	42
MCCL	MFOEM	1
MCCL	dikb-evidence	3
MCCL	NeoMark	7
MCCL	FYPO	89
MCCL	ERO	53
MCCL	RH-MESH	11583
MCCL	BioModels	64143
MCCL	SOY	2
MCCL	SPTO	4
MCCL	CanCO	10
MCCL	PFO	3
MCCL	PhenX	14
MCCL	RPO	418
MCCL	NIF-Subcell	92
MCCL	miRNAO	24
MCCL	NTDO	27
MCCL	OntoKBCF	32
MCCL	SWEET	29
MCCL	VariO	9
MCCL	GlycO	18
MCCL	XeO	2
MCCL	OntoPneumo	130
MeGO	CHEBI	2
MeGO	NCIt	14
MeGO	GALEN	2
MeGO	SNPO	31
MeGO	SOPHARM	31
MeGO	PR	2
MeGO	FBsp	1
MeGO	WBPhenotype	1
MeGO	GO	78
MeGO	GRO	2
MeGO	NPO	1
MeGO	nif	34
MeGO	BOOTStrep	2
MeGO	SO	46
MeGO	YPO	1
MeGO	OBI	2
MeGO	APO	1
MeGO	PEO	2
MeGO	OMIM	1
MeGO	LNC	2
MeGO	MSH	17
MeGO	NDFRT	4
MeGO	SNOMEDCT	9
MeGO	GAZ	1
MeGO	FLU	1
MeGO	RXNORM	2
MeGO	RCD	2
MeGO	GO-EXT	78
MeGO	CCO	38
MeGO	INO	1
MeGO	CSP	10
MeGO	VANDF	1
MeGO	HUGO	1
MeGO	NIGO	11
MeGO	HPIO	1
MeGO	FYPO	7
MeGO	ERO	1
MeGO	RH-MESH	4
MeGO	BioModels	37
MCBCC	MA	9
MCBCC	BTO	8
MCBCC	CHEBI	14
MCBCC	DOID	9
MCBCC	EV	21
MCBCC	FBbt	5
MCBCC	EHDAA	7
MCBCC	EHDA	44
MCBCC	MP	3
MCBCC	MAO	2
MCBCC	MFO	3
MCBCC	IMR	13
MCBCC	TGMA	2
MCBCC	MPATH	2
MCBCC	NCIt	193
MCBCC	MI	1
MCBCC	REX	1
MCBCC	SBO	1
MCBCC	WBbt	2
MCBCC	ZFA	7
MCBCC	GALEN	23
MCBCC	basic-vertebrate-gross-anatomy	2
MCBCC	RID	19
MCBCC	SNPO	8
MCBCC	ClinicalTrialOntology	1
MCBCC	SOPHARM	19
MCBCC	PR	46
MCBCC	CARO	2
MCBCC	TADS	2
MCBCC	SAO	2
MCBCC	ENVO	1
MCBCC	GO	4
MCBCC	MIRO	1
MCBCC	BSPO	1
MCBCC	GRO	3
MCBCC	NPO	5
MCBCC	nif	31
MCBCC	MHC	1
MCBCC	birnlex	7
MCBCC	AAO	7
MCBCC	SPD	1
MCBCC	IDO	1
MCBCC	XAO	7
MCBCC	ATMO	1
MCBCC	OGI	3
MCBCC	ICD9CM	1
MCBCC	MS	2
MCBCC	BOOTStrep	3
MCBCC	SO	8
MCBCC	TAO	9
MCBCC	BILA	5
MCBCC	BHO	2
MCBCC	SPO	1
MCBCC	OBI	4
MCBCC	HP	2
MCBCC	CDAO	1
MCBCC	ACGT	15
MCBCC	MO	1
MCBCC	BT	2
MCBCC	EFO	91
MCBCC	EP	2
MCBCC	DC_CL	2
MCBCC	ECG	1
MCBCC	MAT	9
MCBCC	CBO	1
MCBCC	VO	3
MCBCC	LiPrO	2
MCBCC	OPL	1
MCBCC	MCCL	443
MCBCC	BCGO	4
MCBCC	IDOMAL	1
MCBCC	CLO	102
MCBCC	NEMO	3
MCBCC	CST	7
MCBCC	HL7	3
MCBCC	ICPC	1
MCBCC	MEDLINEPLUS	8
MCBCC	OMIM	48
MCBCC	PDQ	13
MCBCC	LNC	36
MCBCC	MSH	62
MCBCC	NDFRT	45
MCBCC	SNOMEDCT	70
MCBCC	WHO	2
MCBCC	HAO	5
MCBCC	NIF_Dysfunction	2
MCBCC	SSO	2
MCBCC	ICNP	6
MCBCC	NIF_Cell	2
MCBCC	UBERON	16
MCBCC	k2p	1
MCBCC	PKO	1
MCBCC	SWO	2
MCBCC	CTCAE	2
MCBCC	FLU	2
MCBCC	MDR	10
MCBCC	RXNORM	8
MCBCC	NDDF	8
MCBCC	RCD	32
MCBCC	ICPC2P	1
MCBCC	GFO-Bio	1
MCBCC	CHEMINF	1
MCBCC	TMO	4
MCBCC	bodysystem	3
MCBCC	IMGT	1
MCBCC	pma	5
MCBCC	EDAM	2
MCBCC	NeoMarkOntology	1
MCBCC	CPT	2
MCBCC	OMIT	1
MCBCC	GO-EXT	4
MCBCC	CCO	94
MCBCC	ICD10	3
MCBCC	EHDAA2	4
MCBCC	BP	1
MCBCC	CSP	32
MCBCC	VANDF	13
MCBCC	HCPCS	1
MCBCC	ADW	1
MCBCC	SIO	3
MCBCC	BAO	14
MCBCC	IDOBRU	1
MCBCC	DDI	1
MCBCC	PHARE	2
MCBCC	VSAO	2
MCBCC	AEO	3
MCBCC	HPIO	2
MCBCC	vHOG	7
MCBCC	CAO	1
MCBCC	XCO	2
MCBCC	OntoOrpha	1
MCBCC	BDO	14
MCBCC	Chem2Bio2OWL	1
MCBCC	PedTerm	1
MCBCC	SDO	11
MCBCC	SHR	2
MCBCC	dikb-evidence	1
MCBCC	NeoMark	2
MCBCC	FYPO	3
MCBCC	ERO	9
MCBCC	RH-MESH	126
MCBCC	BioModels	51
MCBCC	CanCO	3
MCBCC	PFO	1
MCBCC	RPO	2
MCBCC	NIF-Subcell	2
MCBCC	miRNAO	1
MCBCC	NTDO	2
MCBCC	VariO	4
MCBCC	GlycO	2
MCBCC	OntoPneumo	3
GO-EXT	MA	1
GO-EXT	BTO	18
GO-EXT	CL	3
GO-EXT	CHEBI	23
GO-EXT	DDANAT	1
GO-EXT	DOID	1
GO-EXT	IEV	292
GO-EXT	EV	6
GO-EXT	FBbt	40
GO-EXT	FBdv	5
GO-EXT	FAO	14
GO-EXT	EHDAA	3
GO-EXT	EHDA	8
GO-EXT	FBbi	2
GO-EXT	MP	94
GO-EXT	MAO	7
GO-EXT	MFO	6
GO-EXT	IMR	54
GO-EXT	TGMA	9
GO-EXT	MPATH	11
GO-EXT	NCIt	681
GO-EXT	PW	22
GO-EXT	TO	14
GO-EXT	ProPreO	1
[truncated: 32,090 more rows]

## Sheet: Aug13
Source	Target	Weight
HIMC-CPT	MESH	84
HIMC-CPT	OBI	3
HIMC-CPT	EFO	14
HIMC-CPT	SEP	1
HIMC-CPT	MEDLINEPLUS	5
HIMC-CPT	BHO	4
HIMC-CPT	LOINC	35
HIMC-CPT	PDQ	15
HIMC-CPT	NDFRT	7
HIMC-CPT	CPRO	1
HIMC-CPT	SOPHARM	143
HIMC-CPT	SNOMEDCT	2031
HIMC-CPT	IDOMAL	1
HIMC-CPT	GALEN	20
HIMC-CPT	ACGT-MO	8
HIMC-CPT	EP	1
HIMC-CPT	VO	3
HIMC-CPT	ICD9CM	151
HIMC-CPT	CLO	1
HIMC-CPT	NIFSTD	2
HIMC-CPT	RADLEX	35
HIMC-CPT	NPO	4
HIMC-CPT	NCIT	126
HIMC-CPT	ICNP	5
HIMC-CPT	FLU	2
HIMC-CPT	MEDDRA	187
HIMC-CPT	RXNORM	10
HIMC-CPT	ICD10PCS	7
HIMC-CPT	RCD	432
HIMC-CPT	ICPC2P	42
HIMC-CPT	HL7	8
HIMC-CPT	OAE	1
HIMC-CPT	CPT	444
HIMC-CPT	CCO	7
HIMC-CPT	CPTH	13
HIMC-CPT	ICD10	3
HIMC-CPT	CRISP	37
HIMC-CPT	VANDF	10
HIMC-CPT	BAO	5
HIMC-CPT	IDOBRU	1
HIMC-CPT	COGPO	2
HIMC-CPT	CMO	19
HIMC-CPT	MMO	5
HIMC-CPT	SDO	1
HIMC-CPT	NEOMARK4	6
HIMC-CPT	ERO	23
HIMC-CPT	RH-MESH	276
HIMC-CPT	ONTOKBCF	1
HIMC-CPT	IDODEN	3
HIMC-CPT	PATHLEX	4
HIMC-CPT	ICD09	380
HIMC-CPT	ZIP5	3134
HIMC-CPT	TRAK	2
ZIP5	MESH	62
ZIP5	LOINC	3
ZIP5	SNOMEDCT	60
ZIP5	NCBITAXON	6
ZIP5	CLO	5
ZIP5	NPO	1
ZIP5	NCIT	63
ZIP5	RCD	35
ZIP5	HL7	8
ZIP5	PMA	51
ZIP5	CCO	10
ZIP5	ICPS	2
ZIP5	CRISP	3
ZIP5	IDOBRU	1
ZIP5	RH-MESH	134
ZIP5	BIOMODELS	4
ZIP5	SWEET	1
ZIP5	IDODEN	1
ZIP5	ICD09	863
ZIP5	HIMC-CPT	3134
NDFRT	CBO	2
NDFRT	NMR	2
NDFRT	MESH	35590
NDFRT	ECG	3
NDFRT	PSIMOD	21
NDFRT	PR	1112
NDFRT	MA	2
NDFRT	OBI	63
NDFRT	SNPO	111
NDFRT	ATMO	1
NDFRT	BT	5
NDFRT	CHEBI	4186
NDFRT	LHN	4
NDFRT	MEGO	4
NDFRT	WB-LS	1
NDFRT	GO	126
NDFRT	FHHO	26
NDFRT	EFO	1547
NDFRT	SEP	3
NDFRT	MEDLINEPLUS	1449
NDFRT	BTO	23
NDFRT	MAT	7
NDFRT	NEMO	2
NDFRT	FB-SP	11
NDFRT	BIRNLEX	194
NDFRT	TAO	5
NDFRT	HAO	4
NDFRT	IMR	685
NDFRT	BHO	62
NDFRT	BRO	2
NDFRT	HP	833
NDFRT	FBbi	29
NDFRT	EHDAA	9
NDFRT	SBO	11
NDFRT	ZFA	7
NDFRT	PTO	1
NDFRT	LOINC	12297
NDFRT	GRO	30
NDFRT	PATO	12
NDFRT	TTO	3
NDFRT	ZEA	2
NDFRT	PDQ	3274
NDFRT	OPL	2
NDFRT	PECO	51
NDFRT	SO	74
NDFRT	COSTART	1749
NDFRT	BCGO	2
NDFRT	ICPC	246
NDFRT	SOPHARM	3064
NDFRT	SNOMEDCT	60713
NDFRT	EHDA	40
NDFRT	SYMP	221
NDFRT	XAO	5
NDFRT	IDOMAL	153
NDFRT	ATO	1
NDFRT	MFO	2
NDFRT	WHO-ART	1667
NDFRT	IEV	5
NDFRT	FB-BT	2
NDFRT	NCBITAXON	205
NDFRT	WB-PHENOTYPE	4
NDFRT	ENVO	25
NDFRT	GALEN	3980
NDFRT	LIPRO	26
NDFRT	MAO	1
NDFRT	ACGT-MO	129
NDFRT	UO	1
NDFRT	OMIM	4497
NDFRT	SPO	10
NDFRT	EP	24
NDFRT	VO	96
NDFRT	MHC	1
NDFRT	APO	1
NDFRT	SBRO	3
NDFRT	PROPREO	4
NDFRT	MS	13
NDFRT	PPIO	28
NDFRT	SAO	57
NDFRT	ICD9CM	2312
NDFRT	DOID	1821
NDFRT	NIFSTD	3833
NDFRT	MP	381
NDFRT	MO	2
NDFRT	PW	1
NDFRT	AMINO-ACID	36
NDFRT	CL	49
NDFRT	MIRO	53
NDFRT	RADLEX	760
NDFRT	NPO	289
NDFRT	MPATH	229
NDFRT	IDO	20
NDFRT	NCIT	9621
NDFRT	NIFDYS	2022
NDFRT	SSO	74
NDFRT	ICNP	120
NDFRT	NIFCELL	13
NDFRT	UBERON	20
NDFRT	ICF	1
NDFRT	SWO	11
NDFRT	OGMS	4
NDFRT	CTCAE	237
NDFRT	FLU	15
NDFRT	TAXRANK	1
NDFRT	MEDDRA	13547
NDFRT	RXNORM	30696
NDFRT	NDDF	25952
NDFRT	MDDB	8531
NDFRT	RCD	21794
NDFRT	ICPC2P	2843
NDFRT	AI-RHEUM	210
NDFRT	MCBCC	45
NDFRT	GFO-BIO	2
NDFRT	CHEMINF	1
NDFRT	HL7	460
NDFRT	TMO	4
NDFRT	OAE	9
NDFRT	IMGT-ONTOLOGY	5
NDFRT	PMA	62
NDFRT	EDAM	10
NDFRT	RNAO	1
NDFRT	CPT	209
NDFRT	OMIT	31
NDFRT	GO-EXT	126
NDFRT	CCO	244
NDFRT	ICPS	7
NDFRT	INO	2
NDFRT	ICD10	2256
NDFRT	EHDAA2	4
NDFRT	NEUMORE	1
NDFRT	BP	1
NDFRT	CRISP	9163
NDFRT	VANDF	61513
NDFRT	HUGO	6
NDFRT	HCPCS	45
NDFRT	ADW	4
NDFRT	SIO	21
NDFRT	BAO	116
NDFRT	IDOBRU	48
NDFRT	ROLEO	1
NDFRT	NIGO	38
NDFRT	DDI	19
NDFRT	PHARE	51
NDFRT	REPO	3
NDFRT	ICD10CM	3512
NDFRT	COGPO	1
NDFRT	PVONTO	1
NDFRT	HPIO	20
NDFRT	TM-SIGNS-AND-SYMPTS	45
NDFRT	VHOG	3
NDFRT	EXO	2
NDFRT	CAO	1
NDFRT	CMO	1
NDFRT	XCO	88
NDFRT	ONTOORPHA	1136
NDFRT	PO	2
NDFRT	BDO	881
NDFRT	CHEMBIO	2
NDFRT	NBO	44
NDFRT	WSIO	1
NDFRT	EPILONT	7
NDFRT	SDO	170
NDFRT	SHR	37
NDFRT	MFOEM	1
NDFRT	DIKB	6
NDFRT	NEOMARK4	5
NDFRT	FYPO	247
NDFRT	CARELEX	1
NDFRT	ERO	87
NDFRT	RH-MESH	49736
NDFRT	BIOMODELS	4857
NDFRT	SPTO	14
NDFRT	CANCO	5
NDFRT	PHENX	87
NDFRT	RPO	441
NDFRT	OBIWS	4
NDFRT	NIFSUBCELL	10
NDFRT	IMMDIS	110
NDFRT	MIRNAO	18
NDFRT	BRIDG	1
NDFRT	NTDO	6
NDFRT	ONTOKBCF	47
NDFRT	SWEET	34
NDFRT	VARIO	11
NDFRT	GLYCO	5
NDFRT	IDODEN	114
NDFRT	XEO	63
NDFRT	MEDO	1
NDFRT	ONTOPNEUMO	45
NDFRT	IFAR	535
NDFRT	TOP-MENELAS	2
NDFRT	PATHLEX	43
NDFRT	ICD09	380
NDFRT	HIMC-CPT	7
NDFRT	HINO	881
NDFRT	PORO	5
NDFRT	ATOL	5
NDFRT	TRAK	43
RXNORM	NMR	2
RXNORM	MESH	13788
RXNORM	ECG	1
RXNORM	PSIMOD	14
RXNORM	PR	47
RXNORM	MA	1
RXNORM	OBI	20
RXNORM	SNPO	41
RXNORM	ATMO	1
RXNORM	CHEBI	1786
RXNORM	LHN	1
RXNORM	MEGO	2
RXNORM	GO	6
RXNORM	EFO	443
RXNORM	SEP	2
RXNORM	MEDLINEPLUS	89
RXNORM	BTO	5
RXNORM	MAT	1
RXNORM	NEMO	1
RXNORM	FB-SP	9
RXNORM	BIRNLEX	5
RXNORM	TAO	2
RXNORM	HAO	3
RXNORM	TGMA	3
RXNORM	IMR	65
RXNORM	BHO	11
RXNORM	FBbi	5
RXNORM	EHDAA	3
RXNORM	SBO	1
RXNORM	ZFA	2
RXNORM	LOINC	4388
RXNORM	GRO	2
RXNORM	PATO	3
RXNORM	TTO	3
RXNORM	WB-BT	1
RXNORM	PDQ	2808
RXNORM	PECO	16
RXNORM	SO	22
RXNORM	NDFRT	30696
RXNORM	COSTART	2
RXNORM	SOPHARM	558
RXNORM	SNOMEDCT	31630
RXNORM	EHDA	12
RXNORM	SYMP	1
RXNORM	XAO	1
RXNORM	IDOMAL	55
RXNORM	MFO	1
RXNORM	WHO-ART	1
RXNORM	FB-BT	4
RXNORM	NCBITAXON	32
RXNORM	ENVO	10
RXNORM	GALEN	1676
RXNORM	LIPRO	8
RXNORM	MAO	1
RXNORM	ACGT-MO	24
RXNORM	UO	1
RXNORM	SPD	1
RXNORM	OMIM	29
RXNORM	SPO	2
RXNORM	EP	3
RXNORM	VO	87
RXNORM	PROPREO	2
RXNORM	MS	8
RXNORM	PPIO	4
RXNORM	SAO	6
RXNORM	CLO	1
RXNORM	DOID	1
RXNORM	NIFSTD	266
RXNORM	MO	1
RXNORM	AMINO-ACID	20
RXNORM	CL	4
RXNORM	MIRO	17
RXNORM	RADLEX	59
RXNORM	NPO	97
RXNORM	IDO	1
RXNORM	NCIT	6159
RXNORM	NIFDYS	1
RXNORM	ICNP	12
RXNORM	NIFCELL	1
RXNORM	UBERON	6
RXNORM	ICF	1
RXNORM	CTCAE	1
RXNORM	FLU	1
RXNORM	MEDDRA	84
RXNORM	NDDF	43513
RXNORM	MDDB	9667
RXNORM	RCD	18613
RXNORM	ICPC2P	21
RXNORM	AI-RHEUM	1
RXNORM	MCBCC	8
RXNORM	GFO-BIO	1
RXNORM	HL7	294
RXNORM	OAE	3
RXNORM	PMA	13
RXNORM	CPT	80
RXNORM	GO-EXT	6
RXNORM	CCO	28
RXNORM	ICPS	2
RXNORM	ICD10	15
RXNORM	EHDAA2	1
RXNORM	CRISP	2051
RXNORM	VANDF	34063
RXNORM	HCPCS	76
RXNORM	SIO	2
RXNORM	BAO	24
RXNORM	IDOBRU	5
RXNORM	NIGO	1
RXNORM	DDI	2
RXNORM	PHARE	19
RXNORM	ICD10CM	2
RXNORM	HPIO	3
RXNORM	TM-SIGNS-AND-SYMPTS	1
RXNORM	VHOG	1
RXNORM	EXO	1
RXNORM	MMO	1
RXNORM	XCO	29
RXNORM	ONTOORPHA	5
RXNORM	PO	2
RXNORM	BDO	1
RXNORM	SDO	81
RXNORM	FYPO	65
RXNORM	VIVO	1
RXNORM	NONRCTO	1
RXNORM	DIAGONT	1
RXNORM	ERO	10
RXNORM	RH-MESH	6367
RXNORM	BIOMODELS	2774
RXNORM	SPTO	6
RXNORM	PHENX	6
RXNORM	OBIWS	1
RXNORM	NIFSUBCELL	2
RXNORM	BRIDG	1
RXNORM	ONTOKBCF	5
RXNORM	SWEET	21
RXNORM	VARIO	1
RXNORM	IDODEN	20
RXNORM	XEO	24
RXNORM	ONTOPNEUMO	33
RXNORM	IFAR	13
RXNORM	TOP-MENELAS	2
RXNORM	MCCV	1
RXNORM	ICD09	1
RXNORM	HIMC-CPT	10
RXNORM	HINO	165
RXNORM	PORO	3
RXNORM	TRAK	6
NDDF	MESH	9379
NDDF	PSIMOD	8
NDDF	PR	24
NDDF	MA	6
NDDF	OBI	38
NDDF	SNPO	43
NDDF	ATMO	3
NDDF	CHEBI	1850
NDDF	LHN	1
NDDF	GO	7
NDDF	EFO	384
NDDF	MEDLINEPLUS	75
NDDF	BTO	17
NDDF	MAT	9
NDDF	FB-SP	18
NDDF	BIRNLEX	5
NDDF	TAO	4
NDDF	HAO	3
NDDF	IMR	80
NDDF	BHO	8
NDDF	BRO	1
NDDF	FBbi	7
NDDF	EHDAA	5
NDDF	SBO	2
NDDF	ZFA	3
NDDF	LOINC	4783
NDDF	GRO	2
NDDF	PATO	3
NDDF	TTO	1
NDDF	WB-BT	1
NDDF	PDQ	1473
NDDF	PECO	15
NDDF	SO	23
NDDF	NDFRT	25952
NDDF	COSTART	6
NDDF	SOPHARM	659
NDDF	SNOMEDCT	30931
NDDF	EHDA	18
NDDF	XAO	6
NDDF	IDOMAL	40
NDDF	MFO	1
NDDF	WHO-ART	1
NDDF	FB-BT	4
NDDF	NCBITAXON	150
NDDF	ENVO	21
NDDF	GALEN	1656
NDDF	LIPRO	13
NDDF	ACGT-MO	24
NDDF	UO	1
NDDF	SPD	1
NDDF	OMIM	21
NDDF	SPO	2
NDDF	EP	4
NDDF	VO	32
NDDF	PROPREO	1
NDDF	MS	6
NDDF	PPIO	7
NDDF	SAO	5
NDDF	ICD9CM	1
NDDF	DOID	2
NDDF	NIFSTD	127
NDDF	MO	2
NDDF	AMINO-ACID	20
NDDF	CL	5
NDDF	MIRO	11
NDDF	RADLEX	81
NDDF	NPO	106
NDDF	IDO	1
NDDF	NCIT	4476
NDDF	NIFDYS	5
NDDF	SSO	1
NDDF	ICNP	18
NDDF	NIFCELL	3
NDDF	UBERON	11
NDDF	ICF	1
NDDF	SWO	3
NDDF	FLU	1
NDDF	MEDDRA	98
NDDF	RXNORM	43513
NDDF	MDDB	11812
NDDF	RCD	9962
NDDF	ICPC2P	9
NDDF	AI-RHEUM	1
NDDF	MCBCC	8
NDDF	GFO-BIO	1
NDDF	CHEMINF	1
NDDF	HL7	184
NDDF	OAE	4
NDDF	PMA	15
NDDF	EDAM	4
NDDF	RNAO	1
NDDF	CPT	78
NDDF	OMIT	1
NDDF	GO-EXT	7
NDDF	CCO	7
NDDF	ICPS	1
NDDF	ICD10	3
NDDF	EHDAA2	5
NDDF	CRISP	1847
NDDF	VANDF	22511
NDDF	HCPCS	21
NDDF	SIO	4
NDDF	BAO	25
NDDF	IDOBRU	7
NDDF	ROLEO	1
NDDF	NIGO	2
NDDF	DDI	6
NDDF	PHARE	9
NDDF	ICD10CM	1
NDDF	AEO	1
NDDF	HPIO	2
NDDF	VHOG	7
NDDF	EXO	1
NDDF	XCO	32
NDDF	ONTOORPHA	5
NDDF	BDO	4
NDDF	SDO	68
NDDF	SHR	1
NDDF	NEOMARK4	1
NDDF	FYPO	75
NDDF	ERO	43
NDDF	RH-MESH	6933
NDDF	BIOMODELS	1868
NDDF	SPTO	8
NDDF	PHENX	8
NDDF	RPO	1
NDDF	OBIWS	1
NDDF	NIFSUBCELL	1
NDDF	BRIDG	1
NDDF	ONTOKBCF	5
NDDF	SWEET	16
NDDF	VARIO	1
NDDF	IDODEN	14
NDDF	XEO	33
NDDF	ONTOPNEUMO	18
NDDF	IFAR	23
NDDF	TOP-MENELAS	1
NDDF	PATHLEX	2
NDDF	ICD09	1
NDDF	HINO	204
NDDF	PORO	4
NDDF	TRAK	5
MDDB	MESH	132
MDDB	CHEBI	2
MDDB	EFO	2
MDDB	MEDLINEPLUS	1
MDDB	LOINC	35
MDDB	PDQ	11
MDDB	NDFRT	8531
MDDB	SOPHARM	2
MDDB	SNOMEDCT	9315
MDDB	IDOMAL	2
MDDB	NCBITAXON	1
MDDB	ENVO	2
MDDB	GALEN	21
MDDB	ACGT-MO	1
MDDB	NPO	1
MDDB	NCIT	51
MDDB	MEDDRA	8
MDDB	RXNORM	9667
MDDB	NDDF	11812
MDDB	RCD	3015
MDDB	ICPC2P	2
MDDB	HL7	4
MDDB	CRISP	11
MDDB	VANDF	8519
MDDB	HCPCS	5
MDDB	RH-MESH	103
MDDB	BIOMODELS	6
MDDB	PHENX	1
MDDB	IDODEN	2
MDDB	TRAK	1
VANDF	NMR	2
VANDF	MESH	7082
VANDF	ECG	2
VANDF	PSIMOD	8
VANDF	PR	41
VANDF	MA	4
VANDF	OBI	28
VANDF	SNPO	38
VANDF	ATMO	1
VANDF	BT	2
VANDF	GEOSPECIES	1
VANDF	CHEBI	1574
VANDF	LHN	3
VANDF	MEGO	1
VANDF	GO	6
VANDF	EFO	370
VANDF	MEDLINEPLUS	146
VANDF	BTO	12
VANDF	MAT	8
VANDF	NEMO	1
VANDF	FB-SP	12
VANDF	BIRNLEX	5
VANDF	TAO	7
VANDF	HAO	2
VANDF	TGMA	1
VANDF	IMR	57
VANDF	BHO	10
VANDF	BRO	1
VANDF	HP	1
VANDF	FBbi	5
VANDF	EHDAA	9
VANDF	ZFA	7
VANDF	LOINC	4092
VANDF	GRO	4
VANDF	PATO	1
VANDF	TTO	1
VANDF	ZEA	1
VANDF	PDQ	1486
VANDF	OPL	2
VANDF	PECO	17
VANDF	SO	21
VANDF	NDFRT	61513
VANDF	COSTART	15
VANDF	SOPHARM	505
VANDF	SNOMEDCT	27639
VANDF	EHDA	49
VANDF	XAO	5
VANDF	IDOMAL	36
VANDF	MFO	2
VANDF	WHO-ART	3
VANDF	FB-BT	2
VANDF	NCBITAXON	169
VANDF	ENVO	14
VANDF	GALEN	1490
VANDF	LIPRO	12
VANDF	ACGT-MO	24
VANDF	OMIM	27
VANDF	SPO	2
VANDF	EP	3
VANDF	VO	40
VANDF	MHC	1
VANDF	PROPREO	2
VANDF	MS	4
VANDF	PPIO	2
VANDF	SAO	5
VANDF	ICD9CM	1
VANDF	DOID	5
VANDF	NIFSTD	141
VANDF	MO	1
VANDF	AMINO-ACID	17
VANDF	CL	10
VANDF	MIRO	7
VANDF	RADLEX	78
VANDF	NPO	104
VANDF	NCIT	3694
VANDF	NIFDYS	5
VANDF	IAO	1
VANDF	SSO	3
VANDF	ICNP	19
VANDF	NIFCELL	2
VANDF	UBERON	16
VANDF	ICF	3
VANDF	SWO	3
VANDF	FLU	4
VANDF	MEDDRA	101
VANDF	RXNORM	34063
VANDF	NDDF	22511
VANDF	MDDB	8519
VANDF	RCD	9140
VANDF	ICPC2P	19
VANDF	AI-RHEUM	2
VANDF	MCBCC	13
VANDF	GFO-BIO	1
VANDF	CHEMINF	2
VANDF	HL7	94
VANDF	TMO	2
VANDF	OAE	7
VANDF	IMGT-ONTOLOGY	1
VANDF	PMA	16
VANDF	EDAM	3
VANDF	CPT	90
VANDF	OMIT	3
VANDF	GO-EXT	6
VANDF	CCO	19
VANDF	ICPS	2
VANDF	INO	2
VANDF	ICD10	36
VANDF	EHDAA2	5
VANDF	BP	1
VANDF	CRISP	1894
VANDF	HCPCS	60
VANDF	ADW	1
VANDF	SIO	5
VANDF	BAO	28
VANDF	IDOBRU	7
VANDF	ROLEO	1
VANDF	DDI	7
VANDF	PHARE	11
VANDF	ICD10CM	6
VANDF	COGPO	1
VANDF	HPIO	3
VANDF	VHOG	6
VANDF	CAO	1
VANDF	XCO	31
VANDF	ONTOORPHA	7
VANDF	PO	1
VANDF	BDO	2
VANDF	CHEMBIO	1
VANDF	WSIO	1
VANDF	ONTODM-CORE	1
VANDF	EPILONT	1
VANDF	SDO	68
VANDF	SHR	4
VANDF	DIKB	1
VANDF	NEOMARK4	3
VANDF	FYPO	68
VANDF	CARELEX	1
VANDF	ERO	86
VANDF	RH-MESH	4989
VANDF	BIOMODELS	2108
VANDF	SPTO	7
VANDF	CANCO	2
VANDF	PHENX	5
VANDF	RPO	1
VANDF	OBIWS	1
VANDF	NIFSUBCELL	2
VANDF	IMMDIS	2
VANDF	MIRNAO	1
VANDF	BRIDG	1
VANDF	NTDO	2
VANDF	ONTOKBCF	4
VANDF	SWEET	21
VANDF	VARIO	2
VANDF	GLYCO	1
VANDF	IDODEN	13
VANDF	XEO	33
VANDF	MEDO	1
VANDF	ONTOPNEUMO	15
VANDF	IFAR	32
VANDF	PATHLEX	2
VANDF	ICD09	2
VANDF	HIMC-CPT	10
VANDF	HINO	163
VANDF	PORO	3
VANDF	TRAK	9
MA	MESH	574
MA	ECG	4
MA	PR	4
MA	TADS	1
MA	OBI	16
MA	ATMO	1
MA	BT	4
MA	LHN	2
MA	GO	1
MA	EFO	331
MA	MEDLINEPLUS	10
MA	BTO	471
MA	MAT	156
MA	CARO	1
MA	NEMO	26
MA	FB-SP	1
MA	BIRNLEX	150
MA	TAO	266
MA	HAO	44
MA	TGMA	15
MA	IMR	1
MA	BHO	31
MA	HP	1
MA	EHDAA	355
MA	ZFA	385
MA	LOINC	384
MA	GRO	1
MA	PATO	6
MA	TTO	1
MA	WB-BT	35
MA	ZEA	2
MA	PDQ	2
MA	OPL	13
MA	NDFRT	2
MA	CPRO	1
MA	PRO-ONT	1
MA	COSTART	53
MA	BCGO	4
MA	ICPC	1
MA	SOPHARM	3
MA	SNOMEDCT	1792
MA	EHDA	1620
MA	SYMP	1
MA	XAO	204
MA	IDOMAL	2
MA	MFO	55
MA	FB-BT	59
MA	NCBITAXON	12
MA	ABA-AMB	74
MA	ENVO	19
MA	GALEN	689
MA	MAO	1
MA	ACGT-MO	62
MA	UO	1
MA	SPD	19
MA	OMIM	29
MA	SPO	9
MA	EP	8
MA	VO	6
MA	PROPREO	1
MA	PPIO	1
MA	SAO	4
MA	DOID	1
MA	NIFSTD	263
MA	MP	86
MA	CL	943
MA	RADLEX	871
MA	NPO	1
MA	FMA	881
MA	IDO	1
MA	NCIT	4412
MA	NIFDYS	12
MA	IAO	1
MA	ICNP	57
MA	NIFCELL	12
MA	UBERON	2748
MA	TEDDY	1
MA	ICF	38
MA	FLU	3
MA	MEDDRA	6
MA	RXNORM	1
MA	NDDF	6
MA	RCD	744
MA	AI-RHEUM	3
MA	MCBCC	9
MA	GFO-BIO	1
MA	CHEMINF	2
MA	HL7	22
MA	TMO	1
MA	ICD11-BODYSYSTEM	14
MA	OAE	250
MA	PMA	44
MA	NEOMARK3	1
MA	CPT	1
MA	OMIT	8
MA	GO-EXT	1
MA	CCO	9
MA	INO	1
MA	ICD10	125
MA	EHDAA2	324
MA	NEUMORE	1
MA	CRISP	364
MA	VANDF	4
MA	HCPCS	2
MA	ADW	1
MA	SIO	2
MA	BAO	15
MA	IDOBRU	5
MA	DDI	1
MA	PHARE	4
MA	ICD10CM	9
MA	VSAO	31
MA	COGPO	1
MA	PVONTO	1
MA	AEO	33
MA	HPIO	12
MA	VHOG	472
MA	EXO	3
MA	ONTOORPHA	1
MA	PO	5
MA	BDO	9
MA	ONTODM-CORE	1
MA	SDO	81
MA	SHR	4
MA	NEOMARK4	1
MA	ERO	3
MA	RH-MESH	795
MA	BIOMODELS	961
MA	CANCO	1
MA	RPO	1
MA	NIFSUBCELL	8
MA	IMMDIS	1
MA	NTDO	4
MA	ONTOKBCF	4
MA	SWEET	9
MA	IDODEN	5
MA	ONTOPNEUMO	79
MA	IFAR	82
MA	TOP-MENELAS	3
MA	PATHLEX	32
MA	ICD09	2
MA	HINO	1
MA	PORO	5
MA	TRAK	69
TADS	CBO	1
TADS	MESH	5
TADS	ECG	5
TADS	MA	1
TADS	OBI	6
TADS	BT	3
TADS	BSPO	2
TADS	GO	2
TADS	EFO	16
TADS	BTO	2
TADS	MAT	1
TADS	CARO	45
TADS	NEMO	4
TADS	BIRNLEX	2
TADS	TAO	77
TADS	HAO	45
TADS	TGMA	42
TADS	BHO	1
TADS	EHDAA	84
TADS	ZFA	30
TADS	LOINC	1
TADS	GRO	2
TADS	WB-BT	4
TADS	OPL	2
TADS	CPRO	4
TADS	BCGO	3
TADS	SNOMEDCT	13
TADS	EHDA	273
TADS	XAO	29
TADS	IDOMAL	5
TADS	FB-BT	45
TADS	FAO	1
TADS	GALEN	5
TADS	ACGT-MO	6
TADS	SPD	3
TADS	OMIM	1
TADS	SPO	3
TADS	EP	1
TADS	VO	2
TADS	PROPREO	1
TADS	DDANAT	2
TADS	SAO	3
TADS	NIFSTD	16
TADS	CL	39
TADS	RADLEX	17
TADS	NPO	1
TADS	IDO	2
TADS	NCIT	13
TADS	NIFDYS	5
TADS	ICNP	1
TADS	NIFCELL	7
TADS	UBERON	37
TADS	FLU	1
TADS	RCD	2
TADS	MCBCC	2
TADS	GFO-BIO	3
TADS	OAE	26
TADS	OMIT	1
TADS	GO-EXT	2
TADS	CCO	3
TADS	EHDAA2	44
TADS	CRISP	4
TADS	SIO	2
TADS	BAO	4
TADS	IDOBRU	4
TADS	NIGO	2
TADS	DDI	1
TADS	VSAO	45
TADS	AEO	47
TADS	HPIO	2
TADS	VHOG	17
TADS	EXO	1
TADS	BDO	3
TADS	SDO	6
TADS	NEOMARK4	1
TADS	FYPO	2
TADS	ERO	4
TADS	RH-MESH	2
TADS	BIOMODELS	26
TADS	NIFSUBCELL	2
TADS	NTDO	3
TADS	ONTOKBCF	2
TADS	SWEET	2
TADS	IDODEN	5
TADS	ONTOPNEUMO	1
TADS	PORO	12
TADS	TRAK	2
BSPO	CBO	2
BSPO	ECG	1
BSPO	TADS	2
BSPO	EFO	11
BSPO	MAT	10
BSPO	CARO	2
BSPO	NEMO	12
BSPO	BIRNLEX	1
BSPO	TAO	3
BSPO	HAO	6
BSPO	TGMA	8
BSPO	BHO	4
BSPO	EHDAA	41
BSPO	ZFA	2
BSPO	LOINC	12
BSPO	PATO	3
BSPO	CPRO	1
BSPO	COSTART	2
BSPO	BCGO	1
BSPO	SOPHARM	10
BSPO	SNOMEDCT	34
BSPO	EHDA	227
BSPO	XAO	11
BSPO	ATO	1
BSPO	FB-BT	2
BSPO	ENVO	1
BSPO	GALEN	2
BSPO	ACGT-MO	3
BSPO	SPD	1
BSPO	EP	3
BSPO	CDAO	1
BSPO	DDANAT	2
BSPO	SAO	2
BSPO	NIFSTD	18
BSPO	CL	2
BSPO	RADLEX	23
BSPO	IDO	1
BSPO	NCIT	31
BSPO	NIFDYS	3
BSPO	ICNP	10
BSPO	NIFCELL	3
BSPO	UBERON	4
BSPO	TAXRANK	1
BSPO	RCD	24
BSPO	MCBCC	1
BSPO	GFO	1
BSPO	GFO-BIO	1
BSPO	HL7	5
BSPO	OAE	1
BSPO	INO	1
BSPO	EHDAA2	2
BSPO	HCPCS	2
BSPO	BAO	1
BSPO	IDOBRU	2
BSPO	VSAO	2
BSPO	AEO	3
BSPO	HPIO	1
BSPO	BDO	5
BSPO	SDO	2
BSPO	NEOMARK4	1
BSPO	ERO	1
BSPO	BIOMODELS	30
BSPO	SWEET	7
BSPO	ONTOPNEUMO	4
BSPO	TOP-MENELAS	10
BSPO	PATHLEX	13
BSPO	PORO	2
BSPO	TRAK	12
WB-LS	MESH	3
WB-LS	EFO	6
WB-LS	BTO	3
WB-LS	MAT	2
WB-LS	BIRNLEX	2
WB-LS	TAO	2
WB-LS	HAO	2
WB-LS	EHDAA	1
WB-LS	ZFA	4
WB-LS	LOINC	1
WB-LS	ZEA	1
WB-LS	NDFRT	1
WB-LS	SNOMEDCT	3
WB-LS	EHDA	21
WB-LS	XAO	1
WB-LS	IDOMAL	3
WB-LS	FB-BT	3
WB-LS	GALEN	2
WB-LS	NIFSTD	3
WB-LS	CL	2
WB-LS	RADLEX	1
WB-LS	NCIT	3
WB-LS	ICNP	1
WB-LS	UBERON	3
WB-LS	FLU	1
WB-LS	RCD	2
WB-LS	OAE	1
WB-LS	PLATSTG	1
WB-LS	EHDAA2	2
WB-LS	CRISP	1
WB-LS	AEO	2
WB-LS	VHOG	1
WB-LS	RH-MESH	5
WB-LS	BIOMODELS	1
WB-LS	IDODEN	3
WB-LS	PORO	1
BTO	CBO	2
BTO	FB-DV	3
BTO	MESH	828
BTO	ECG	1
BTO	PR	4
BTO	MA	471
BTO	TADS	2
BTO	OBI	32
BTO	ATMO	5
BTO	BT	5
BTO	LHN	2
BTO	WB-LS	3
BTO	GO	22
BTO	FHHO	1
BTO	EFO	631
BTO	MEDLINEPLUS	12
BTO	MAT	245
BTO	CARO	2
BTO	NEMO	35
BTO	FB-SP	3
BTO	BIRNLEX	144
BTO	TAO	419
BTO	HAO	78
BTO	TGMA	36
BTO	BHO	32
BTO	HP	4
BTO	EHDAA	588
BTO	ZFA	349
BTO	PTO	1
BTO	LOINC	353
BTO	GRO	3
BTO	PATO	2
BTO	TTO	2
BTO	WB-BT	65
BTO	ZEA	42
BTO	PDQ	5
BTO	OPL	21
BTO	NDFRT	23
BTO	COSTART	60
BTO	BCGO	4
BTO	ICPC	1
BTO	SOPHARM	10
BTO	SNOMEDCT	1418
BTO	EHDA	2220
BTO	SYMP	2
BTO	XAO	236
BTO	IDOMAL	33
BTO	PEO	1
BTO	MFO	64
BTO	WHO-ART	5
BTO	FB-BT	170
BTO	NCBITAXON	25
BTO	FAO	24
BTO	ABA-AMB	36
BTO	ENVO	25
BTO	GALEN	508
BTO	ACGT-MO	58
BTO	SPD	24
BTO	OMIM	32
BTO	SPO	23
BTO	EP	3
BTO	CDAO	2
BTO	VO	7
BTO	PPIO	1
BTO	DDANAT	4
BTO	SAO	46
BTO	ICD9CM	4
BTO	CLO	788
BTO	DOID	7
BTO	NIFSTD	338
BTO	MP	5
BTO	MO	2
BTO	CL	1035
BTO	RADLEX	561
BTO	NPO	1
BTO	MPATH	3
BTO	IDO	2
BTO	NCIT	1479
BTO	NIFDYS	15
BTO	ICNP	61
BTO	NIFCELL	60
BTO	UBERON	1155
BTO	TEDDY	2
BTO	ICF	30
BTO	SWO	1
BTO	CTCAE	2
BTO	FLU	5
BTO	MEDDRA	22
BTO	RXNORM	5
BTO	NDDF	17
BTO	RCD	487
BTO	ICPC2P	11
BTO	AI-RHEUM	2
BTO	MCBCC	8
BTO	GFO-BIO	3
BTO	HL7	35
BTO	ICD11-BODYSYSTEM	10
BTO	OAE	223
BTO	PLATSTG	1
BTO	PMA	43
BTO	NEOMARK3	1
BTO	OMIT	8
BTO	GO-EXT	18
BTO	CCO	25
BTO	INO	2
BTO	ICD10	120
BTO	EHDAA2	198
BTO	CRISP	566
BTO	VANDF	12
BTO	HCPCS	1
BTO	ADW	5
BTO	BAO	15
BTO	IDOBRU	10
BTO	NIGO	4
BTO	PHARE	4
BTO	ICD10CM	14
BTO	VSAO	56
BTO	AEO	68
BTO	HPIO	11
BTO	TM-SIGNS-AND-SYMPTS	1
BTO	VHOG	255
BTO	EXO	3
BTO	MMO	1
BTO	PO	164
BTO	BDO	7
BTO	IXNO	1
BTO	CHEMBIO	1
BTO	EPILONT	1
BTO	UNITSONT	1
BTO	SDO	59
BTO	VT	3
BTO	SHR	7
BTO	NEOMARK4	1
BTO	FYPO	3
BTO	ERO	8
BTO	RH-MESH	885
BTO	BIOMODELS	850
BTO	SOY	5
BTO	SPTO	12
BTO	RPO	5
BTO	NIFSUBCELL	16
BTO	BRIDG	1
BTO	NTDO	5
BTO	ONTOKBCF	3
BTO	SWEET	36
BTO	IDODEN	39
BTO	ONTOPNEUMO	64
BTO	IFAR	68
BTO	TOP-MENELAS	5
BTO	PATHLEX	29
BTO	ICD09	10
BTO	PORO	17
BTO	TRAK	51
MAT	CBO	2
MAT	FB-DV	6
MAT	MESH	231
MAT	PR	1
MAT	MA	156
MAT	TADS	1
MAT	OBI	16
MAT	ATMO	7
MAT	BT	6
MAT	BSPO	10
MAT	LHN	1
MAT	WB-LS	2
MAT	GO	7
MAT	EFO	349
MAT	MEDLINEPLUS	2
MAT	BTO	245
MAT	CARO	1
MAT	NEMO	20
MAT	FB-SP	4
MAT	BIRNLEX	43
MAT	TAO	153
MAT	HAO	36
MAT	TGMA	21
MAT	BHO	25
MAT	EHDAA	260
MAT	ZFA	130
MAT	LOINC	185
MAT	GRO	2
MAT	PATO	9
MAT	TTO	1
MAT	WB-BT	45
MAT	ZEA	11
MAT	PDQ	1
MAT	OPL	12
MAT	PECO	1
MAT	NDFRT	7
MAT	COSTART	43
MAT	BCGO	2
MAT	ICPC	1
MAT	SOPHARM	12
MAT	SNOMEDCT	375
MAT	EHDA	1316
MAT	XAO	151
MAT	IDOMAL	7
MAT	MFO	56
MAT	FB-BT	72
MAT	NCBITAXON	11
MAT	FAO	5
MAT	ABA-AMB	8
MAT	ENVO	13
MAT	GALEN	164
MAT	ACGT-MO	39
MAT	SPD	12
MAT	OMIM	22
MAT	SPO	6
MAT	EP	6
MAT	VO	4
MAT	DDANAT	12
MAT	SAO	6
MAT	RS	26
MAT	DOID	7
MAT	NIFSTD	101
MAT	MO	1
MAT	PW	6
MAT	CL	256
MAT	RADLEX	156
MAT	NPO	1
MAT	IDO	1
MAT	NCIT	524
MAT	NIFDYS	13
MAT	IAO	1
MAT	ICNP	43
MAT	NIFCELL	7
MAT	UBERON	282
MAT	ICF	23
MAT	FLU	5
MAT	MEDDRA	6
MAT	RXNORM	1
MAT	NDDF	9
MAT	RCD	176
MAT	ICPC2P	1
MAT	AI-RHEUM	2
MAT	MCBCC	9
MAT	CHEMINF	1
MAT	HL7	25
MAT	TMO	3
MAT	ICD11-BODYSYSTEM	9
MAT	OAE	132
MAT	PMA	39
MAT	NEOMARK3	2
MAT	OMIT	10
MAT	GO-EXT	7
MAT	CCO	6
MAT	INO	1
MAT	ICD10	89
MAT	EHDAA2	115
MAT	CRISP	177
MAT	VANDF	8
MAT	HCPCS	1
MAT	ADW	6
MAT	SIO	3
MAT	BAO	15
MAT	IDOBRU	4
MAT	ROLEO	1
MAT	DDI	1
MAT	PHARE	1
MAT	ICD10CM	3
MAT	VSAO	21
MAT	COGPO	1
MAT	AEO	20
MAT	HPIO	9
MAT	VHOG	148
MAT	EXO	1
MAT	MMO	1
MAT	XCO	1
MAT	PO	56
MAT	BDO	5
MAT	ONTODM-CORE	1
MAT	UNITSONT	1
MAT	SDO	33
MAT	SHR	3
MAT	NEOMARK4	2
MAT	FYPO	1
MAT	ERO	4
MAT	RH-MESH	362
MAT	BIOMODELS	207
MAT	SOY	5
MAT	SPTO	11
MAT	RPO	1
MAT	NIFSUBCELL	2
MAT	MIRNAO	1
MAT	NTDO	6
MAT	ONTOKBCF	3
MAT	SWEET	16
MAT	IDODEN	11
MAT	ONTOPNEUMO	50
MAT	IFAR	47
MAT	TOP-MENELAS	10
MAT	PATHLEX	26
MAT	PORO	6
MAT	TRAK	17
CARO	CBO	1
CARO	MESH	5
CARO	ECG	5
CARO	MA	1
CARO	TADS	45
CARO	OBI	6
CARO	BT	3
CARO	BSPO	2
CARO	GO	3
CARO	EFO	5
CARO	BTO	2
CARO	MAT	1
CARO	NEMO	4
CARO	BIRNLEX	2
CARO	TAO	115
CARO	HAO	46
CARO	TGMA	30
CARO	EHDAA	84
CARO	ZFA	61
CARO	LOINC	1
CARO	GRO	2
CARO	WB-BT	4
CARO	OPL	2
CARO	CPRO	4
CARO	BCGO	3
CARO	SNOMEDCT	11
CARO	EHDA	273
CARO	XAO	59
CARO	IDOMAL	8
CARO	FB-BT	39
CARO	FAO	1
CARO	GALEN	5
CARO	ACGT-MO	6
CARO	SPD	3
CARO	OMIM	1
CARO	SPO	3
CARO	EP	1
CARO	VO	2
CARO	PROPREO	1
CARO	DDANAT	6
CARO	SAO	3
CARO	NIFSTD	19
CARO	CL	53
CARO	RADLEX	18
CARO	NPO	1
CARO	IDO	2
CARO	NCIT	14
CARO	NIFDYS	7
CARO	NIFCELL	9
CARO	UBERON	38
CARO	FLU	1
CARO	RCD	1
CARO	MCBCC	2
CARO	GFO-BIO	3
CARO	OAE	30
CARO	OMIT	1
CARO	GO-EXT	3
CARO	CCO	4
CARO	EHDAA2	48
CARO	CRISP	4
CARO	SIO	2
CARO	BAO	4
CARO	IDOBRU	5
CARO	NIGO	3
CARO	DDI	1
CARO	VSAO	51
CARO	AEO	50
CARO	HPIO	2
CARO	VHOG	34
CARO	EXO	1
CARO	BDO	3
CARO	SDO	6
CARO	VT	1
CARO	NEOMARK4	1
CARO	FYPO	3
CARO	ERO	4
CARO	RH-MESH	2
CARO	BIOMODELS	27
CARO	NIFSUBCELL	2
CARO	NTDO	3
CARO	ONTOKBCF	2
CARO	SWEET	2
CARO	IDODEN	5
CARO	ONTOPNEUMO	1
CARO	PORO	12
CARO	TRAK	2
TAO	CBO	4
TAO	FB-DV	1
TAO	NMR	4
TAO	MESH	420
TAO	ECG	17
TAO	PR	5
TAO	MA	266
TAO	TADS	77
TAO	OBI	55
TAO	ATMO	1
TAO	BT	18
TAO	BSPO	3
TAO	GEOSPECIES	1
TAO	CHEBI	2
TAO	LHN	6
TAO	WB-LS	2
TAO	GO	47
TAO	EFO	690
TAO	OPB	2
TAO	SEP	4
TAO	MEDLINEPLUS	4
TAO	BTO	419
TAO	MAT	153
TAO	CARO	115
TAO	NEMO	27
TAO	FB-SP	1
TAO	BIRNLEX	86
TAO	TAO	128
TAO	HAO	138
TAO	TGMA	74
TAO	BHO	20
TAO	HP	5
TAO	EHDAA	808
TAO	SBO	2
TAO	ZFA	5389
TAO	PTO	42
TAO	LOINC	217
TAO	GRO	10
TAO	PATO	13
TAO	WB-BT	65
TAO	ZEA	4
TAO	PDQ	3
TAO	OPL	19
TAO	NDFRT	5
TAO	CPRO	16
TAO	COSTART	36
TAO	BCGO	8
TAO	ICPC	1
TAO	SOPHARM	15
TAO	SNOMEDCT	713
TAO	EHDA	2949
TAO	SYMP	1
TAO	XAO	711
TAO	IDOMAL	50
TAO	PEO	2
TAO	MFO	107
TAO	WHO-ART	1
TAO	IEV	3
TAO	FB-BT	153
TAO	NCBITAXON	14
TAO	FAO	2
TAO	ABA-AMB	14
TAO	WB-PHENOTYPE	1
TAO	ENVO	9
TAO	GALEN	331
TAO	BFO	4
TAO	MAO	1
TAO	ACGT-MO	66
TAO	SPD	15
TAO	OMIM	24
TAO	SPO	17
TAO	EP	17
TAO	VO	14
TAO	SBRO	2
TAO	PROPREO	3
TAO	PPIO	2
TAO	SITBAC	1
TAO	DDANAT	9
TAO	SAO	43
TAO	ICD9CM	1
TAO	CLO	30
TAO	NIFSTD	276
TAO	MP	1
TAO	MO	2
TAO	CL	1534
TAO	MIRO	4
TAO	RADLEX	332
TAO	NPO	8
TAO	MPATH	2
TAO	IDO	10
TAO	NCIT	908
TAO	NIFDYS	37
TAO	IAO	4
TAO	ICNP	46
TAO	NIFCELL	88
TAO	UBERON	1049
TAO	TEDDY	2
TAO	ICF	11
TAO	SWO	10
TAO	OGMS	4
TAO	CTCAE	1
TAO	FLU	11
TAO	TOK	2
TAO	MEDDRA	11
TAO	RXNORM	2
TAO	NDDF	4
TAO	RCD	253
TAO	ICPC2P	3
TAO	AI-RHEUM	6
TAO	MCBCC	9
TAO	GFO	3
TAO	GFO-BIO	10
TAO	CHEMINF	5
TAO	HL7	18
TAO	TMO	4
TAO	ICD11-BODYSYSTEM	13
TAO	OAE	506
TAO	PLATSTG	1
TAO	PMA	29
TAO	EDAM	2
TAO	RNAO	4
TAO	NEOMARK3	2
TAO	OMIT	10
TAO	GO-EXT	36
TAO	CCO	29
TAO	ICPS	1
TAO	INO	4
TAO	ICD10	39
TAO	EHDAA2	427
TAO	NEUMORE	4
TAO	CRISP	315
TAO	VANDF	7
TAO	ADW	4
TAO	SIO	14
TAO	BAO	22
TAO	IDOBRU	29
TAO	ROLEO	2
TAO	NIGO	11
TAO	DDI	6
TAO	PHARE	4
TAO	ICD10CM	2
TAO	VSAO	578
TAO	COGPO	5
TAO	PVONTO	4
TAO	AEO	252
TAO	HPIO	17
TAO	VHOG	859
TAO	EXO	10
TAO	CAO	4
TAO	MMO	2
TAO	ONTOORPHA	1
TAO	PO	17
TAO	BDO	23
TAO	NBO	4
TAO	ONTODM-CORE	4
TAO	EPILONT	1
TAO	UNITSONT	2
TAO	SDO	58
TAO	VT	8
TAO	SHR	2
TAO	MFOEM	4
TAO	NEOMARK4	3
TAO	FYPO	14
TAO	VIVO	1
TAO	ERO	16
TAO	RH-MESH	497
TAO	BIOMODELS	998
TAO	SPTO	14
TAO	CANCO	5
TAO	PHENX	1
TAO	RPO	4
TAO	OBIWS	4
TAO	VSO	5
TAO	NIFSUBCELL	9
TAO	ONSTR	5
TAO	MIRNAO	5
TAO	NTDO	18
TAO	ONTOKBCF	5
TAO	SWEET	42
TAO	IDODEN	49
TAO	MEDO	2
TAO	ONTOPNEUMO	44
TAO	IFAR	56
TAO	TOP-MENELAS	4
TAO	PATHLEX	16
TAO	ICD09	1
TAO	HINO	4
TAO	PORO	53
TAO	TRAK	38
HAO	CBO	1
HAO	NMR	1
HAO	MESH	78
HAO	ECG	8
HAO	PR	2
HAO	MA	44
HAO	TADS	45
HAO	OBI	8
HAO	SNPO	1
HAO	ATMO	1
HAO	BT	7
HAO	BSPO	6
HAO	LHN	4
HAO	WB-LS	2
HAO	GO	5
HAO	EFO	76
HAO	OPB	1
HAO	SEP	1
HAO	MEDLINEPLUS	2
HAO	BTO	78
HAO	MAT	36
HAO	CARO	46
HAO	NEMO	16
HAO	BIRNLEX	11
HAO	TAO	138
HAO	TGMA	162
HAO	IMR	1
HAO	BHO	6
HAO	HP	1
HAO	EHDAA	128
HAO	SBO	2
HAO	ZFA	66
HAO	LOINC	81
HAO	GRO	3
HAO	PATO	3
HAO	TTO	1
HAO	WB-BT	23
HAO	ZEA	1
HAO	PDQ	2
HAO	OPL	3
HAO	SO	2
HAO	NDFRT	4
HAO	CPRO	7
HAO	COSTART	11
HAO	BCGO	4
HAO	SOPHARM	4
HAO	SNOMEDCT	202
HAO	EHDA	509
HAO	SYMP	1
HAO	XAO	60
HAO	IDOMAL	10
HAO	PEO	2
HAO	MFO	26
HAO	WHO-ART	1
HAO	FB-BT	169
HAO	NCBITAXON	25
HAO	FAO	1
HAO	ENVO	2
HAO	GALEN	78
HAO	BFO	1
HAO	ACGT-MO	17
HAO	SPD	36
HAO	OMIM	15
HAO	SPO	4
HAO	EP	4
HAO	CDAO	1
HAO	VO	3
HAO	SBRO	1
HAO	PROPREO	1
HAO	PPIO	1
HAO	DDANAT	2
HAO	SAO	6
HAO	CLO	2
HAO	NIFSTD	45
HAO	MP	1
HAO	MO	1
HAO	CL	89
HAO	MIRO	1
HAO	RADLEX	101
HAO	NPO	3
HAO	IDO	3
HAO	NCIT	218
HAO	NIFDYS	10
HAO	IAO	1
HAO	ICNP	17
HAO	NIFCELL	12
HAO	UBERON	138
HAO	TEDDY	1
HAO	ICF	2
HAO	SWO	3
HAO	OGMS	1
HAO	CTCAE	1
HAO	FLU	3
HAO	TOK	1
HAO	MEDDRA	3
HAO	RXNORM	3
HAO	NDDF	3
HAO	RCD	71
HAO	ICPC2P	1
HAO	AI-RHEUM	1
HAO	MCBCC	5
HAO	GFO	2
HAO	GFO-BIO	5
HAO	CHEMINF	1
HAO	HL7	9
HAO	ICD11-BODYSYSTEM	3
HAO	OAE	54
HAO	PLATSTG	1
HAO	PMA	7
HAO	RNAO	1
HAO	OMIT	2
HAO	GO-EXT	5
HAO	CCO	15
HAO	INO	2
HAO	ICD10	13
HAO	EHDAA2	68
HAO	NEUMORE	1
HAO	CRISP	58
HAO	VANDF	2
HAO	HUGO	1
HAO	SIO	6
HAO	BAO	6
HAO	IDOBRU	6
HAO	NIGO	3
HAO	DDI	2
HAO	PHARE	2
HAO	ICD10CM	2
HAO	VSAO	58
HAO	COGPO	1
HAO	PVONTO	1
HAO	AEO	59
HAO	HPIO	5
HAO	VHOG	42
HAO	EXO	3
HAO	CAO	1
HAO	MMO	1
HAO	PO	20
HAO	ONTODT	1
HAO	BDO	8
HAO	ONTODM-CORE	1
HAO	UNITSONT	1
HAO	SDO	18
HAO	SHR	1
HAO	MFOEM	1
HAO	NEOMARK4	1
HAO	FYPO	3
HAO	ERO	6
HAO	RH-MESH	108
HAO	BIOMODELS	93
HAO	SPTO	1
HAO	CANCO	1
HAO	PHENX	1
HAO	RPO	1
HAO	OBIWS	2
HAO	NIFSUBCELL	5
HAO	ONSTR	1
HAO	MIRNAO	2
HAO	NTDO	7
HAO	ONTOKBCF	3
HAO	SWEET	29
HAO	IDODEN	11
HAO	MEDO	1
HAO	ONTOPNEUMO	17
HAO	IFAR	15
HAO	TOP-MENELAS	2
HAO	PATHLEX	8
HAO	ICD09	1
HAO	HINO	2
HAO	PORO	20
HAO	TRAK	16
TGMA	CBO	1
TGMA	MESH	41
TGMA	ECG	6
TGMA	PR	4
TGMA	MA	15
TGMA	TADS	42
TGMA	OBI	6
TGMA	BT	3
TGMA	BSPO	8
TGMA	GO	9
TGMA	EFO	56
TGMA	BTO	36
TGMA	MAT	21
TGMA	CARO	30
TGMA	NEMO	5
TGMA	BIRNLEX	5
TGMA	TAO	74
TGMA	HAO	162
TGMA	BHO	2
TGMA	EHDAA	8
TGMA	ZFA	35
TGMA	LOINC	33
TGMA	GRO	2
TGMA	PATO	2
TGMA	WB-BT	7
TGMA	ZEA	2
TGMA	PDQ	4
TGMA	OPL	2
TGMA	CPRO	4
TGMA	COSTART	2
TGMA	BCGO	3
TGMA	SNOMEDCT	89
TGMA	EHDA	25
TGMA	XAO	37
TGMA	IDOMAL	6
TGMA	FB-BT	135
TGMA	NCBITAXON	9
TGMA	FAO	1
TGMA	GALEN	36
TGMA	ACGT-MO	8
TGMA	SPD	21
TGMA	OMIM	7
TGMA	SPO	4
TGMA	EP	3
TGMA	VO	3
TGMA	PROPREO	1
TGMA	PPIO	1
TGMA	DDANAT	3
TGMA	SAO	9
TGMA	NIFSTD	35
TGMA	MO	2
TGMA	CL	62
TGMA	RADLEX	46
TGMA	NPO	1
TGMA	IDO	2
TGMA	NCIT	106
TGMA	NIFDYS	8
TGMA	ICNP	5
TGMA	NIFCELL	11
TGMA	UBERON	69
TGMA	TEDDY	1
TGMA	ICF	1
TGMA	FLU	1
TGMA	MEDDRA	2
TGMA	RXNORM	3
TGMA	RCD	30
TGMA	MCBCC	2
TGMA	GFO-BIO	3
TGMA	CHEMINF	1
TGMA	HL7	1
TGMA	OAE	28
TGMA	PMA	3
TGMA	OMIT	2
TGMA	GO-EXT	9
TGMA	CCO	17
TGMA	ICD10	4
TGMA	EHDAA2	36
TGMA	CRISP	20
TGMA	VANDF	1
TGMA	SIO	2
TGMA	BAO	4
TGMA	IDOBRU	4
TGMA	NIGO	4
TGMA	DDI	2
TGMA	PHARE	1
TGMA	VSAO	34
TGMA	AEO	35
TGMA	HPIO	2
TGMA	VHOG	25
TGMA	EXO	1
TGMA	MMO	1
TGMA	PO	13
TGMA	BDO	5
TGMA	UNITSONT	1
TGMA	SDO	9
TGMA	NEOMARK4	1
TGMA	FYPO	2
TGMA	ERO	5
TGMA	RH-MESH	35
TGMA	BIOMODELS	63
TGMA	SOY	1
TGMA	NIFSUBCELL	7
TGMA	NTDO	3
TGMA	ONTOKBCF	2
TGMA	SWEET	11
TGMA	IDODEN	6
TGMA	ONTOPNEUMO	13
TGMA	IFAR	8
TGMA	TOP-MENELAS	1
TGMA	PATHLEX	4
TGMA	HINO	1
TGMA	PORO	16
TGMA	TRAK	7
EHDAA	CBO	2
EHDAA	NMR	1
EHDAA	MESH	584
EHDAA	ECG	5
EHDAA	PSIMOD	3
EHDAA	PR	1
EHDAA	MA	355
EHDAA	TADS	84
EHDAA	OBI	92
EHDAA	ATMO	1
EHDAA	BT	5
EHDAA	BSPO	41
EHDAA	LHN	5
EHDAA	WB-LS	1
EHDAA	GO	3
EHDAA	EFO	415
EHDAA	OPB	1
EHDAA	SEP	1
EHDAA	MEDLINEPLUS	2
EHDAA	BTO	588
EHDAA	MAT	260
EHDAA	CARO	84
EHDAA	NEMO	55
EHDAA	FB-SP	1
EHDAA	BIRNLEX	55
EHDAA	TAO	808
EHDAA	HAO	128
EHDAA	TGMA	8
EHDAA	IMR	1
EHDAA	BHO	58
EHDAA	BRO	1
EHDAA	HP	4
EHDAA	SBO	1
EHDAA	ZFA	702
EHDAA	LOINC	394
EHDAA	GRO	1
EHDAA	PATO	33
EHDAA	WB-BT	25
EHDAA	ZEA	3
EHDAA	PDQ	1
EHDAA	OPL	14
EHDAA	NDFRT	9
EHDAA	CPRO	2
EHDAA	COSTART	57
EHDAA	BCGO	9
EHDAA	ICPC	2
EHDAA	SOPHARM	39
EHDAA	SNOMEDCT	1134
EHDAA	EHDA	138692
EHDAA	XAO	637
EHDAA	IDOMAL	3
EHDAA	PEO	1
EHDAA	MFO	223
EHDAA	FB-BT	179
EHDAA	NCBITAXON	6
EHDAA	ABA-AMB	6
EHDAA	ENVO	3
EHDAA	GALEN	479
EHDAA	BFO	1
[truncated: 31,770 more rows]

## Sheet: Dec13
Source	Target	Weight
EDAM	GEOSPECIES	4
EDAM	TEO	12
EDAM	TMO	19
EDAM	IDO	3
EDAM	FB-CV	5
EDAM	NIFDYS	13
EDAM	SIO	45
EDAM	BIRNLEX	14
EDAM	OPL	2
EDAM	BP-METADATA	3
EDAM	EDDA	3
EDAM	GFO-BIO	7
EDAM	ONTODM-KDD	2
EDAM	OGMS	2
EDAM	BRO	19
EDAM	COGAT	2
EDAM	HL7	21
EDAM	COGPO	20
EDAM	CANONT	1
EDAM	CCONT	23
EDAM	ONTOKBCF	5
EDAM	MAO	11
EDAM	EFO	30
EDAM	GENE-CDS	1
EDAM	ICF	1
EDAM	LHN	2
EDAM	PEO	2
EDAM	VARIO	2
EDAM	OCRE	7
EDAM	NTDO	6
EDAM	GLYCO	5
EDAM	RCTONT	1
EDAM	PAE	1
EDAM	CANCO	5
EDAM	OMRSE	2
EDAM	TRAK	7
EDAM	DDI	11
EDAM	MEDDRA	13
EDAM	NMR	7
EDAM	SuicidO	2
EDAM	TOP-MENELAS	2
EDAM	CDAO	3
EDAM	IXNO	2
EDAM	NDDF	8
EDAM	ICD9CM	6
EDAM	PR	9
EDAM	BIOMODELS	16
EDAM	BDO	9
EDAM	OBIWS	14
EDAM	CHEBI	1
EDAM	QUDT	3
EDAM	ONTODM-CORE	16
EDAM	BCO	2
EDAM	MMO	1
EDAM	ERO	47
EDAM	GEXO	22
EDAM	CNO	5
EDAM	CHEMINF	14
EDAM	GFO	1
EDAM	RS	1
EDAM	CAO	1
EDAM	CHD	338
EDAM	MIXSCV	2
EDAM	OAE	3
EDAM	ICPC2P	8
EDAM	RSA	2
EDAM	PHARE	4
EDAM	XEO	2
EDAM	RH-MESH	104
EDAM	GRO-CPGA	1
EDAM	HUGO	1
EDAM	WHO-ART	5
EDAM	BHO	3
EDAM	BP	5
EDAM	MCCV	1
EDAM	NCIT	185
EDAM	AI-RHEUM	3
EDAM	MDDB	5
EDAM	COSTART	3
EDAM	SPO	1
EDAM	MO	7
EDAM	NONRCTO	1
EDAM	OntoVIP	15
EDAM	ADO	11
EDAM	REXO	19
EDAM	IDODEN	7
EDAM	LOINC	41
EDAM	IMGT-ONTOLOGY	6
EDAM	OMIT	3
EDAM	MESH	92
EDAM	VO	8
EDAM	CLO	201
EDAM	MCCL	2
EDAM	HCPCS	5
EDAM	ICD10CM	5
EDAM	HLTHINDCTRS	1
EDAM	ICD10PCS	5
EDAM	ICD10	5
EDAM	ENVO	1
EDAM	RXNORM	3
EDAM	CRISP	66
EDAM	GRO	19
EDAM	CL	4
EDAM	HINO	14
EDAM	TAXRANK	1
EDAM	WSIO	4
EDAM	PATO	7
EDAM	NCBITAXON	13
EDAM	PPIO	8
EDAM	NIFSUBCELL	13
EDAM	SNOMEDCT	38
EDAM	ONTODT	2
EDAM	NIFSTD	104
EDAM	NEUMORE	1
EDAM	SWO	2838
EDAM	MIRNAO	11
EDAM	FB-SP	5
EDAM	IDQA	1
EDAM	GALEN	12
EDAM	BRIDG	3
EDAM	VIVO	6
EDAM	AERO	10
EDAM	SBO	9
EDAM	CCO	110
EDAM	GAZ	2
EDAM	OGI	6
EDAM	ONTOPNEUMO	2
EDAM	RCD	25
EDAM	UO	2
EDAM	BCGO	1
EDAM	NEOMARK3	2
EDAM	IDOBRU	6
EDAM	MCBCC	2
EDAM	ONL-MR-DA	14
EDAM	DERMLEX	1
EDAM	InterNano	1
EDAM	STY	5
EDAM	BT	5
EDAM	ONTOMA	4
EDAM	DIKB	4
EDAM	FYPO	13
EDAM	SHR	2
EDAM	ONSTR	6
EDAM	MF	1
EDAM	VTO	2
EDAM	PMA	12
EDAM	SBOL	3
EDAM	SAO	7
EDAM	NEMO	18
EDAM	NEOMARK4	3
EDAM	NIGO	4
EDAM	OBOE-SBC	7
EDAM	BSAO	1
EDAM	OMIM	24
EDAM	VANDF	8
EDAM	INO	16
EDAM	CSSO	2
EDAM	EP	30
EDAM	SSO	1
EDAM	MFOEM	1
EDAM	ACGT-MO	9
EDAM	TOK	16
EDAM	MIXS	1
EDAM	CHMO	8
EDAM	ECO	1
EDAM	PDO	2
EDAM	CPT	3
EDAM	ONL-DP	14
EDAM	SYN	48
EDAM	SEP	7
EDAM	RETO	16
EDAM	IAO	10
EDAM	ADW	3
EDAM	KISAO	1
EDAM	NPO	8
EDAM	PVONTO	1
EDAM	DIAGONT	1
EDAM	SWEET	33
EDAM	SNPO	23
EDAM	PORO	1
EDAM	FMA	4
EDAM	CBO	1
EDAM	CPTH	3
EDAM	CARELEX	2
EDAM	HPIO	2
EDAM	BAO	30
EDAM	CPRO	4
EDAM	ICPS	1
EDAM	suicideo	3
EDAM	NIFCELL	13
EDAM	CHEMBIO	5
EDAM	TAO	2
EDAM	OBI_BCGO	12
EDAM	PROPREO	5
EDAM	PCO	1
EDAM	SOPHARM	41
EDAM	MEDLINEPLUS	11
EDAM	NDFRT	12
EDAM	OOEVV	1
EDAM	PHYLONT	14
EDAM	GO-EXT	11
EDAM	QIBO	10
EDAM	SO	16
EDAM	OBI	24
EDAM	PDQ	23
EDAM	IFAR	1
EDAM	GO	11
EDAM	MHC	1
EDAM	ONL-MSA	11
EDAM	BOF	3
EDAM	SDO	4
EDAM	NATPRO	5
EDAM	ICPC	5
EDAM	NBO	1
EDAM	PEDTERM	3
EDAM	JERM	28
EDAM	PECO	4
EDAM	DERMO	1
EDAM	PHENX	1
EDAM	ECG	14
EDAM	PO	1
CHD	TMO	1
CHD	SIO	1
CHD	RPO	1
CHD	BIRNLEX	1
CHD	EDDA	1
CHD	CCONT	3
CHD	EFO	4
CHD	PEO	1
CHD	VARIO	1
CHD	NTDO	1
CHD	MEDDRA	9
CHD	ICD9CM	3
CHD	PR	2
CHD	BDO	6
CHD	CHEBI	1
CHD	EDAM	338
CHD	GEXO	4
CHD	CAO	1
CHD	ICPC2P	3
CHD	PHARE	1
CHD	RH-MESH	6
CHD	WHO-ART	3
CHD	MP	11
CHD	BP	1
CHD	NCIT	13
CHD	COSTART	3
CHD	MO	1
CHD	ADO	2
CHD	REXO	4
CHD	IDODEN	1
CHD	IMGT-ONTOLOGY	1
CHD	OMIT	1
CHD	MESH	9
CHD	VO	1
CHD	ICD10CM	5
CHD	ICD10	4
CHD	CRISP	3
CHD	GRO	1
CHD	SNOMEDCT	12
CHD	NIFSTD	4
CHD	MIRNAO	1
CHD	GALEN	5
CHD	SBO	1
CHD	CCO	18
CHD	OGI	1
CHD	RCD	12
CHD	NEOMARK3	1
CHD	BT	1
CHD	FYPO	1
CHD	ONSTR	1
CHD	OMIM	11
CHD	EP	1
CHD	SYN	2
CHD	RETO	4
CHD	HP	10
CHD	SNPO	1
CHD	HPIO	1
CHD	BAO	1
CHD	CHEMBIO	1
CHD	SOPHARM	7
CHD	MEDLINEPLUS	1
CHD	NDFRT	5
CHD	SO	1
CHD	OBI	338
CHD	PDQ	2
CHD	IFAR	4
CHD	MHC	1
CHD	NATPRO	2
CHD	PEDTERM	2
CHD	JERM	1
HUGO	GEOSPECIES	1
HUGO	TMO	1
HUGO	SIO	1
HUGO	FHHO	1
HUGO	ONTODM-KDD	1
HUGO	HL7	1
HUGO	COGPO	1
HUGO	EPILONT	1
HUGO	PEO	2
HUGO	OCRE	1
HUGO	NTDO	1
HUGO	GLYCO	1
HUGO	OPB	1
HUGO	MEDDRA	1
HUGO	PR	2
HUGO	BDO	21
HUGO	OBIWS	2
HUGO	ONTODM-CORE	1
HUGO	EDAM	1
HUGO	GEXO	1
HUGO	CHEMINF	1
HUGO	GFO	1
HUGO	CAO	1
HUGO	MIXSCV	1
HUGO	RSA	1
HUGO	PHARE	1
HUGO	BHO	1
HUGO	NCIT	8
HUGO	OntoVIP	2
HUGO	ADO	1
HUGO	REXO	1
HUGO	IDODEN	1
HUGO	LOINC	2
HUGO	IMGT-ONTOLOGY	2
HUGO	OMIT	1
HUGO	MESH	1
HUGO	SEDI	1
HUGO	ZFA	1
HUGO	HAO	1
HUGO	CRISP	3
HUGO	GRO	1
HUGO	SNOMEDCT	5
HUGO	ONTODT	1
HUGO	NIFSTD	5
HUGO	SWO	32880
HUGO	MIRNAO	1
HUGO	FB-SP	1
HUGO	ICD11-BODYSYSTEM	1
HUGO	CCO	1
HUGO	OGI	3
HUGO	ICECI	1
HUGO	PROVO	1
HUGO	RCD	3
HUGO	ONL-MR-DA	2
HUGO	BT	1
HUGO	DIKB	1
HUGO	FYPO	2
HUGO	SHR	1
HUGO	ONSTR	1
HUGO	SAO	1
HUGO	NEMO	1
HUGO	PTRANS	1
HUGO	NEOMARK4	1
HUGO	REPO	1
HUGO	OMIM	1
HUGO	ACGT-MO	1
HUGO	TOK	1
HUGO	ONL-DP	2
HUGO	SYN	2
HUGO	RETO	1
HUGO	NPO	1
HUGO	SWEET	1
HUGO	SNPO	3
HUGO	BAO	1
HUGO	CPRO	1
HUGO	ICPS	1
HUGO	suicideo	1
HUGO	OBI_BCGO	2
HUGO	SOPHARM	3
HUGO	SO	3
HUGO	OBI	2
HUGO	MHC	2
HUGO	ONL-MSA	2
HUGO	SDO	1
HUGO	JERM	1
HUGO	ECG	1
SWO	GEOSPECIES	7
SWO	TEO	24
SWO	TMO	30
SWO	IDO	9
SWO	FB-CV	3
SWO	NIFDYS	15
SWO	SIO	47
SWO	RPO	2
SWO	BIRNLEX	23
SWO	OPL	8
SWO	BP-METADATA	3
SWO	EDDA	4
SWO	GFO-BIO	8
SWO	ONTODM-KDD	20
SWO	OGMS	8
SWO	BRO	25
SWO	MEDO	1
SWO	COGAT	4
SWO	HL7	38
SWO	COGPO	30
SWO	AAO	2
SWO	CANONT	1
SWO	CCONT	32
SWO	ONTOKBCF	3
SWO	MAO	8
SWO	EFO	43
SWO	GENE-CDS	1
SWO	ICF	1
SWO	LHN	3
SWO	PEO	2
SWO	VARIO	2
SWO	OCRE	5
SWO	NTDO	8
SWO	GLYCO	4
SWO	RCTONT	4
SWO	OPB	1
SWO	PAE	3
SWO	CANCO	8
SWO	OMRSE	9
SWO	TRAK	10
SWO	DDI	21
SWO	MEDDRA	13
SWO	REX	1
SWO	NMR	10
SWO	SuicidO	4
SWO	TOP-MENELAS	1
SWO	CDAO	4
SWO	IXNO	1
SWO	NDDF	7
SWO	ICD9CM	4
SWO	PR	31
SWO	BIOMODELS	18
SWO	BDO	12
SWO	OBIWS	26
SWO	PMR	1
SWO	CHEBI	3
SWO	FAO	1
SWO	QUDT	4
SWO	ONTODM-CORE	52
SWO	BCO	7
SWO	MMO	1
SWO	XAO	4
SWO	ERO	408
SWO	EDAM	2838
SWO	GEXO	101
SWO	CNO	11
SWO	CHEMINF	23
SWO	GFO	4
SWO	RS	1
SWO	CAO	15
SWO	EHDA	4
SWO	MIXSCV	2
SWO	OAE	14
SWO	ICPC2P	6
SWO	RSA	1
SWO	PHARE	3
SWO	XEO	2
SWO	RH-MESH	193
SWO	TRON	2
SWO	GRO-CPGA	3
SWO	HUGO	32880
SWO	WHO-ART	5
SWO	BHO	5
SWO	MP	1
SWO	BP	5
SWO	MCCV	1
SWO	NCIT	240
SWO	AI-RHEUM	3
SWO	MDDB	3
SWO	COSTART	5
SWO	SPO	1
SWO	MO	8
SWO	NONRCTO	5
SWO	OntoVIP	22
SWO	ADO	10
SWO	REXO	96
SWO	IDODEN	20
SWO	LOINC	72
SWO	IMGT-ONTOLOGY	4
SWO	OMIT	6
SWO	MESH	150
SWO	RNAO	4
SWO	VO	16
SWO	CLO	205
SWO	MCCL	5
SWO	HCPCS	3
SWO	ICD10CM	3
SWO	HLTHINDCTRS	1
SWO	HAO	3
SWO	ICD10PCS	3
SWO	OVAE	3
SWO	ICD10	3
SWO	ENVO	2
SWO	RXNORM	5
SWO	CRISP	67
SWO	BTO	1
SWO	GRO	16
SWO	CL	4
SWO	HINO	39
SWO	VHOG	2
SWO	CABRO	1
SWO	WSIO	6
SWO	PATO	6
SWO	NCBITAXON	22
SWO	PPIO	6
SWO	NIFSUBCELL	16
SWO	SNOMEDCT	81
SWO	ONTODT	3
SWO	NIFSTD	487
SWO	NEUMORE	2
SWO	MIRNAO	11
SWO	FB-SP	4
SWO	IDQA	1
SWO	GALEN	16
SWO	BRIDG	3
SWO	VIVO	9
SWO	AERO	21
SWO	SBO	9
SWO	EHDAA	1
SWO	CCO	240
SWO	GAZ	15
SWO	OGI	10
SWO	ONTOPNEUMO	3
SWO	PROVO	2
SWO	RCD	42
SWO	UO	5
SWO	BCGO	1
SWO	NEOMARK3	2
SWO	IDOBRU	14
SWO	MCBCC	2
SWO	ROLEO	2
SWO	ONL-MR-DA	21
SWO	DERMLEX	1
SWO	InterNano	1
SWO	STY	3
SWO	BT	8
SWO	ONTOMA	2
SWO	DIKB	4
SWO	FYPO	17
SWO	SHR	2
SWO	ONSTR	14
SWO	MF	6
SWO	VTO	5
SWO	WB-BT	7
SWO	PMA	11
SWO	SBOL	2
SWO	SAO	7
SWO	NEMO	26
SWO	UNITSONT	1
SWO	NEOMARK4	9
SWO	NIGO	4
SWO	OBOE-SBC	13
SWO	REPO	1
SWO	BSAO	1
SWO	VSO	6
SWO	OMIM	149
SWO	VANDF	8
SWO	INO	24
SWO	CSSO	2
SWO	EP	25
SWO	SSO	1
SWO	UBERON	7
SWO	MFOEM	6
SWO	ACGT-MO	12
SWO	TOK	17
SWO	MIXS	1
SWO	CHMO	20
SWO	ECO	1
SWO	PDO	2
SWO	CPT	3
SWO	ONL-DP	21
SWO	SYN	51
SWO	SEP	11
SWO	RETO	90
SWO	IAO	21
SWO	ADW	3
SWO	OPE	1
SWO	KISAO	1
SWO	NPO	13
SWO	PVONTO	2
SWO	DIAGONT	3
SWO	SWEET	73
SWO	SNPO	21
SWO	PORO	1
SWO	FMA	5
SWO	CBO	1
SWO	TEDDY	1
SWO	CPTH	3
SWO	CARELEX	2
SWO	HPIO	6
SWO	BAO	31
SWO	CPRO	8
SWO	ICPS	3
SWO	suicideo	7
SWO	NIFCELL	15
SWO	CHEMBIO	5
SWO	TAO	11
SWO	VSAO	2
SWO	OBI_BCGO	28
SWO	DCO	1
SWO	PROPREO	4
SWO	PCO	6
SWO	SOPHARM	47
SWO	MEDLINEPLUS	10
SWO	NDFRT	12
SWO	OOEVV	4
SWO	PHYLONT	11
SWO	GO-EXT	8
SWO	QIBO	9
SWO	SO	16
SWO	OBI	52
SWO	PDQ	28
SWO	FB-BT	4
SWO	IFAR	2
SWO	GO	9
SWO	BFO	4
SWO	MHC	1
SWO	ONL-MSA	12
SWO	BOF	4
SWO	SDO	11
SWO	NATPRO	4
SWO	ICPC	3
SWO	NBO	60
SWO	PEDTERM	2
SWO	JERM	28
SWO	PECO	2
SWO	DERMO	1
SWO	PHENX	1
SWO	ECG	22
SWO	PO	3
TTO	BIRNLEX	2
TTO	OMRSE	2
TTO	OBIWS	2
TTO	ERO	1
TTO	RH-MESH	2
TTO	MESH	1
TTO	CRISP	1
TTO	NCBITAXON	7
TTO	NIFSTD	3
TTO	MIRNAO	1
TTO	FB-SP	1
TTO	GALEN	1
TTO	IDOBRU	2
TTO	ONSTR	2
TTO	VTO	21
TTO	OBI	2
TAXRANK	GEOSPECIES	2
TAXRANK	SIO	2
TAXRANK	BIRNLEX	23
TAXRANK	GFO-BIO	1
TAXRANK	HL7	7
TAXRANK	CCONT	1
TAXRANK	MAO	1
TAXRANK	EFO	1
TAXRANK	ICF	1
TAXRANK	TOP-MENELAS	1
TAXRANK	QUDT	1
TAXRANK	ERO	1
TAXRANK	EDAM	1
TAXRANK	PHARE	2
TAXRANK	RH-MESH	3
TAXRANK	NCIT	48
TAXRANK	MO	1
TAXRANK	OntoVIP	1
TAXRANK	LOINC	10
TAXRANK	IMGT-ONTOLOGY	2
TAXRANK	MESH	1
TAXRANK	SEDI	1
TAXRANK	CRISP	1
TAXRANK	NCBITAXON	29
TAXRANK	SNOMEDCT	11
TAXRANK	NIFSTD	4
TAXRANK	GALEN	1
TAXRANK	BRIDG	1
TAXRANK	VIVO	2
TAXRANK	ICECI	1
TAXRANK	RCD	8
TAXRANK	ONL-MR-DA	1
TAXRANK	DERMLEX	1
TAXRANK	SHR	3
TAXRANK	VTO	60
TAXRANK	NEMO	3
TAXRANK	EP	1
TAXRANK	SSO	1
TAXRANK	ATO	29
TAXRANK	TOK	1
TAXRANK	ONL-DP	1
TAXRANK	SYN	2
TAXRANK	ADW	1
TAXRANK	BSPO	1
TAXRANK	SWEET	5
TAXRANK	FMA	2
TAXRANK	OBI_BCGO	1
TAXRANK	PCO	1
TAXRANK	SOPHARM	1
TAXRANK	NDFRT	1
TAXRANK	QIBO	2
TAXRANK	OBI	1
TAXRANK	ONL-MSA	2
TAXRANK	BOF	4
TAXRANK	NATPRO	1
TAXRANK	DDANAT	1
NCBITAXON	GEOSPECIES	2
NCBITAXON	TMO	1
NCBITAXON	IDO	5
NCBITAXON	FB-CV	1
NCBITAXON	NIFDYS	1
NCBITAXON	SIO	4
NCBITAXON	RPO	10
NCBITAXON	BIRNLEX	546
NCBITAXON	OPL	28
NCBITAXON	GFO-BIO	8
NCBITAXON	PTO	1
NCBITAXON	COGAT	1
NCBITAXON	HL7	32
NCBITAXON	AAO	7
NCBITAXON	CANONT	1
NCBITAXON	CCONT	1551
NCBITAXON	ONTOKBCF	1
NCBITAXON	MAO	1
NCBITAXON	EFO	1857
NCBITAXON	GENE-CDS	45
NCBITAXON	ICF	2
NCBITAXON	LHN	1
NCBITAXON	TM-SIGNS-AND-SYMPTS	1
NCBITAXON	NTDO	41
NCBITAXON	PAE	12
NCBITAXON	SPD	9
NCBITAXON	CANCO	1
NCBITAXON	OMRSE	29
NCBITAXON	TRAK	2
NCBITAXON	MEDDRA	74
NCBITAXON	NMR	367
NCBITAXON	TOP-MENELAS	2
NCBITAXON	TGMA	10
NCBITAXON	NDDF	468
NCBITAXON	ICD9CM	34
NCBITAXON	PR	45
NCBITAXON	BIOMODELS	20
NCBITAXON	BDO	26
NCBITAXON	OBIWS	32
NCBITAXON	MAT	1
NCBITAXON	SSE	2
NCBITAXON	CHEBI	18
NCBITAXON	FAO	3
NCBITAXON	QUDT	1
NCBITAXON	ONTODM-CORE	1
NCBITAXON	XAO	6
NCBITAXON	ERO	1056
NCBITAXON	EDAM	13
NCBITAXON	GEXO	114
NCBITAXON	RS	1
NCBITAXON	CAO	3
NCBITAXON	EHDA	18
NCBITAXON	MIXSCV	9
NCBITAXON	OAE	12
NCBITAXON	ICPC2P	28
NCBITAXON	RH-MESH	3889
NCBITAXON	TRON	4
NCBITAXON	GRO-CPGA	13
NCBITAXON	AMINO-ACID	1
NCBITAXON	SPTO	2
NCBITAXON	WHO-ART	383
NCBITAXON	BHO	1
NCBITAXON	MP	8
NCBITAXON	MCCV	3
NCBITAXON	NCIT	2239
NCBITAXON	AI-RHEUM	3
NCBITAXON	MDDB	3
NCBITAXON	COSTART	17
NCBITAXON	OntoVIP	8
NCBITAXON	ADO	5
NCBITAXON	REXO	29
NCBITAXON	IDODEN	51
NCBITAXON	LOINC	1288
NCBITAXON	MPATH	2
NCBITAXON	IMGT-ONTOLOGY	4
NCBITAXON	OMIT	366
NCBITAXON	MESH	4196
NCBITAXON	VO	1128
NCBITAXON	CLO	395
NCBITAXON	MCCL	5
NCBITAXON	ZFA	6
NCBITAXON	HCPCS	3
NCBITAXON	ICD10CM	18
NCBITAXON	HLTHINDCTRS	7
NCBITAXON	HAO	27
NCBITAXON	ICD10PCS	3
NCBITAXON	ICD10	16
NCBITAXON	ENVO	1
NCBITAXON	RXNORM	743
NCBITAXON	CRISP	783
NCBITAXON	BTO	27
NCBITAXON	GRO	2
NCBITAXON	TTO	7
NCBITAXON	HINO	20
NCBITAXON	TAXRANK	29
NCBITAXON	VHOG	8
NCBITAXON	CTCAE	6
NCBITAXON	PPIO	1
NCBITAXON	NIFSUBCELL	2
NCBITAXON	SNOMEDCT	20319
NCBITAXON	ONTODT	1
NCBITAXON	NIFSTD	2038
NCBITAXON	SWO	22
NCBITAXON	MIRNAO	265
NCBITAXON	FB-SP	1473
NCBITAXON	GALEN	882
NCBITAXON	BRIDG	2
NCBITAXON	SBO	1
NCBITAXON	EHDAA	6
NCBITAXON	CCO	253
NCBITAXON	GAZ	344
NCBITAXON	ZEA	2
NCBITAXON	ICECI	1
NCBITAXON	ONTOPNEUMO	203
NCBITAXON	RCD	3650
NCBITAXON	IDOBRU	89
NCBITAXON	ROLEO	3
NCBITAXON	ONL-MR-DA	1
NCBITAXON	DERMLEX	23
NCBITAXON	STY	367
NCBITAXON	BT	3
NCBITAXON	DIKB	3
NCBITAXON	FYPO	3
NCBITAXON	SHR	6
NCBITAXON	ONSTR	32
NCBITAXON	MF	1
NCBITAXON	XCO	2
NCBITAXON	VTO	49757
NCBITAXON	WB-BT	5
NCBITAXON	PMA	24
NCBITAXON	SAO	3
NCBITAXON	NEMO	6
NCBITAXON	NEOMARK4	1
NCBITAXON	OBOE-SBC	9
NCBITAXON	VSO	1
NCBITAXON	OMIM	399
NCBITAXON	VANDF	650
NCBITAXON	CSSO	3
NCBITAXON	EP	27
NCBITAXON	SSO	3
NCBITAXON	ATO	27
NCBITAXON	UBERON	17
NCBITAXON	MFOEM	1
NCBITAXON	ACGT-MO	7
NCBITAXON	TOK	1
NCBITAXON	MFO	2
NCBITAXON	CHMO	2
NCBITAXON	PDO	2
NCBITAXON	CPT	5
NCBITAXON	ONL-DP	1
NCBITAXON	SYN	1390
NCBITAXON	SEP	1
NCBITAXON	EHDAA2	7
NCBITAXON	RETO	28
NCBITAXON	ADW	9
NCBITAXON	OPE	2
NCBITAXON	KISAO	1
NCBITAXON	NPO	3
NCBITAXON	HP	19
NCBITAXON	CO-WHEAT	1
NCBITAXON	SWEET	149
NCBITAXON	SNPO	2
NCBITAXON	ATMO	4
NCBITAXON	PORO	12
NCBITAXON	FMA	28
NCBITAXON	SYMP	6
NCBITAXON	CPTH	3
NCBITAXON	HPIO	13
NCBITAXON	BAO	60
NCBITAXON	MA	13
NCBITAXON	TAO	12
NCBITAXON	OBI_BCGO	26
NCBITAXON	PROPREO	2
NCBITAXON	PCO	1
NCBITAXON	SOPHARM	431
NCBITAXON	MEDLINEPLUS	26
NCBITAXON	NDFRT	656
NCBITAXON	PHYLONT	1
NCBITAXON	GO-EXT	4
NCBITAXON	QIBO	127
NCBITAXON	SO	5
NCBITAXON	OBI	1623
NCBITAXON	PDQ	390
NCBITAXON	FB-BT	11
NCBITAXON	IFAR	20
NCBITAXON	GO	4
NCBITAXON	MHC	20
NCBITAXON	ONL-MSA	1
NCBITAXON	BOF	6
NCBITAXON	NATPRO	61
NCBITAXON	ICPC	5
NCBITAXON	NBO	1
NCBITAXON	PEDTERM	56
NCBITAXON	PECO	290
NCBITAXON	DERMO	13
NCBITAXON	PHENX	2
NCBITAXON	ECG	1
NCBITAXON	PO	12
FB-SP	TMO	1
FB-SP	IDO	4
FB-SP	SIO	3
FB-SP	BIRNLEX	155
FB-SP	OPL	11
FB-SP	GFO-BIO	4
FB-SP	HL7	5
FB-SP	AAO	1
FB-SP	CCONT	129
FB-SP	EFO	138
FB-SP	LHN	1
FB-SP	OCRE	1
FB-SP	NTDO	2
FB-SP	OMRSE	19
FB-SP	MEDDRA	9
FB-SP	NMR	1
FB-SP	TOP-MENELAS	1
FB-SP	CDAO	1
FB-SP	NDDF	15
FB-SP	MEO	1
FB-SP	ICD9CM	7
FB-SP	PR	17
FB-SP	BIOMODELS	3
FB-SP	OBIWS	21
FB-SP	CHEBI	2
FB-SP	XAO	1
FB-SP	ERO	151
FB-SP	EDAM	5
FB-SP	GEXO	28
FB-SP	CHEMINF	3
FB-SP	CAO	1
FB-SP	EHDA	12
FB-SP	MIXSCV	1
FB-SP	ICPC2P	5
FB-SP	PHARE	2
FB-SP	RH-MESH	362
FB-SP	HUGO	1
FB-SP	WHO-ART	2
FB-SP	MCCV	3
FB-SP	NCIT	191
FB-SP	AI-RHEUM	1
FB-SP	MDDB	1
FB-SP	COSTART	1
FB-SP	ADO	1
FB-SP	REXO	26
FB-SP	IDODEN	22
FB-SP	LOINC	84
FB-SP	IMGT-ONTOLOGY	3
FB-SP	OMIT	1
FB-SP	MESH	416
FB-SP	VO	96
FB-SP	MCCL	2
FB-SP	ZFA	1
FB-SP	HCPCS	1
FB-SP	ICD10CM	2
FB-SP	ICD10PCS	1
FB-SP	ICD10	2
FB-SP	ENVO	2
FB-SP	RXNORM	18
FB-SP	CRISP	237
FB-SP	BTO	2
FB-SP	GRO	3
FB-SP	TTO	1
FB-SP	HINO	10
FB-SP	VHOG	1
FB-SP	WSIO	1
FB-SP	NCBITAXON	1473
FB-SP	SNOMEDCT	537
FB-SP	NIFSTD	266
FB-SP	SWO	4
FB-SP	MIRNAO	61
FB-SP	GALEN	135
FB-SP	EHDAA	1
FB-SP	CCO	35
FB-SP	GAZ	8
FB-SP	ONTOPNEUMO	15
FB-SP	RCD	226
FB-SP	IDOBRU	41
FB-SP	ROLEO	1
FB-SP	STY	1
FB-SP	BT	1
FB-SP	ONTOMA	1
FB-SP	FYPO	1
FB-SP	SHR	1
FB-SP	ONSTR	19
FB-SP	XCO	1
FB-SP	VTO	101
FB-SP	WB-BT	2
FB-SP	PMA	3
FB-SP	NEMO	1
FB-SP	OBOE-SBC	1
FB-SP	OMIM	1
FB-SP	VANDF	12
FB-SP	MFO	1
FB-SP	CPT	3
FB-SP	SYN	90
FB-SP	EHDAA2	1
FB-SP	RETO	23
FB-SP	ADW	1
FB-SP	SWEET	5
FB-SP	SNPO	4
FB-SP	CPTH	1
FB-SP	HPIO	5
FB-SP	BAO	25
FB-SP	MA	1
FB-SP	suicideo	1
FB-SP	TAO	1
FB-SP	OBI_BCGO	10
FB-SP	PROPREO	2
FB-SP	SOPHARM	8
FB-SP	MEDLINEPLUS	4
FB-SP	NDFRT	12
FB-SP	PHYLONT	2
FB-SP	QIBO	2
FB-SP	SO	3
FB-SP	OBI	325
FB-SP	PDQ	2
FB-SP	ONL-MSA	1
FB-SP	BOF	1
FB-SP	NATPRO	22
FB-SP	ICPC	1
FB-SP	PEDTERM	3
FB-SP	JERM	1
FB-SP	PECO	24
FB-SP	DERMO	1
VTO	GEOSPECIES	2
VTO	TMO	1
VTO	NIFDYS	1
VTO	SIO	4
VTO	RPO	1
VTO	BIRNLEX	253
VTO	OPL	4
VTO	GFO-BIO	2
VTO	HL7	18
VTO	AAO	1
VTO	CCONT	179
VTO	ONTOKBCF	1
VTO	MAO	1
VTO	EPILONT	1
VTO	EFO	191
VTO	ICF	1
VTO	LHN	1
VTO	NTDO	1
VTO	PAE	1
VTO	OMRSE	22
VTO	TRAK	1
VTO	MEDDRA	9
VTO	TOP-MENELAS	1
VTO	TGMA	1
VTO	NDDF	2
VTO	ICD9CM	1
VTO	PR	20
VTO	BIOMODELS	3
VTO	BDO	2
VTO	OBIWS	22
VTO	PMR	1
VTO	SSE	1
VTO	CHEBI	4
VTO	QUDT	1
VTO	ERO	158
VTO	EDAM	2
VTO	GEXO	25
VTO	EHDA	1
VTO	MIXSCV	6
VTO	ICPC2P	2
VTO	XEO	1
VTO	RH-MESH	569
VTO	TRON	1
VTO	GRO-CPGA	1
VTO	WHO-ART	2
VTO	MP	2
VTO	NCIT	130
VTO	COSTART	2
VTO	MO	1
VTO	OntoVIP	3
VTO	ADO	3
VTO	REXO	16
VTO	IDODEN	4
VTO	LOINC	50
VTO	IMGT-ONTOLOGY	4
VTO	MESH	520
VTO	VO	65
VTO	SEDI	1
VTO	MCCL	2
VTO	ZFA	1
VTO	ICD10CM	1
VTO	HLTHINDCTRS	3
VTO	HAO	5
VTO	RXNORM	10
VTO	CRISP	108
VTO	BTO	3
VTO	TTO	21
VTO	HINO	2
VTO	TAXRANK	60
VTO	VHOG	1
VTO	CTCAE	1
VTO	NCBITAXON	49756
VTO	SNOMEDCT	5132
VTO	NIFSTD	421
VTO	SWO	5
VTO	MIRNAO	52
VTO	FB-SP	101
VTO	GALEN	177
VTO	BRIDG	2
VTO	VIVO	1
VTO	EHDAA	1
VTO	CCO	70
VTO	GAZ	122
VTO	ZEA	1
VTO	ICECI	1
VTO	RCD	145
VTO	IDOBRU	59
VTO	ROLEO	4
VTO	ONL-MR-DA	2
VTO	DERMLEX	2
VTO	BT	1
VTO	SHR	4
VTO	ONSTR	22
VTO	XCO	1
VTO	WB-BT	2
VTO	PMA	9
VTO	NEMO	4
VTO	OBOE-SBC	1
VTO	OMIM	8
VTO	VANDF	2
VTO	EP	6
VTO	SSO	1
VTO	ATO	1016
VTO	ACGT-MO	2
VTO	TOK	2
VTO	CHMO	1
VTO	ONL-DP	1
VTO	SYN	37
VTO	EHDAA2	1
VTO	RETO	15
VTO	ADW	1
VTO	HP	3
VTO	BSPO	1
VTO	BNO	1
VTO	SWEET	12
VTO	ATMO	1
VTO	PORO	3
VTO	FMA	7
VTO	SYMP	2
VTO	HPIO	2
VTO	BAO	12
VTO	MA	1
VTO	TAO	2
VTO	OBI_BCGO	14
VTO	PCO	1
VTO	SOPHARM	7
VTO	MEDLINEPLUS	2
VTO	NDFRT	7
VTO	QIBO	4
VTO	OBI	204
VTO	PDQ	3
VTO	IFAR	1
VTO	ONL-MSA	3
VTO	BOF	4
VTO	SDO	1
VTO	NATPRO	3
VTO	PEDTERM	1
VTO	PECO	4
VTO	DERMO	2
VTO	PO	1
ATO	GEOSPECIES	1
ATO	TMO	1
ATO	SIO	3
ATO	BIRNLEX	21
ATO	GFO-BIO	1
ATO	HL7	4
ATO	MAO	1
ATO	EFO	5
ATO	ICF	1
ATO	TOP-MENELAS	1
ATO	BDO	1
ATO	QUDT	1
ATO	XAO	1
ATO	ERO	5
ATO	GEXO	1
ATO	PHARE	1
ATO	RH-MESH	1
ATO	BHO	1
ATO	NCIT	31
ATO	OntoVIP	1
ATO	ADO	1
ATO	REXO	1
ATO	LOINC	9
ATO	IMGT-ONTOLOGY	2
ATO	MESH	1
ATO	ZFA	1
ATO	CRISP	3
ATO	TAXRANK	29
ATO	APO	1
ATO	NCBITAXON	27
ATO	SNOMEDCT	9
ATO	NIFSTD	6
ATO	GALEN	2
ATO	BRIDG	1
ATO	VIVO	1
ATO	CCO	2
ATO	ICECI	1
ATO	RCD	5
ATO	ONL-MR-DA	1
ATO	DERMLEX	1
ATO	SHR	1
ATO	VTO	1016
ATO	NEMO	3
ATO	OMIM	1
ATO	EP	1
ATO	SSO	1
ATO	TOK	1
ATO	ONL-DP	1
ATO	SYN	2
ATO	RETO	1
ATO	ADW	1
ATO	BSPO	1
ATO	SWEET	4
ATO	FMA	1
ATO	suicideo	1
ATO	TAO	1
ATO	PCO	1
ATO	SOPHARM	1
ATO	NDFRT	1
ATO	QIBO	1
ATO	PDQ	1
ATO	ONL-MSA	2
ATO	BOF	4
ATO	SDO	1
ATO	NATPRO	1
ATO	PEDTERM	1
ATO	DDANAT	1
ATO	PHENX	1
PECO	TMO	3
PECO	IDO	1
PECO	FB-CV	81
PECO	SIO	4
PECO	BIRNLEX	9
PECO	OPL	3
PECO	GFO-BIO	3
PECO	HL7	3
PECO	AAO	1
PECO	CCONT	35
PECO	ONTOKBCF	1
PECO	EFO	41
PECO	ICF	1
PECO	NTDO	4
PECO	OPB	1
PECO	OMRSE	2
PECO	TRAK	1
PECO	MEDDRA	8
PECO	NMR	1
PECO	TOP-MENELAS	1
PECO	NDDF	15
PECO	MEO	4
PECO	ICD9CM	4
PECO	PR	1
PECO	BIOMODELS	24
PECO	OBIWS	3
PECO	CHEBI	29
PECO	XAO	1
PECO	ERO	15
PECO	EDAM	4
PECO	GEXO	2
PECO	RS	2
PECO	CAO	1
PECO	MIXSCV	1
PECO	ICPC2P	5
PECO	PHARE	3
PECO	XEO	1
PECO	RH-MESH	113
PECO	WHO-ART	3
PECO	BHO	1
PECO	BP	1
PECO	MCCV	2
PECO	NCIT	67
PECO	AI-RHEUM	3
PECO	MDDB	3
PECO	COSTART	3
PECO	MO	1
PECO	ADO	4
PECO	REXO	5
PECO	IDODEN	7
PECO	LOINC	47
PECO	OMIT	2
PECO	MESH	107
PECO	VO	9
PECO	MCCL	1
PECO	HCPCS	3
PECO	ICD10CM	4
PECO	HLTHINDCTRS	1
PECO	ICD10PCS	3
PECO	ICD10	4
PECO	ENVO	2
PECO	RXNORM	18
PECO	CRISP	58
PECO	GRO	2
PECO	HINO	5
PECO	NCBITAXON	290
PECO	PPIO	1
PECO	SNOMEDCT	77
PECO	NIFSTD	40
PECO	SWO	2
PECO	MIRNAO	9
PECO	FB-SP	24
PECO	GALEN	32
PECO	CCO	10
PECO	OGI	1
PECO	ONTOPNEUMO	2
PECO	RCD	50
PECO	IDOBRU	6
PECO	MCBCC	1
PECO	STY	3
PECO	BT	4
PECO	ONTOMA	1
PECO	DIKB	1
PECO	FYPO	8
PECO	ONSTR	4
PECO	XCO	3
PECO	VTO	4
PECO	WB-BT	1
PECO	PMA	3
PECO	SAO	1
PECO	NEMO	2
PECO	OMIM	5
PECO	VANDF	19
PECO	INO	1
PECO	SSO	1
PECO	ACGT-MO	2
PECO	CPT	4
PECO	SYN	13
PECO	RETO	5
PECO	NPO	7
PECO	SWEET	16
PECO	SNPO	2
PECO	CPTH	3
PECO	HPIO	2
PECO	BAO	6
PECO	RNPRIO	1
PECO	CHEMBIO	1
PECO	OBI_BCGO	3
PECO	PROPREO	1
PECO	SOPHARM	70
PECO	MEDLINEPLUS	5
PECO	NDFRT	37
PECO	GO-EXT	2
PECO	QIBO	4
PECO	SO	2
PECO	OBI	22
PECO	PDQ	18
PECO	IFAR	1
PECO	GO	2
PECO	MHC	1
PECO	NATPRO	4
PECO	ICPC	3
PECO	PEDTERM	2
PECO	JERM	1
EDDA	TMO	1
EDDA	FB-CV	8
EDDA	SIO	7
EDDA	BIRNLEX	2
EDDA	BP-METADATA	2
EDDA	BRO	3
EDDA	HL7	4
EDDA	CCONT	3
EDDA	EFO	3
EDDA	OCRE	2
EDDA	CANCO	1
EDDA	BIOMODELS	1
EDDA	ERO	8
EDDA	EDAM	3
EDDA	CNO	1
EDDA	CHD	1
EDDA	RH-MESH	122
EDDA	NCIT	44
EDDA	AI-RHEUM	1
EDDA	MO	1
EDDA	OntoVIP	4
EDDA	ADO	18
EDDA	LOINC	5
EDDA	MESH	65
EDDA	CRISP	13
EDDA	SNOMEDCT	2
EDDA	NIFSTD	18
EDDA	SWO	4
EDDA	VIVO	8
EDDA	RCD	1
EDDA	NEOMARK3	1
EDDA	ROLEO	1
EDDA	ONL-MR-DA	3
EDDA	PMA	6
EDDA	SAO	1
EDDA	NEMO	3
EDDA	ACGT-MO	3
EDDA	ONL-DP	3
EDDA	SYN	25
EDDA	DIAGONT	2
EDDA	SWEET	5
EDDA	SNPO	1
EDDA	CTONT	1
EDDA	CPRO	1
EDDA	suicideo	8
EDDA	SOPHARM	4
EDDA	PHYLONT	1
EDDA	QIBO	1
EDDA	SO	1
EDDA	OBI	2
EDDA	ONL-MSA	2
EDDA	SDO	1
EDDA	PEDTERM	1
EDDA	JERM	2
EDDA	ECG	2
NDDF	GEOSPECIES	2
NDDF	TEO	3
NDDF	TMO	6
NDDF	IDO	4
NDDF	FB-CV	10
NDDF	NIFDYS	8
NDDF	SIO	15
NDDF	PSIMOD	5
NDDF	BIRNLEX	12
NDDF	OPL	6
NDDF	GFO-BIO	13
NDDF	FHHO	1
NDDF	OGMS	1
NDDF	BRO	3
NDDF	COGAT	1
NDDF	HL7	86
NDDF	COGPO	2
NDDF	AAO	11
NDDF	CANONT	3
NDDF	CCONT	312
NDDF	ONTOKBCF	46
NDDF	MAO	3
NDDF	EFO	223
NDDF	GENE-CDS	5
NDDF	ICF	1
NDDF	LHN	5
NDDF	VARIO	1
NDDF	OCRE	5
NDDF	NTDO	29
NDDF	GLYCO	1
NDDF	OPB	1
NDDF	SPD	2
NDDF	CANCO	3
NDDF	OMRSE	3
NDDF	TRAK	22
NDDF	DDI	1
NDDF	MEDDRA	190
NDDF	NMR	8
NDDF	SuicidO	7
NDDF	TOP-MENELAS	6
NDDF	TGMA	4
NDDF	IXNO	1
NDDF	MEO	9
NDDF	ICD9CM	135
NDDF	PR	13
NDDF	BIOMODELS	610
NDDF	BDO	6
NDDF	OBIWS	10
NDDF	MAT	1
NDDF	PMR	4
NDDF	CHEBI	882
NDDF	QUDT	1
NDDF	ONTODM-CORE	2
NDDF	BCO	1
NDDF	TADS	3
NDDF	PATHLEX	1
NDDF	XAO	11
NDDF	ERO	48
NDDF	EDAM	8
NDDF	GEXO	22
NDDF	CNO	1
NDDF	CHEMINF	2
NDDF	GFO	2
NDDF	FBbi	3
NDDF	CAO	2
NDDF	EHDA	6
NDDF	MIXSCV	5
NDDF	OAE	6
NDDF	ICPC2P	140
NDDF	PHARE	15
NDDF	XEO	14
NDDF	RH-MESH	4901
NDDF	TRON	5
NDDF	AMINO-ACID	13
NDDF	SPTO	4
NDDF	WHO-ART	135
NDDF	BHO	10
NDDF	BP	1
NDDF	LSM	1
NDDF	NCIT	3783
NDDF	AI-RHEUM	135
NDDF	MDDB	7366
NDDF	COSTART	139
NDDF	SPO	8
NDDF	MO	4
NDDF	OntoVIP	26
NDDF	ADO	132
NDDF	REXO	14
NDDF	IDODEN	27
NDDF	LOINC	1765
NDDF	IMGT-ONTOLOGY	2
NDDF	OMIT	13
NDDF	MESH	3692
NDDF	RNAO	1
NDDF	VO	19
NDDF	CLO	123
NDDF	MCCL	16
NDDF	ZFA	4
NDDF	HCPCS	158
NDDF	ICD10CM	134
NDDF	HLTHINDCTRS	1
NDDF	HAO	7
NDDF	ICD10PCS	134
NDDF	OVAE	1
NDDF	ICD10	136
NDDF	ENVO	6
NDDF	RXNORM	28897
NDDF	CRISP	858
NDDF	BTO	33
NDDF	GRO	21
NDDF	IDOMAL	5
NDDF	CL	5
NDDF	HINO	140
NDDF	VHOG	8
NDDF	CABRO	1
NDDF	PATO	3
NDDF	NCBITAXON	468
NDDF	PPIO	4
NDDF	NIFSUBCELL	9
NDDF	SNOMEDCT	9115
NDDF	NIFSTD	120
NDDF	NEUMORE	1
NDDF	SWO	7
NDDF	MIRNAO	4
NDDF	FB-SP	15
NDDF	GALEN	1379
NDDF	BRIDG	7
NDDF	ICD11-BODYSYSTEM	1
NDDF	VIVO	3
NDDF	AERO	2
NDDF	SBO	2
NDDF	EHDAA	3
NDDF	CCO	53
NDDF	GAZ	18
NDDF	VT	1
NDDF	ZEA	1
NDDF	OGI	3
NDDF	ONTOPNEUMO	15
NDDF	PROVO	3
NDDF	RCD	4554
NDDF	UO	1
NDDF	BCGO	5
NDDF	IDOBRU	8
NDDF	MCBCC	11
NDDF	ROLEO	1
NDDF	ONL-MR-DA	6
NDDF	DERMLEX	3
NDDF	STY	134
NDDF	BT	29
NDDF	ONTOMA	3
NDDF	DIKB	2
NDDF	FYPO	31
NDDF	ONSTR	36
NDDF	MF	5
NDDF	XCO	26
NDDF	VTO	2
NDDF	WB-BT	5
NDDF	PMA	15
NDDF	SAO	6
NDDF	NEMO	4
NDDF	CARO	3
NDDF	NEOMARK4	2
NDDF	NIGO	6
NDDF	OBOE-SBC	22
NDDF	BSAO	4
NDDF	VSO	4
NDDF	OMIM	146
NDDF	VANDF	11669
NDDF	INO	2
NDDF	EP	59
NDDF	UBERON	11
NDDF	MFOEM	5
NDDF	ACGT-MO	29
NDDF	TOK	3
NDDF	MIXS	1
NDDF	MFO	1
NDDF	ELIG	1
NDDF	CHMO	1
NDDF	PDO	1
NDDF	CPT	180
NDDF	ONL-DP	4
NDDF	SYN	67
NDDF	SEP	5
NDDF	EHDAA2	6
NDDF	AEO	5
NDDF	RETO	14
NDDF	IAO	1
NDDF	ADW	5
NDDF	OPE	2
NDDF	NPO	81
NDDF	PVONTO	1
NDDF	MIRO	3
NDDF	BNO	3
NDDF	SWEET	35
NDDF	SNPO	18
NDDF	ATMO	4
NDDF	PORO	5
NDDF	FMA	51
NDDF	CBO	1
NDDF	CPTH	134
NDDF	HPIO	8
NDDF	BAO	39
NDDF	MA	7
NDDF	CPRO	5
NDDF	ICPS	3
NDDF	suicideo	7
NDDF	NIFCELL	8
NDDF	CHEMBIO	2
NDDF	TAO	10
NDDF	VSAO	5
NDDF	OBI_BCGO	12
NDDF	DCO	2
NDDF	PROPREO	6
NDDF	PCO	3
NDDF	SOPHARM	451
NDDF	MEDLINEPLUS	157
NDDF	NDFRT	12328
NDDF	PHYLONT	1
NDDF	GO-EXT	7
NDDF	QIBO	19
NDDF	SO	16
NDDF	OBI	50
NDDF	GCO	1
NDDF	PDQ	348
NDDF	FB-BT	7
NDDF	IFAR	6
NDDF	GO	7
NDDF	BFO	1
NDDF	MHC	133
NDDF	ONL-MSA	6
NDDF	BOF	7
NDDF	SDO	65
NDDF	NATPRO	13
NDDF	ICPC	134
NDDF	NBO	1
NDDF	PEDTERM	20
NDDF	DDANAT	1
NDDF	JERM	3
NDDF	PECO	15
NDDF	DERMO	1
NDDF	ECG	2
RH-MESH	GEOSPECIES	5
RH-MESH	TEO	22
RH-MESH	TMO	35
RH-MESH	IDO	28
RH-MESH	FB-CV	80
RH-MESH	NIFDYS	196
RH-MESH	SIO	186
RH-MESH	PSIMOD	138
RH-MESH	RPO	1145
RH-MESH	BIRNLEX	450
RH-MESH	PW	7
RH-MESH	OPL	29
RH-MESH	BP-METADATA	2
RH-MESH	EDDA	122
RH-MESH	GFO-BIO	13
RH-MESH	FHHO	20
RH-MESH	ONTODM-KDD	2
RH-MESH	OGMS	11
RH-MESH	BRO	26
RH-MESH	PTO	1
RH-MESH	COGAT	69
RH-MESH	HL7	339
RH-MESH	COGPO	13
RH-MESH	AAO	151
RH-MESH	CANONT	6
RH-MESH	CCONT	2317
RH-MESH	ONTOKBCF	70
RH-MESH	MAO	8
RH-MESH	EPILONT	9
RH-MESH	EFO	5221
RH-MESH	GENE-CDS	444
RH-MESH	ICF	199
RH-MESH	LHN	7
RH-MESH	PEO	8
RH-MESH	VARIO	73
RH-MESH	OCRE	11
RH-MESH	TM-SIGNS-AND-SYMPTS	128
RH-MESH	NTDO	22
RH-MESH	GLYCO	5
RH-MESH	RCTONT	1
RH-MESH	OPB	6
RH-MESH	PAE	33
RH-MESH	SPD	32
RH-MESH	CANCO	8
RH-MESH	OMRSE	6
RH-MESH	TRAK	342
RH-MESH	DDI	3
RH-MESH	MEDDRA	3080
RH-MESH	REX	42
RH-MESH	NMR	11
RH-MESH	SuicidO	46
RH-MESH	TOP-MENELAS	15
RH-MESH	CDAO	3
RH-MESH	TGMA	40
RH-MESH	IXNO	21
RH-MESH	NDDF	4901
RH-MESH	MEO	41
RH-MESH	ICD9CM	830
RH-MESH	PR	3538
RH-MESH	BIOMODELS	2874
RH-MESH	BDO	948
RH-MESH	OBIWS	13
RH-MESH	MAT	20
RH-MESH	PMR	10
RH-MESH	SSE	175
RH-MESH	CHEBI	6912
RH-MESH	FAO	1
RH-MESH	ONTODM-CORE	9
RH-MESH	BCO	2
RH-MESH	MMO	23
RH-MESH	TADS	2
RH-MESH	PATHLEX	54
RH-MESH	XAO	308
RH-MESH	ERO	632
RH-MESH	WB-PHENOTYPE	10
RH-MESH	EDAM	104
RH-MESH	GEXO	2150
RH-MESH	CNO	3
RH-MESH	CHEMINF	8
RH-MESH	GFO	3
RH-MESH	FBbi	43
RH-MESH	RS	82
RH-MESH	CAO	6
RH-MESH	EHDA	1466
RH-MESH	CHD	6
RH-MESH	MIXSCV	219
RH-MESH	OAE	123
RH-MESH	ICPC2P	2271
RH-MESH	RSA	3
RH-MESH	PHARE	37
RH-MESH	XEO	104
RH-MESH	TRON	55
RH-MESH	GRO-CPGA	33
RH-MESH	AMINO-ACID	18
RH-MESH	SPTO	41
RH-MESH	WHO-ART	1945
RH-MESH	BHO	92
RH-MESH	MP	695
RH-MESH	BP	4
RH-MESH	LSM	45
RH-MESH	MCCV	5
RH-MESH	NCIT	18236
RH-MESH	AI-RHEUM	81
RH-MESH	MDDB	52
RH-MESH	COSTART	1527
RH-MESH	SPO	134
RH-MESH	MO	18
RH-MESH	NONRCTO	2
RH-MESH	OntoVIP	542
RH-MESH	ADO	325
RH-MESH	REXO	1863
RH-MESH	IDODEN	353
RH-MESH	LOINC	6218
RH-MESH	pseudo	2
RH-MESH	MPATH	70
RH-MESH	IMGT-ONTOLOGY	8
RH-MESH	OMIT	23
RH-MESH	MESH	251322
RH-MESH	RNAO	2
RH-MESH	VO	909
RH-MESH	CLO	8
RH-MESH	MCCL	205
RH-MESH	OGR	35
RH-MESH	ZFA	427
RH-MESH	HCPCS	83
RH-MESH	ICD10CM	1404
RH-MESH	HLTHINDCTRS	89
RH-MESH	FB-DV	4
RH-MESH	HAO	50
RH-MESH	ICD10PCS	13
RH-MESH	CMO	35
RH-MESH	OVAE	83
RH-MESH	ICD10	783
RH-MESH	ENVO	34
RH-MESH	RXNORM	6816
RH-MESH	CRISP	8447
RH-MESH	BTO	364
RH-MESH	GRO	78
RH-MESH	IDOMAL	27
RH-MESH	CL	73
RH-MESH	TTO	2
RH-MESH	HINO	893
RH-MESH	TAXRANK	3
RH-MESH	VHOG	447
RH-MESH	CABRO	3
RH-MESH	WSIO	4
RH-MESH	PATO	60
RH-MESH	CTCAE	210
RH-MESH	APO	17
RH-MESH	NCBITAXON	3888
RH-MESH	PPIO	83
RH-MESH	NIFSUBCELL	81
RH-MESH	SNOMEDCT	32231
RH-MESH	ONTODT	1
RH-MESH	NIFSTD	6562
RH-MESH	SOY	3
RH-MESH	NEUMORE	1
RH-MESH	SWO	193
RH-MESH	MEGO	1
RH-MESH	MIRNAO	87
RH-MESH	FB-SP	362
RH-MESH	IDQA	5
RH-MESH	GALEN	3097
RH-MESH	BRIDG	4
RH-MESH	ICD11-BODYSYSTEM	11
RH-MESH	VIVO	41
RH-MESH	AERO	37
RH-MESH	SBO	88
RH-MESH	EHDAA	396
RH-MESH	CCO	3502
RH-MESH	GAZ	502
RH-MESH	VT	70
RH-MESH	ZEA	4
RH-MESH	OGI	14
RH-MESH	ONTOPNEUMO	127
RH-MESH	PROVO	4
RH-MESH	RCD	7540
RH-MESH	UO	24
RH-MESH	BCGO	4
RH-MESH	NEOMARK3	2
RH-MESH	IDOBRU	137
RH-MESH	MCBCC	85
RH-MESH	ROLEO	5
RH-MESH	ONL-MR-DA	12
RH-MESH	DERMLEX	689
RH-MESH	InterNano	26
RH-MESH	STY	33
RH-MESH	BT	16
RH-MESH	ONTOMA	5
RH-MESH	EMAP	78
RH-MESH	DIKB	7
RH-MESH	FYPO	487
RH-MESH	SHR	159
RH-MESH	ONSTR	116
RH-MESH	MF	39
RH-MESH	XCO	248
RH-MESH	VTO	569
RH-MESH	WB-BT	294
RH-MESH	PMA	445
RH-MESH	SAO	380
RH-MESH	NEMO	96
RH-MESH	MDCDRG	7
RH-MESH	CARO	1
RH-MESH	NEOMARK4	13
RH-MESH	NIGO	121
RH-MESH	OBOE-SBC	37
RH-MESH	REPO	7
RH-MESH	BSAO	8
RH-MESH	VSO	43
RH-MESH	OMIM	7104
RH-MESH	VANDF	5110
RH-MESH	INO	23
RH-MESH	CSSO	174
RH-MESH	EP	717
RH-MESH	SSO	120
RH-MESH	ATO	1
RH-MESH	UBERON	848
RH-MESH	MFOEM	64
RH-MESH	ACGT-MO	216
RH-MESH	TOK	15
RH-MESH	MIXS	1
RH-MESH	MFO	44
RH-MESH	ELIG	6
RH-MESH	CHMO	144
RH-MESH	PDO	153
RH-MESH	CPT	397
RH-MESH	ONL-DP	11
RH-MESH	SYN	3502
RH-MESH	SEP	26
RH-MESH	EHDAA2	154
RH-MESH	AEO	22
RH-MESH	RETO	1681
RH-MESH	IAO	6
RH-MESH	ADW	30
RH-MESH	OPE	79
RH-MESH	KISAO	5
RH-MESH	NPO	255
RH-MESH	PVONTO	1
RH-MESH	HP	1067
RH-MESH	ABA-AMB	27
RH-MESH	MIRO	77
RH-MESH	BNO	8
RH-MESH	GRO-CPD	10
RH-MESH	DIAGONT	3
RH-MESH	SWEET	888
RH-MESH	SNPO	193
RH-MESH	CTONT	2
RH-MESH	ATMO	52
RH-MESH	ATOL	57
RH-MESH	PORO	13
RH-MESH	FMA	631
RH-MESH	SYMP	590
RH-MESH	CBO	23
RH-MESH	TEDDY	5
RH-MESH	CPTH	20
RH-MESH	CARELEX	7
RH-MESH	HPIO	33
RH-MESH	BAO	239
RH-MESH	MA	346
RH-MESH	RNPRIO	10
RH-MESH	CPRO	2
RH-MESH	ICPS	13
RH-MESH	suicideo	143
RH-MESH	NIFCELL	57
RH-MESH	CHEMBIO	18
RH-MESH	TAO	503
RH-MESH	VSAO	42
RH-MESH	OBI_BCGO	234
RH-MESH	WB-LS	5
RH-MESH	DCO	3
RH-MESH	PROPREO	9
RH-MESH	PCO	16
RH-MESH	SOPHARM	8222
RH-MESH	MEDLINEPLUS	1770
RH-MESH	NDFRT	40641
RH-MESH	PHYLONT	10
RH-MESH	GO-EXT	478
RH-MESH	QIBO	109
RH-MESH	SO	270
RH-MESH	OBI	591
RH-MESH	GCO	1
RH-MESH	PDQ	2112
RH-MESH	FB-BT	105
RH-MESH	IFAR	511
RH-MESH	GO	530
RH-MESH	BFO	1
RH-MESH	MHC	403
RH-MESH	ONL-MSA	16
RH-MESH	BOF	11
RH-MESH	SDO	327
RH-MESH	NATPRO	1472
RH-MESH	ICPC	111
RH-MESH	NBO	57
RH-MESH	PEDTERM	350
RH-MESH	JERM	33
RH-MESH	PECO	113
RH-MESH	DERMO	621
RH-MESH	PHENX	35
RH-MESH	ECG	19
RH-MESH	PO	33
MDDB	GEOSPECIES	2
MDDB	TEO	2
MDDB	TMO	6
MDDB	IDO	4
MDDB	FB-CV	1
MDDB	NIFDYS	6
MDDB	SIO	11
MDDB	BIRNLEX	9
MDDB	OPL	6
MDDB	GFO-BIO	12
MDDB	FHHO	1
MDDB	OGMS	1
MDDB	BRO	3
MDDB	COGAT	1
MDDB	HL7	12
MDDB	COGPO	2
MDDB	AAO	4
MDDB	CANONT	3
MDDB	CCONT	15
MDDB	ONTOKBCF	35
MDDB	MAO	3
MDDB	EFO	19
MDDB	GENE-CDS	1
MDDB	ICF	1
MDDB	LHN	3
MDDB	OCRE	5
MDDB	NTDO	29
MDDB	GLYCO	1
MDDB	OPB	1
MDDB	CANCO	3
MDDB	OMRSE	3
MDDB	TRAK	21
MDDB	DDI	1
MDDB	MEDDRA	139
MDDB	NMR	7
MDDB	SuicidO	7
MDDB	TOP-MENELAS	5
MDDB	TGMA	3
MDDB	IXNO	1
MDDB	NDDF	7366
MDDB	MEO	2
MDDB	ICD9CM	135
MDDB	PR	1
MDDB	BIOMODELS	9
MDDB	BDO	3
MDDB	OBIWS	3
MDDB	MAT	1
MDDB	PMR	3
MDDB	CHEBI	7
[truncated: 53,806 more rows]

## Sheet: Jul14
Source	Target	Weight
EDAM	GEOSPECIES	4
EDAM	TEO	12
EDAM	TMO	19
EDAM	IDO	3
EDAM	FB-CV	5
EDAM	NIFDYS	13
EDAM	SIO	45
EDAM	BIRNLEX	14
EDAM	OPL	2
EDAM	BP-METADATA	3
EDAM	EDDA	3
EDAM	GFO-BIO	7
EDAM	ONTODM-KDD	2
EDAM	OGMS	2
EDAM	BRO	19
EDAM	COGAT	2
EDAM	HL7	21
EDAM	COGPO	20
EDAM	CANONT	1
EDAM	CCONT	23
EDAM	ONTOKBCF	5
EDAM	EFO	30
EDAM	GENE-CDS	1
EDAM	ICF	1
EDAM	LHN	2
EDAM	PEO	2
EDAM	VARIO	2
EDAM	OCRE	7
EDAM	NTDO	6
EDAM	GLYCO	5
EDAM	RCTONT	1
EDAM	PAE	1
EDAM	CANCO	5
EDAM	OMRSE	2
EDAM	TRAK	7
EDAM	DDI	11
EDAM	MEDDRA	13
EDAM	NMR	7
EDAM	SuicidO	2
EDAM	TOP-MENELAS	2
EDAM	CDAO	3
EDAM	IXNO	2
EDAM	NDDF	8
EDAM	ICD9CM	6
EDAM	PR	9
EDAM	BIOMODELS	16
EDAM	BDO	9
EDAM	OBIWS	14
EDAM	CHEBI	1
EDAM	QUDT	3
EDAM	ONTODM-CORE	16
EDAM	BCO	2
EDAM	MMO	1
EDAM	ERO	47
EDAM	CNO	5
EDAM	CHEMINF	14
EDAM	GFO	1
EDAM	RS	1
EDAM	CAO	1
EDAM	CHD	338
EDAM	MIXSCV	2
EDAM	OAE	3
EDAM	ICPC2P	8
EDAM	RSA	2
EDAM	PHARE	4
EDAM	XEO	2
EDAM	RH-MESH	104
EDAM	GRO-CPGA	1
EDAM	HUGO	1
EDAM	WHO-ART	5
EDAM	BHO	3
EDAM	BP	5
EDAM	MCCV	1
EDAM	NCIT	185
EDAM	AI-RHEUM	3
EDAM	MDDB	5
EDAM	COSTART	3
EDAM	SPO	1
EDAM	MO	7
EDAM	NONRCTO	1
EDAM	OntoVIP	15
EDAM	ADO	11
EDAM	REXO	19
EDAM	IDODEN	7
EDAM	LOINC	41
EDAM	IMGT-ONTOLOGY	6
EDAM	OMIT	3
EDAM	MESH	92
EDAM	VO	8
EDAM	CLO	201
EDAM	MCCL	2
EDAM	HCPCS	5
EDAM	ICD10CM	5
EDAM	ICD10PCS	5
EDAM	ICD10	5
EDAM	ENVO	1
EDAM	RXNORM	3
EDAM	CRISP	66
EDAM	GRO	19
EDAM	CL	4
EDAM	HINO	14
EDAM	TAXRANK	1
EDAM	WSIO	4
EDAM	HRDO	9
EDAM	PATO	7
EDAM	NCBITAXON	13
EDAM	PPIO	8
EDAM	NIFSUBCELL	13
EDAM	SNOMEDCT	38
EDAM	ONTODT	2
EDAM	NIFSTD	104
EDAM	NEUMORE	1
EDAM	SWO	2838
EDAM	MIRNAO	11
EDAM	FB-SP	5
EDAM	IDQA	1
EDAM	GALEN	12
EDAM	BRIDG	3
EDAM	VIVO	6
EDAM	AERO	10
EDAM	SBO	9
EDAM	CCO	110
EDAM	GAZ	2
EDAM	OGI	6
EDAM	ONTOPNEUMO	2
EDAM	RCD	25
EDAM	UO	2
EDAM	BCGO	1
EDAM	NEOMARK3	2
EDAM	IDOBRU	6
EDAM	MCBCC	2
EDAM	ONL-MR-DA	14
EDAM	DERMLEX	1
EDAM	InterNano	1
EDAM	STY	5
EDAM	BT	5
EDAM	ONTOMA	4
EDAM	DIKB	4
EDAM	FYPO	13
EDAM	SHR	2
EDAM	ONSTR	6
EDAM	MF	1
EDAM	VTO	2
EDAM	PMA	12
EDAM	SBOL	3
EDAM	SAO	7
EDAM	NEMO	18
EDAM	NEOMARK4	3
EDAM	NIGO	4
EDAM	OBOE-SBC	7
EDAM	BSAO	1
EDAM	OMIM	24
EDAM	VANDF	8
EDAM	INO	16
EDAM	CSSO	2
EDAM	EP	30
EDAM	SSO	1
EDAM	MFOEM	1
EDAM	ACGT-MO	9
EDAM	TOK	16
EDAM	MIXS	1
EDAM	CHMO	8
EDAM	ECO	1
EDAM	PDO	2
EDAM	CPT	3
EDAM	ONL-DP	14
EDAM	SYN	48
EDAM	SEP	7
EDAM	RETO	16
EDAM	IAO	10
EDAM	ADW	3
EDAM	KISAO	1
EDAM	NPO	8
EDAM	PVONTO	1
EDAM	DIAGONT	1
EDAM	SWEET	33
EDAM	SNPO	23
EDAM	PORO	1
EDAM	FMA	4
EDAM	CBO	1
EDAM	CPTH	3
EDAM	CARELEX	2
EDAM	HPIO	2
EDAM	BAO	30
EDAM	CPRO	4
EDAM	ICPS	1
EDAM	suicideo	3
EDAM	NIFCELL	13
EDAM	CHEMBIO	5
EDAM	TAO	2
EDAM	OBI_BCGO	12
EDAM	PROPREO	5
EDAM	PCO	1
EDAM	SOPHARM	41
EDAM	MEDLINEPLUS	11
EDAM	NDFRT	12
EDAM	OOEVV	1
EDAM	PHYLONT	14
EDAM	GO-EXT	11
EDAM	QIBO	10
EDAM	SO	16
EDAM	OBI	24
EDAM	PDQ	23
EDAM	IFAR	1
EDAM	GO	11
EDAM	MHC	1
EDAM	ONL-MSA	11
EDAM	BOF	3
EDAM	SDO	4
EDAM	NATPRO	5
EDAM	ICPC	5
EDAM	NBO	1
EDAM	PEDTERM	3
EDAM	JERM	28
EDAM	PECO	4
EDAM	DERMO	1
EDAM	PHENX	1
EDAM	ECG	14
EDAM	PO	1
HUGO	GEOSPECIES	1
HUGO	TMO	1
HUGO	SIO	1
HUGO	FHHO	1
HUGO	ONTODM-KDD	1
HUGO	HL7	1
HUGO	COGPO	1
HUGO	EPILONT	1
HUGO	PEO	2
HUGO	OCRE	1
HUGO	NTDO	1
HUGO	GLYCO	1
HUGO	OPB	1
HUGO	MEDDRA	1
HUGO	PR	2
HUGO	BDO	21
HUGO	OBIWS	2
HUGO	ONTODM-CORE	1
HUGO	EDAM	1
HUGO	CHEMINF	1
HUGO	GFO	1
HUGO	CAO	1
HUGO	MIXSCV	1
HUGO	RSA	1
HUGO	PHARE	1
HUGO	BHO	1
HUGO	NCIT	8
HUGO	OntoVIP	2
HUGO	ADO	1
HUGO	REXO	1
HUGO	IDODEN	1
HUGO	LOINC	2
HUGO	IMGT-ONTOLOGY	2
HUGO	OMIT	1
HUGO	MESH	1
HUGO	SEDI	1
HUGO	ZFA	1
HUGO	HAO	1
HUGO	CRISP	3
HUGO	GRO	1
HUGO	HRDO	3
HUGO	SNOMEDCT	5
HUGO	ONTODT	1
HUGO	NIFSTD	5
HUGO	SWO	32880
HUGO	MIRNAO	1
HUGO	FB-SP	1
HUGO	ICD11-BODYSYSTEM	1
HUGO	CCO	1
HUGO	OGI	3
HUGO	ICECI	1
HUGO	PROVO	1
HUGO	RCD	3
HUGO	ONL-MR-DA	2
HUGO	BT	1
HUGO	DIKB	1
HUGO	FYPO	2
HUGO	SHR	1
HUGO	ONSTR	1
HUGO	SAO	1
HUGO	NEMO	1
HUGO	PTRANS	1
HUGO	NEOMARK4	1
HUGO	REPO	1
HUGO	OMIM	1
HUGO	ACGT-MO	1
HUGO	TOK	1
HUGO	ONL-DP	2
HUGO	SYN	2
HUGO	RETO	1
HUGO	NPO	1
HUGO	SWEET	1
HUGO	SNPO	3
HUGO	BAO	1
HUGO	CPRO	1
HUGO	ICPS	1
HUGO	suicideo	1
HUGO	OBI_BCGO	2
HUGO	SOPHARM	3
HUGO	SO	3
HUGO	OBI	2
HUGO	MHC	2
HUGO	ONL-MSA	2
HUGO	SDO	1
HUGO	JERM	1
HUGO	ECG	1
SWO	GEOSPECIES	7
SWO	TEO	24
SWO	TMO	30
SWO	IDO	9
SWO	FB-CV	3
SWO	NIFDYS	15
SWO	SIO	47
SWO	RPO	2
SWO	BIRNLEX	23
SWO	OPL	8
SWO	BP-METADATA	3
SWO	EDDA	4
SWO	GFO-BIO	8
SWO	ONTODM-KDD	20
SWO	OGMS	8
SWO	BRO	25
SWO	MEDO	1
SWO	COGAT	4
SWO	HL7	38
SWO	COGPO	30
SWO	AAO	2
SWO	CANONT	1
SWO	CCONT	32
SWO	ONTOKBCF	3
SWO	EFO	43
SWO	GENE-CDS	1
SWO	ICF	1
SWO	LHN	3
SWO	PEO	2
SWO	VARIO	2
SWO	OCRE	5
SWO	NTDO	8
SWO	GLYCO	4
SWO	RCTONT	4
SWO	OPB	1
SWO	PAE	3
SWO	CANCO	8
SWO	OMRSE	9
SWO	TRAK	10
SWO	DDI	21
SWO	MEDDRA	13
SWO	REX	1
SWO	NMR	10
SWO	SuicidO	4
SWO	TOP-MENELAS	1
SWO	CDAO	4
SWO	IXNO	1
SWO	NDDF	7
SWO	ICD9CM	4
SWO	PR	31
SWO	BIOMODELS	18
SWO	BDO	12
SWO	OBIWS	26
SWO	PMR	1
SWO	CHEBI	3
SWO	FAO	1
SWO	QUDT	4
SWO	ONTODM-CORE	52
SWO	BCO	7
SWO	MMO	1
SWO	XAO	4
SWO	ERO	408
SWO	EDAM	2838
SWO	CNO	11
SWO	CHEMINF	23
SWO	GFO	4
SWO	RS	1
SWO	CAO	15
SWO	EHDA	4
SWO	MIXSCV	2
SWO	OAE	14
SWO	ICPC2P	6
SWO	RSA	1
SWO	PHARE	3
SWO	XEO	2
SWO	RH-MESH	193
SWO	TRON	2
SWO	GRO-CPGA	3
SWO	HUGO	32880
SWO	WHO-ART	5
SWO	BHO	5
SWO	MP	1
SWO	BP	5
SWO	MCCV	1
SWO	NCIT	240
SWO	AI-RHEUM	3
SWO	MDDB	3
SWO	COSTART	5
SWO	SPO	1
SWO	MO	8
SWO	NONRCTO	5
SWO	OntoVIP	22
SWO	ADO	10
SWO	REXO	96
SWO	IDODEN	20
SWO	LOINC	72
SWO	IMGT-ONTOLOGY	4
SWO	OMIT	6
SWO	MESH	150
SWO	RNAO	4
SWO	VO	16
SWO	CLO	205
SWO	MCCL	4
SWO	HCPCS	3
SWO	ICD10CM	3
SWO	HAO	3
SWO	ICD10PCS	3
SWO	OVAE	3
SWO	ICD10	3
SWO	ENVO	2
SWO	RXNORM	5
SWO	CRISP	67
SWO	BTO	1
SWO	GRO	16
SWO	CL	4
SWO	HINO	39
SWO	VHOG	2
SWO	CABRO	1
SWO	WSIO	6
SWO	HRDO	19
SWO	PATO	6
SWO	NCBITAXON	22
SWO	PPIO	6
SWO	NIFSUBCELL	16
SWO	SNOMEDCT	80
SWO	ONTODT	3
SWO	NIFSTD	487
SWO	NEUMORE	2
SWO	MIRNAO	11
SWO	FB-SP	4
SWO	IDQA	1
SWO	GALEN	16
SWO	BRIDG	3
SWO	VIVO	9
SWO	AERO	21
SWO	SBO	9
SWO	EHDAA	1
SWO	CCO	238
SWO	GAZ	15
SWO	OGI	10
SWO	ONTOPNEUMO	3
SWO	PROVO	2
SWO	RCD	41
SWO	UO	5
SWO	BCGO	1
SWO	NEOMARK3	2
SWO	IDOBRU	14
SWO	MCBCC	2
SWO	ROLEO	2
SWO	ONL-MR-DA	21
SWO	DERMLEX	1
SWO	InterNano	1
SWO	STY	3
SWO	BT	8
SWO	ONTOMA	2
SWO	DIKB	4
SWO	FYPO	17
SWO	SHR	2
SWO	ONSTR	14
SWO	MF	6
SWO	VTO	5
SWO	WB-BT	7
SWO	PMA	11
SWO	SBOL	2
SWO	SAO	7
SWO	NEMO	26
SWO	UNITSONT	1
SWO	NEOMARK4	9
SWO	NIGO	4
SWO	OBOE-SBC	13
SWO	REPO	1
SWO	BSAO	1
SWO	VSO	6
SWO	OMIM	149
SWO	VANDF	8
SWO	INO	24
SWO	CSSO	2
SWO	EP	25
SWO	SSO	1
SWO	UBERON	7
SWO	MFOEM	6
SWO	ACGT-MO	12
SWO	TOK	17
SWO	MIXS	1
SWO	CHMO	20
SWO	ECO	1
SWO	PDO	2
SWO	CPT	3
SWO	ONL-DP	21
SWO	SYN	51
SWO	SEP	11
SWO	RETO	90
SWO	IAO	21
SWO	ADW	3
SWO	OPE	1
SWO	KISAO	1
SWO	NPO	13
SWO	PVONTO	2
SWO	DIAGONT	3
SWO	SWEET	73
SWO	SNPO	21
SWO	PORO	1
SWO	FMA	5
SWO	CBO	1
SWO	TEDDY	1
SWO	CPTH	3
SWO	CARELEX	2
SWO	HPIO	6
SWO	BAO	31
SWO	CPRO	8
SWO	ICPS	3
SWO	suicideo	7
SWO	NIFCELL	15
SWO	CHEMBIO	5
SWO	TAO	11
SWO	VSAO	2
SWO	OBI_BCGO	28
SWO	DCO	1
SWO	PROPREO	4
SWO	PCO	6
SWO	SOPHARM	47
SWO	MEDLINEPLUS	10
SWO	NDFRT	12
SWO	OOEVV	4
SWO	PHYLONT	11
SWO	GO-EXT	8
SWO	QIBO	9
SWO	SO	16
SWO	OBI	52
SWO	PDQ	28
SWO	FB-BT	4
SWO	IFAR	2
SWO	GO	9
SWO	BFO	4
SWO	MHC	1
SWO	ONL-MSA	12
SWO	BOF	4
SWO	SDO	11
SWO	NATPRO	4
SWO	ICPC	3
SWO	NBO	60
SWO	PEDTERM	2
SWO	JERM	28
SWO	PECO	2
SWO	DERMO	1
SWO	PHENX	1
SWO	ECG	22
SWO	PO	3
EDDA	TMO	1
EDDA	FB-CV	8
EDDA	SIO	7
EDDA	BIRNLEX	2
EDDA	BP-METADATA	2
EDDA	BRO	3
EDDA	HL7	4
EDDA	CCONT	3
EDDA	EFO	3
EDDA	OCRE	2
EDDA	CANCO	1
EDDA	BIOMODELS	1
EDDA	ERO	8
EDDA	EDAM	3
EDDA	CNO	1
EDDA	CHD	1
EDDA	RH-MESH	122
EDDA	NCIT	44
EDDA	AI-RHEUM	1
EDDA	MO	1
EDDA	OntoVIP	4
EDDA	ADO	18
EDDA	LOINC	5
EDDA	MESH	65
EDDA	CRISP	13
EDDA	SNOMEDCT	2
EDDA	NIFSTD	18
EDDA	SWO	4
EDDA	VIVO	8
EDDA	RCD	1
EDDA	NEOMARK3	1
EDDA	ROLEO	1
EDDA	ONL-MR-DA	3
EDDA	PMA	6
EDDA	SAO	1
EDDA	NEMO	3
EDDA	ACGT-MO	3
EDDA	ONL-DP	3
EDDA	SYN	25
EDDA	DIAGONT	2
EDDA	SWEET	5
EDDA	SNPO	1
EDDA	CTONT	1
EDDA	CPRO	1
EDDA	suicideo	8
EDDA	SOPHARM	4
EDDA	PHYLONT	1
EDDA	QIBO	1
EDDA	SO	1
EDDA	OBI	2
EDDA	ONL-MSA	2
EDDA	SDO	1
EDDA	PEDTERM	1
EDDA	JERM	2
EDDA	ECG	2
NDDF	GEOSPECIES	2
NDDF	TEO	3
NDDF	TMO	6
NDDF	IDO	4
NDDF	FB-CV	10
NDDF	NIFDYS	8
NDDF	SIO	15
NDDF	PSIMOD	5
NDDF	BIRNLEX	12
NDDF	OPL	6
NDDF	GFO-BIO	13
NDDF	FHHO	1
NDDF	OGMS	1
NDDF	BRO	3
NDDF	COGAT	1
NDDF	HL7	86
NDDF	COGPO	2
NDDF	AAO	11
NDDF	CANONT	3
NDDF	CCONT	312
NDDF	ONTOKBCF	46
NDDF	EFO	223
NDDF	GENE-CDS	5
NDDF	ICF	1
NDDF	LHN	5
NDDF	VARIO	1
NDDF	OCRE	5
NDDF	NTDO	29
NDDF	GLYCO	1
NDDF	OPB	1
NDDF	SPD	2
NDDF	CANCO	3
NDDF	OMRSE	3
NDDF	TRAK	22
NDDF	DDI	1
NDDF	MEDDRA	190
NDDF	NMR	8
NDDF	SuicidO	7
NDDF	TOP-MENELAS	6
NDDF	TGMA	4
NDDF	IXNO	1
NDDF	MEO	9
NDDF	ICD9CM	135
NDDF	PR	13
NDDF	BIOMODELS	610
NDDF	BDO	6
NDDF	OBIWS	10
NDDF	MAT	1
NDDF	PMR	4
NDDF	CHEBI	882
NDDF	QUDT	1
NDDF	ONTODM-CORE	2
NDDF	BCO	1
NDDF	TADS	3
NDDF	PATHLEX	1
NDDF	XAO	11
NDDF	ERO	48
NDDF	EDAM	8
NDDF	CNO	1
NDDF	CHEMINF	2
NDDF	GFO	2
NDDF	FBbi	3
NDDF	CAO	2
NDDF	EHDA	6
NDDF	MIXSCV	5
NDDF	OAE	6
NDDF	ICPC2P	140
NDDF	PHARE	15
NDDF	XEO	14
NDDF	RH-MESH	4901
NDDF	TRON	5
NDDF	AMINO-ACID	13
NDDF	SPTO	4
NDDF	WHO-ART	135
NDDF	BHO	10
NDDF	BP	1
NDDF	NCIT	3783
NDDF	AI-RHEUM	135
NDDF	MDDB	7366
NDDF	COSTART	139
NDDF	SPO	8
NDDF	MO	4
NDDF	OntoVIP	26
NDDF	ADO	132
NDDF	REXO	14
NDDF	IDODEN	27
NDDF	LOINC	1765
NDDF	IMGT-ONTOLOGY	2
NDDF	OMIT	13
NDDF	MESH	3692
NDDF	RNAO	1
NDDF	VO	19
NDDF	CLO	123
NDDF	MCCL	16
NDDF	ZFA	4
NDDF	HCPCS	158
NDDF	ICD10CM	134
NDDF	HAO	7
NDDF	ICD10PCS	134
NDDF	OVAE	1
NDDF	ICD10	136
NDDF	ENVO	6
NDDF	RXNORM	28897
NDDF	CRISP	858
NDDF	BTO	33
NDDF	GRO	21
NDDF	IDOMAL	5
NDDF	CL	5
NDDF	HINO	140
NDDF	VHOG	8
NDDF	CABRO	1
NDDF	HRDO	20
NDDF	PATO	3
NDDF	NCBITAXON	468
NDDF	PPIO	4
NDDF	NIFSUBCELL	9
NDDF	SNOMEDCT	8936
NDDF	NIFSTD	116
NDDF	NEUMORE	1
NDDF	SWO	7
NDDF	MIRNAO	4
NDDF	FB-SP	15
NDDF	GALEN	1379
NDDF	BRIDG	7
NDDF	ICD11-BODYSYSTEM	1
NDDF	VIVO	3
NDDF	AERO	2
NDDF	SBO	2
NDDF	EHDAA	3
NDDF	CCO	53
NDDF	GAZ	18
NDDF	VT	1
NDDF	ZEA	1
NDDF	OGI	3
NDDF	ONTOPNEUMO	15
NDDF	PROVO	3
NDDF	RCD	4553
NDDF	UO	1
NDDF	BCGO	5
NDDF	IDOBRU	8
NDDF	MCBCC	11
NDDF	ROLEO	1
NDDF	ONL-MR-DA	6
NDDF	DERMLEX	3
NDDF	STY	134
NDDF	BT	29
NDDF	ONTOMA	3
NDDF	DIKB	2
NDDF	FYPO	31
NDDF	ONSTR	36
NDDF	MF	5
NDDF	XCO	26
NDDF	VTO	2
NDDF	WB-BT	5
NDDF	PMA	15
NDDF	SAO	6
NDDF	NEMO	4
NDDF	CARO	3
NDDF	NEOMARK4	2
NDDF	NIGO	6
NDDF	OBOE-SBC	22
NDDF	BSAO	4
NDDF	VSO	4
NDDF	OMIM	146
NDDF	VANDF	11669
NDDF	INO	2
NDDF	EP	59
NDDF	UBERON	11
NDDF	MFOEM	5
NDDF	ACGT-MO	29
NDDF	TOK	3
NDDF	MIXS	1
NDDF	MFO	1
NDDF	ELIG	1
NDDF	CHMO	1
NDDF	PDO	1
NDDF	CPT	180
NDDF	ONL-DP	4
NDDF	SYN	67
NDDF	SEP	5
NDDF	EHDAA2	6
NDDF	AEO	5
NDDF	RETO	14
NDDF	IAO	1
NDDF	ADW	5
NDDF	OPE	2
NDDF	NPO	81
NDDF	PVONTO	1
NDDF	MIRO	3
NDDF	BNO	3
NDDF	SWEET	35
NDDF	SNPO	18
NDDF	ATMO	4
NDDF	PORO	5
NDDF	FMA	51
NDDF	CBO	1
NDDF	CPTH	134
NDDF	HPIO	8
NDDF	BAO	39
NDDF	MA	7
NDDF	CPRO	5
NDDF	ICPS	3
NDDF	suicideo	7
NDDF	NIFCELL	8
NDDF	CHEMBIO	2
NDDF	TAO	10
NDDF	VSAO	5
NDDF	OBI_BCGO	12
NDDF	DCO	2
NDDF	PROPREO	6
NDDF	PCO	3
NDDF	SOPHARM	451
NDDF	MEDLINEPLUS	157
NDDF	NDFRT	12328
NDDF	PHYLONT	1
NDDF	GO-EXT	7
NDDF	QIBO	19
NDDF	SO	16
NDDF	OBI	50
NDDF	GCO	1
NDDF	PDQ	348
NDDF	FB-BT	7
NDDF	IFAR	6
NDDF	GO	7
NDDF	BFO	1
NDDF	MHC	133
NDDF	ONL-MSA	6
NDDF	BOF	7
NDDF	SDO	65
NDDF	NATPRO	13
NDDF	ICPC	134
NDDF	NBO	1
NDDF	PEDTERM	20
NDDF	DDANAT	1
NDDF	JERM	3
NDDF	PECO	15
NDDF	DERMO	1
NDDF	ECG	2
RNRMU	MESH	1
RH-MESH	GEOSPECIES	5
RH-MESH	TEO	22
RH-MESH	TMO	35
RH-MESH	IDO	28
RH-MESH	FB-CV	80
RH-MESH	NIFDYS	196
RH-MESH	SIO	186
RH-MESH	PSIMOD	138
RH-MESH	RPO	1145
RH-MESH	BIRNLEX	450
RH-MESH	PW	7
RH-MESH	OPL	29
RH-MESH	BP-METADATA	2
RH-MESH	EDDA	122
RH-MESH	GFO-BIO	13
RH-MESH	FHHO	20
RH-MESH	ONTODM-KDD	2
RH-MESH	OGMS	11
RH-MESH	BRO	26
RH-MESH	PTO	1
RH-MESH	COGAT	69
RH-MESH	HL7	339
RH-MESH	COGPO	13
RH-MESH	AAO	151
RH-MESH	CANONT	6
RH-MESH	CCONT	2317
RH-MESH	ONTOKBCF	70
RH-MESH	EPILONT	9
RH-MESH	EFO	5221
RH-MESH	GENE-CDS	444
RH-MESH	ICF	199
RH-MESH	LHN	7
RH-MESH	PEO	8
RH-MESH	VARIO	73
RH-MESH	OCRE	11
RH-MESH	TM-SIGNS-AND-SYMPTS	128
RH-MESH	NTDO	22
RH-MESH	GLYCO	5
RH-MESH	RCTONT	1
RH-MESH	OPB	6
RH-MESH	PAE	33
RH-MESH	SPD	32
RH-MESH	CANCO	8
RH-MESH	OMRSE	6
RH-MESH	TRAK	342
RH-MESH	DDI	3
RH-MESH	MEDDRA	3080
RH-MESH	REX	42
RH-MESH	NMR	11
RH-MESH	SuicidO	46
RH-MESH	TOP-MENELAS	15
RH-MESH	CDAO	3
RH-MESH	TGMA	40
RH-MESH	IXNO	21
RH-MESH	NDDF	4901
RH-MESH	MEO	41
RH-MESH	ICD9CM	830
RH-MESH	PR	3538
RH-MESH	BIOMODELS	2874
RH-MESH	BDO	948
RH-MESH	OBIWS	13
RH-MESH	MAT	20
RH-MESH	PMR	10
RH-MESH	SSE	175
RH-MESH	CHEBI	6912
RH-MESH	FAO	1
RH-MESH	ONTODM-CORE	9
RH-MESH	BCO	2
RH-MESH	MMO	23
RH-MESH	TADS	2
RH-MESH	PATHLEX	54
RH-MESH	XAO	308
RH-MESH	ERO	632
RH-MESH	WB-PHENOTYPE	10
RH-MESH	EDAM	104
RH-MESH	CNO	3
RH-MESH	CHEMINF	8
RH-MESH	GFO	3
RH-MESH	FBbi	43
RH-MESH	RS	82
RH-MESH	CAO	6
RH-MESH	EHDA	1466
RH-MESH	CHD	6
RH-MESH	MIXSCV	219
RH-MESH	OAE	123
RH-MESH	ICPC2P	2271
RH-MESH	RSA	3
RH-MESH	PHARE	37
RH-MESH	XEO	104
RH-MESH	TRON	55
RH-MESH	GRO-CPGA	33
RH-MESH	AMINO-ACID	18
RH-MESH	SPTO	41
RH-MESH	WHO-ART	1945
RH-MESH	BHO	92
RH-MESH	MP	695
RH-MESH	BP	4
RH-MESH	MCCV	5
RH-MESH	NCIT	18236
RH-MESH	AI-RHEUM	81
RH-MESH	MDDB	52
RH-MESH	COSTART	1527
RH-MESH	SPO	134
RH-MESH	MO	18
RH-MESH	NONRCTO	2
RH-MESH	OntoVIP	542
RH-MESH	ADO	325
RH-MESH	REXO	1863
RH-MESH	IDODEN	353
RH-MESH	LOINC	6218
RH-MESH	pseudo	2
RH-MESH	MPATH	70
RH-MESH	IMGT-ONTOLOGY	8
RH-MESH	OMIT	23
RH-MESH	MESH	251322
RH-MESH	RNAO	2
RH-MESH	VO	909
RH-MESH	CLO	8
RH-MESH	MCCL	194
RH-MESH	OGR	35
RH-MESH	ZFA	427
RH-MESH	HCPCS	83
RH-MESH	ICD10CM	1404
RH-MESH	FB-DV	4
RH-MESH	HAO	50
RH-MESH	ICD10PCS	13
RH-MESH	CMO	35
RH-MESH	OVAE	83
RH-MESH	ICD10	783
RH-MESH	ENVO	34
RH-MESH	RXNORM	6816
RH-MESH	CRISP	8447
RH-MESH	BTO	364
RH-MESH	GRO	78
RH-MESH	IDOMAL	27
RH-MESH	CL	73
RH-MESH	TTO	2
RH-MESH	HINO	893
RH-MESH	TAXRANK	3
RH-MESH	VHOG	447
RH-MESH	CABRO	3
RH-MESH	WSIO	4
RH-MESH	HRDO	2921
RH-MESH	PATO	60
RH-MESH	CTCAE	210
RH-MESH	APO	17
RH-MESH	NCBITAXON	3888
RH-MESH	PPIO	83
RH-MESH	NIFSUBCELL	81
RH-MESH	SNOMEDCT	31397
RH-MESH	ONTODT	1
RH-MESH	NIFSTD	6490
RH-MESH	SOY	3
RH-MESH	NEUMORE	1
RH-MESH	SWO	193
RH-MESH	MEGO	1
RH-MESH	MIRNAO	87
RH-MESH	FB-SP	362
RH-MESH	IDQA	5
RH-MESH	GALEN	3097
RH-MESH	BRIDG	4
RH-MESH	ICD11-BODYSYSTEM	11
RH-MESH	VIVO	41
RH-MESH	AERO	37
RH-MESH	SBO	88
RH-MESH	EHDAA	396
RH-MESH	CCO	3491
RH-MESH	GAZ	502
RH-MESH	VT	70
RH-MESH	ZEA	4
RH-MESH	OGI	14
RH-MESH	ONTOPNEUMO	127
RH-MESH	PROVO	4
RH-MESH	RCD	7540
RH-MESH	UO	24
RH-MESH	BCGO	4
RH-MESH	NEOMARK3	2
RH-MESH	IDOBRU	137
RH-MESH	MCBCC	85
RH-MESH	ROLEO	5
RH-MESH	ONL-MR-DA	12
RH-MESH	DERMLEX	689
RH-MESH	InterNano	26
RH-MESH	STY	33
RH-MESH	BT	16
RH-MESH	ONTOMA	4
RH-MESH	EMAP	78
RH-MESH	DIKB	7
RH-MESH	FYPO	487
RH-MESH	SHR	159
RH-MESH	ONSTR	116
RH-MESH	MF	39
RH-MESH	XCO	248
RH-MESH	VTO	569
RH-MESH	WB-BT	294
RH-MESH	PMA	445
RH-MESH	SAO	380
RH-MESH	NEMO	96
RH-MESH	CARO	1
RH-MESH	NEOMARK4	13
RH-MESH	NIGO	121
RH-MESH	OBOE-SBC	37
RH-MESH	REPO	7
RH-MESH	BSAO	8
RH-MESH	VSO	43
RH-MESH	OMIM	7104
RH-MESH	VANDF	5110
RH-MESH	INO	23
RH-MESH	CSSO	174
RH-MESH	EP	717
RH-MESH	SSO	120
RH-MESH	ATO	1
RH-MESH	UBERON	848
RH-MESH	MFOEM	64
RH-MESH	ACGT-MO	216
RH-MESH	TOK	15
RH-MESH	MIXS	1
RH-MESH	MFO	44
RH-MESH	ELIG	6
RH-MESH	CHMO	144
RH-MESH	PDO	153
RH-MESH	CPT	397
RH-MESH	ONL-DP	11
RH-MESH	SYN	3502
RH-MESH	SEP	26
RH-MESH	EHDAA2	154
RH-MESH	AEO	22
RH-MESH	RETO	1681
RH-MESH	IAO	6
RH-MESH	ADW	30
RH-MESH	OPE	79
RH-MESH	KISAO	5
RH-MESH	NPO	255
RH-MESH	PVONTO	1
RH-MESH	HP	1067
RH-MESH	ABA-AMB	27
RH-MESH	MIRO	77
RH-MESH	BNO	8
RH-MESH	GRO-CPD	10
RH-MESH	DIAGONT	3
RH-MESH	SWEET	888
RH-MESH	SNPO	193
RH-MESH	CTONT	2
RH-MESH	ATMO	52
RH-MESH	PORO	13
RH-MESH	FMA	631
RH-MESH	SYMP	590
RH-MESH	CBO	23
RH-MESH	TEDDY	5
RH-MESH	CPTH	20
RH-MESH	CARELEX	7
RH-MESH	HPIO	33
RH-MESH	BAO	239
RH-MESH	MA	346
RH-MESH	RNPRIO	10
RH-MESH	CPRO	2
RH-MESH	ICPS	13
RH-MESH	suicideo	143
RH-MESH	NIFCELL	57
RH-MESH	CHEMBIO	18
RH-MESH	TAO	503
RH-MESH	VSAO	42
RH-MESH	OBI_BCGO	234
RH-MESH	WB-LS	5
RH-MESH	DCO	3
RH-MESH	PROPREO	9
RH-MESH	PCO	16
RH-MESH	SOPHARM	8222
RH-MESH	MEDLINEPLUS	1770
RH-MESH	NDFRT	40641
RH-MESH	PHYLONT	10
RH-MESH	GO-EXT	478
RH-MESH	QIBO	109
RH-MESH	SO	270
RH-MESH	OBI	591
RH-MESH	GCO	1
RH-MESH	PDQ	2112
RH-MESH	FB-BT	105
RH-MESH	IFAR	511
RH-MESH	GO	530
RH-MESH	BFO	1
RH-MESH	MHC	403
RH-MESH	ONL-MSA	16
RH-MESH	BOF	11
RH-MESH	SDO	327
RH-MESH	NATPRO	1472
RH-MESH	ICPC	111
RH-MESH	NBO	57
RH-MESH	PEDTERM	350
RH-MESH	JERM	33
RH-MESH	PECO	113
RH-MESH	DERMO	621
RH-MESH	PHENX	35
RH-MESH	ECG	19
RH-MESH	PO	33
MDDB	GEOSPECIES	2
MDDB	TEO	2
MDDB	TMO	6
MDDB	IDO	4
MDDB	FB-CV	1
MDDB	NIFDYS	6
MDDB	SIO	11
MDDB	BIRNLEX	9
MDDB	OPL	6
MDDB	GFO-BIO	12
MDDB	FHHO	1
MDDB	OGMS	1
MDDB	BRO	3
MDDB	COGAT	1
MDDB	HL7	12
MDDB	COGPO	2
MDDB	AAO	4
MDDB	CANONT	3
MDDB	CCONT	15
MDDB	ONTOKBCF	35
MDDB	EFO	19
MDDB	GENE-CDS	1
MDDB	ICF	1
MDDB	LHN	3
MDDB	OCRE	5
MDDB	NTDO	29
MDDB	GLYCO	1
MDDB	OPB	1
MDDB	CANCO	3
MDDB	OMRSE	3
MDDB	TRAK	21
MDDB	DDI	1
MDDB	MEDDRA	139
MDDB	NMR	7
MDDB	SuicidO	7
MDDB	TOP-MENELAS	5
MDDB	TGMA	3
MDDB	IXNO	1
MDDB	NDDF	7366
MDDB	MEO	2
MDDB	ICD9CM	135
MDDB	PR	1
MDDB	BIOMODELS	9
MDDB	BDO	3
MDDB	OBIWS	3
MDDB	MAT	1
MDDB	PMR	3
MDDB	CHEBI	7
MDDB	FAO	1
MDDB	ONTODM-CORE	2
MDDB	BCO	1
MDDB	TADS	3
MDDB	XAO	5
MDDB	ERO	9
MDDB	EDAM	5
MDDB	CNO	1
MDDB	CHEMINF	1
MDDB	GFO	2
MDDB	CAO	2
MDDB	EHDA	1
MDDB	MIXSCV	2
MDDB	OAE	5
MDDB	ICPC2P	139
MDDB	PHARE	6
MDDB	RH-MESH	52
MDDB	TRON	4
MDDB	WHO-ART	134
MDDB	BHO	2
MDDB	BP	1
MDDB	NCIT	137
MDDB	AI-RHEUM	134
MDDB	COSTART	134
MDDB	SPO	5
MDDB	MO	2
MDDB	OntoVIP	9
MDDB	ADO	8
MDDB	REXO	6
MDDB	IDODEN	18
MDDB	LOINC	191
MDDB	IMGT-ONTOLOGY	2
MDDB	OMIT	12
MDDB	MESH	207
MDDB	RNAO	1
MDDB	VO	4
MDDB	CLO	123
MDDB	MCCL	4
MDDB	ZFA	2
MDDB	HCPCS	139
MDDB	ICD10CM	134
MDDB	HAO	3
MDDB	ICD10PCS	134
MDDB	OVAE	1
MDDB	ICD10	134
MDDB	RXNORM	12325
MDDB	CRISP	174
MDDB	BTO	18
MDDB	GRO	18
MDDB	CL	4
MDDB	HINO	4
MDDB	VHOG	2
MDDB	CABRO	1
MDDB	PATO	1
MDDB	NCBITAXON	3
MDDB	PPIO	1
MDDB	NIFSUBCELL	6
MDDB	SNOMEDCT	4907
MDDB	NIFSTD	30
MDDB	NEUMORE	1
MDDB	SWO	3
MDDB	MIRNAO	3
MDDB	FB-SP	1
MDDB	GALEN	52
MDDB	BRIDG	6
MDDB	ICD11-BODYSYSTEM	1
MDDB	VIVO	3
MDDB	AERO	2
MDDB	SBO	2
MDDB	EHDAA	1
MDDB	CCO	7
MDDB	GAZ	2
MDDB	VT	1
MDDB	ZEA	1
MDDB	OGI	3
MDDB	ONTOPNEUMO	4
MDDB	PROVO	3
MDDB	RCD	2185
MDDB	BCGO	5
MDDB	IDOBRU	5
MDDB	MCBCC	2
MDDB	ONL-MR-DA	6
MDDB	DERMLEX	2
MDDB	STY	133
MDDB	BT	29
MDDB	ONTOMA	3
MDDB	DIKB	2
MDDB	FYPO	8
MDDB	ONSTR	9
MDDB	MF	5
MDDB	XCO	8
MDDB	WB-BT	3
MDDB	PMA	3
MDDB	SAO	4
MDDB	NEMO	4
MDDB	CARO	3
MDDB	NEOMARK4	2
MDDB	NIGO	4
MDDB	OBOE-SBC	8
MDDB	BSAO	2
MDDB	VSO	4
MDDB	OMIM	134
MDDB	VANDF	6019
MDDB	INO	2
MDDB	EP	12
MDDB	UBERON	4
MDDB	MFOEM	5
MDDB	ACGT-MO	10
MDDB	TOK	3
MDDB	MIXS	1
MDDB	ELIG	1
MDDB	CHMO	1
MDDB	CPT	134
MDDB	ONL-DP	4
MDDB	SYN	32
MDDB	SEP	4
MDDB	EHDAA2	4
MDDB	AEO	4
MDDB	RETO	6
MDDB	IAO	1
MDDB	ADW	5
MDDB	NPO	8
MDDB	PVONTO	1
MDDB	BNO	1
MDDB	SWEET	19
MDDB	SNPO	2
MDDB	ATMO	2
MDDB	PORO	3
MDDB	FMA	7
MDDB	CBO	1
MDDB	CPTH	134
MDDB	HPIO	5
MDDB	BAO	18
MDDB	MA	2
MDDB	CPRO	5
MDDB	ICPS	1
MDDB	suicideo	7
MDDB	NIFCELL	6
MDDB	CHEMBIO	2
MDDB	TAO	5
MDDB	VSAO	5
MDDB	OBI_BCGO	9
MDDB	DCO	2
MDDB	PROPREO	5
MDDB	PCO	3
MDDB	SOPHARM	14
MDDB	MEDLINEPLUS	134
MDDB	NDFRT	6020
MDDB	GO-EXT	4
MDDB	QIBO	9
MDDB	OBI	7
MDDB	GCO	1
MDDB	PDQ	141
MDDB	FB-BT	4
MDDB	IFAR	1
MDDB	GO	4
MDDB	BFO	1
MDDB	MHC	3
MDDB	ONL-MSA	6
MDDB	BOF	4
MDDB	SDO	6
MDDB	NATPRO	11
MDDB	ICPC	134
MDDB	NBO	1
MDDB	PEDTERM	16
MDDB	DDANAT	1
MDDB	JERM	3
MDDB	PECO	3
MDDB	ECG	2
MESH	GEOSPECIES	8
MESH	TEO	20
MESH	TMO	31
MESH	IDO	34
MESH	FB-CV	81
MESH	NIFDYS	408
MESH	SIO	112
MESH	PSIMOD	103
MESH	RPO	521
MESH	BIRNLEX	604
MESH	PW	30
MESH	OPL	35
MESH	BP-METADATA	2
MESH	EDDA	65
MESH	GFO-BIO	27
MESH	FHHO	25
MESH	ONTODM-KDD	4
MESH	OGMS	14
MESH	BRO	36
MESH	PTO	2
MESH	COGAT	87
MESH	HL7	468
MESH	COGPO	15
MESH	AAO	184
MESH	CANONT	8
MESH	CCONT	3537
MESH	ONTOKBCF	159
MESH	EPILONT	17
MESH	EFO	4370
MESH	GENE-CDS	449
MESH	ICF	30
MESH	LHN	10
MESH	PEO	9
MESH	VARIO	30
MESH	OCRE	21
MESH	TM-SIGNS-AND-SYMPTS	46
MESH	NTDO	58
MESH	GLYCO	6
MESH	RCTONT	3
MESH	OPB	11
MESH	PAE	25
MESH	SPD	22
MESH	CANCO	12
MESH	OMRSE	15
MESH	TRAK	191
MESH	DDI	4
MESH	MEDDRA	12492
MESH	REX	38
MESH	NMR	20
MESH	SuicidO	35
MESH	TOP-MENELAS	18
MESH	CDAO	4
MESH	TGMA	29
MESH	IXNO	18
MESH	NDDF	3692
MESH	MEO	56
MESH	ICD9CM	2162
MESH	PR	2890
MESH	BIOMODELS	3814
MESH	BDO	1433
MESH	OBIWS	21
MESH	MAT	18
MESH	PMR	19
MESH	SSE	83
MESH	CHEBI	6686
MESH	FAO	3
MESH	QUDT	1
MESH	ONTODM-CORE	16
MESH	RNRMU	1
MESH	BCO	3
MESH	MMO	31
MESH	TADS	4
MESH	PATHLEX	59
MESH	XAO	160
MESH	ERO	611
MESH	WB-PHENOTYPE	5
MESH	EDAM	92
MESH	CNO	7
MESH	CHEMINF	11
MESH	GFO	5
MESH	FBbi	64
MESH	RS	87
MESH	CAO	8
MESH	EHDA	1871
MESH	CHD	9
MESH	MIXSCV	264
MESH	OAE	148
MESH	ICPC2P	2278
MESH	RSA	1
MESH	PHARE	75
MESH	XEO	38
MESH	RH-MESH	251322
MESH	TRON	32
MESH	GRO-CPGA	29
MESH	HUGO	1
MESH	AMINO-ACID	19
MESH	SPTO	17
MESH	WHO-ART	1169
MESH	BHO	118
MESH	MP	512
MESH	BP	7
MESH	MCCV	5
MESH	NCIT	17165
MESH	AI-RHEUM	282
MESH	MDDB	207
MESH	COSTART	1169
MESH	SPO	56
MESH	MO	85
MESH	NONRCTO	4
MESH	OntoVIP	335
MESH	ADO	390
MESH	REXO	1268
MESH	IDODEN	428
MESH	LOINC	9604
MESH	pseudo	2
MESH	MPATH	79
MESH	IMGT-ONTOLOGY	12
MESH	OMIT	49
MESH	RNAO	2
MESH	VO	493
MESH	CLO	133
MESH	MCCL	220
MESH	OGR	35
MESH	ZFA	131
MESH	HCPCS	181
MESH	ICD10CM	2576
MESH	FB-DV	1
MESH	HAO	60
MESH	ICD10PCS	148
MESH	CMO	22
MESH	OVAE	6
MESH	ICD10	1918
MESH	ENVO	35
MESH	RXNORM	7306
MESH	CRISP	7606
MESH	BTO	486
MESH	GRO	94
MESH	IDOMAL	31
MESH	CL	85
MESH	TTO	1
MESH	HINO	1245
MESH	TAXRANK	1
MESH	VHOG	229
MESH	CABRO	6
MESH	WSIO	1
MESH	HRDO	3505
MESH	PATO	75
MESH	CTCAE	247
MESH	APO	24
MESH	NCBITAXON	4195
MESH	PPIO	63
MESH	NIFSUBCELL	148
MESH	SNOMEDCT	25915
MESH	ONTODT	2
MESH	NIFSTD	8400
MESH	SOY	1
MESH	NEUMORE	2
MESH	SWO	150
MESH	MEGO	1
MESH	MIRNAO	129
MESH	FB-SP	416
MESH	IDQA	7
MESH	GALEN	4231
MESH	BRIDG	12
MESH	ICD11-BODYSYSTEM	12
MESH	VIVO	25
MESH	AERO	29
MESH	SBO	29
MESH	EHDAA	503
MESH	CCO	3343
MESH	GAZ	619
MESH	VT	10
MESH	ZEA	4
MESH	OGI	24
MESH	ONTOPNEUMO	185
MESH	PROVO	7
MESH	RCD	14738
MESH	UO	14
MESH	BCGO	10
MESH	NEOMARK3	3
MESH	IDOBRU	163
MESH	MCBCC	92
MESH	ROLEO	10
MESH	ONL-MR-DA	19
MESH	DERMLEX	1199
MESH	InterNano	37
MESH	STY	161
MESH	BT	44
MESH	ONTOMA	9
MESH	EMAP	78
MESH	DIKB	10
MESH	FYPO	347
MESH	SHR	78
MESH	ONSTR	165
MESH	MF	61
MESH	XCO	119
MESH	VTO	520
MESH	WB-BT	266
MESH	PMA	551
MESH	SBOL	1
MESH	SAO	168
MESH	NEMO	76
MESH	PTRANS	1
MESH	CARO	4
MESH	NEOMARK4	19
MESH	NIGO	161
MESH	OBOE-SBC	45
MESH	REPO	8
MESH	BSAO	11
MESH	VSO	22
MESH	OMIM	11514
MESH	VANDF	3689
MESH	INO	31
MESH	CSSO	107
MESH	EP	959
MESH	SSO	48
MESH	ATO	1
MESH	UBERON	370
MESH	MFOEM	87
MESH	ACGT-MO	259
MESH	TOK	13
MESH	MIXS	3
MESH	MFO	38
MESH	ELIG	9
MESH	CHMO	109
MESH	PDO	171
MESH	CPT	399
MESH	ONL-DP	16
MESH	SYN	1824
MESH	SEP	22
MESH	EHDAA2	185
MESH	AEO	22
MESH	RETO	1188
MESH	IAO	5
MESH	ADW	44
MESH	OPE	102
MESH	KISAO	3
MESH	NPO	310
MESH	PVONTO	2
MESH	HP	1089
MESH	ABA-AMB	48
MESH	MIRO	89
MESH	BNO	10
MESH	GRO-CPD	8
MESH	DIAGONT	6
MESH	SWEET	509
MESH	SNPO	121
MESH	CTONT	2
MESH	ATMO	55
MESH	PORO	22
MESH	FMA	836
MESH	SYMP	235
MESH	CBO	27
MESH	TEDDY	2
MESH	CPTH	189
MESH	CARELEX	12
MESH	HPIO	40
MESH	BAO	321
MESH	MA	424
MESH	RNPRIO	7
MESH	CPRO	9
MESH	ICPS	19
MESH	suicideo	69
MESH	NIFCELL	107
MESH	CHEMBIO	25
MESH	TAO	226
MESH	VSAO	24
MESH	OBI_BCGO	355
MESH	WB-LS	2
MESH	DCO	7
MESH	PROPREO	23
MESH	PCO	22
MESH	SOPHARM	5625
MESH	MEDLINEPLUS	1141
MESH	HOM	2
MESH	NDFRT	15441
MESH	PHYLONT	17
MESH	GO-EXT	409
MESH	QIBO	167
MESH	SO	153
MESH	OBI	689
MESH	GCO	2
MESH	PDQ	3089
MESH	FB-BT	108
MESH	IFAR	696
MESH	GO	438
MESH	BFO	2
MESH	MHC	228
MESH	ONL-MSA	26
MESH	BOF	15
MESH	SDO	178
MESH	NATPRO	2408
MESH	ICPC	294
MESH	NBO	102
MESH	PEDTERM	561
MESH	DDANAT	1
MESH	JERM	51
MESH	PECO	107
MESH	DERMO	766
MESH	PHENX	47
MESH	ECG	25
MESH	PO	25
OGR	HL7	1
OGR	MIXSCV	2
OGR	RH-MESH	35
OGR	NCIT	11
OGR	MESH	35
OGR	CRISP	13
OGR	SNOMEDCT	8
OGR	GAZ	14
OGR	RCD	8
OGR	IDOBRU	1
OGR	PMA	2
RXNORM	GEOSPECIES	1
RXNORM	TEO	6
RXNORM	TMO	4
RXNORM	IDO	5
RXNORM	FB-CV	8
RXNORM	NIFDYS	6
RXNORM	SIO	13
RXNORM	PSIMOD	16
RXNORM	RPO	2
RXNORM	BIRNLEX	12
RXNORM	OPL	5
RXNORM	GFO-BIO	10
RXNORM	FHHO	1
RXNORM	OGMS	1
RXNORM	BRO	3
RXNORM	COGAT	1
RXNORM	HL7	142
RXNORM	COGPO	2
RXNORM	AAO	5
RXNORM	CANONT	3
RXNORM	CCONT	361
RXNORM	ONTOKBCF	39
RXNORM	EFO	494
RXNORM	GENE-CDS	6
RXNORM	ICF	2
RXNORM	LHN	5
RXNORM	VARIO	1
RXNORM	OCRE	5
RXNORM	TM-SIGNS-AND-SYMPTS	1
RXNORM	NTDO	23
RXNORM	RCTONT	1
RXNORM	OPB	1
RXNORM	PAE	1
RXNORM	SPD	1
RXNORM	CANCO	2
RXNORM	OMRSE	2
RXNORM	TRAK	20
RXNORM	DDI	1
RXNORM	MEDDRA	228
RXNORM	NMR	7
RXNORM	SuicidO	7
RXNORM	TOP-MENELAS	6
RXNORM	CDAO	1
RXNORM	TGMA	6
RXNORM	IXNO	1
RXNORM	NDDF	28897
RXNORM	MEO	7
RXNORM	ICD9CM	138
RXNORM	PR	99
RXNORM	BIOMODELS	718
RXNORM	BDO	8
RXNORM	OBIWS	3
RXNORM	PMR	3
RXNORM	CHEBI	1466
RXNORM	ONTODM-CORE	1
RXNORM	BCO	1
RXNORM	MMO	1
RXNORM	TADS	3
RXNORM	PATHLEX	1
RXNORM	XAO	6
RXNORM	ERO	23
RXNORM	EDAM	3
RXNORM	CNO	3
RXNORM	CHEMINF	1
RXNORM	GFO	2
RXNORM	FBbi	6
RXNORM	CAO	3
RXNORM	EHDA	29
RXNORM	MIXSCV	3
RXNORM	OAE	5
RXNORM	ICPC2P	157
RXNORM	PHARE	22
RXNORM	XEO	137
RXNORM	RH-MESH	6816
RXNORM	TRON	4
RXNORM	GRO-CPGA	1
RXNORM	AMINO-ACID	16
RXNORM	SPTO	6
RXNORM	WHO-ART	136
RXNORM	BHO	11
RXNORM	BP	1
RXNORM	MCCV	1
RXNORM	NCIT	5810
RXNORM	AI-RHEUM	135
RXNORM	MDDB	12325
RXNORM	COSTART	137
RXNORM	SPO	3
RXNORM	MO	3
RXNORM	NONRCTO	1
RXNORM	OntoVIP	296
RXNORM	ADO	137
RXNORM	REXO	63
RXNORM	IDODEN	36
RXNORM	LOINC	3058
RXNORM	IMGT-ONTOLOGY	2
RXNORM	OMIT	12
RXNORM	MESH	7306
RXNORM	RNAO	1
RXNORM	VO	98
RXNORM	CLO	123
RXNORM	MCCL	13
RXNORM	ZFA	3
RXNORM	HCPCS	243
RXNORM	ICD10CM	135
RXNORM	HAO	7
RXNORM	ICD10PCS	134
RXNORM	OVAE	1
RXNORM	ICD10	175
RXNORM	ENVO	6
RXNORM	CRISP	1246
RXNORM	BTO	21
RXNORM	GRO	16
RXNORM	IDOMAL	7
RXNORM	CL	4
RXNORM	HINO	188
RXNORM	VHOG	4
RXNORM	CABRO	1
RXNORM	HRDO	21
RXNORM	PATO	2
RXNORM	CTCAE	1
RXNORM	NCBITAXON	743
RXNORM	PPIO	9
RXNORM	NIFSUBCELL	7
RXNORM	SNOMEDCT	15671
RXNORM	NIFSTD	353
RXNORM	SWO	5
RXNORM	MEGO	1
RXNORM	MIRNAO	10
RXNORM	FB-SP	18
RXNORM	GALEN	1571
RXNORM	BRIDG	5
RXNORM	ICD11-BODYSYSTEM	1
RXNORM	VIVO	3
RXNORM	AERO	2
RXNORM	SBO	1
RXNORM	EHDAA	7
RXNORM	CCO	125
RXNORM	GAZ	38
RXNORM	VT	1
RXNORM	OGI	3
RXNORM	ONTOPNEUMO	38
RXNORM	PROVO	2
RXNORM	RCD	15242
RXNORM	UO	2
RXNORM	BCGO	3
RXNORM	IDOBRU	11
RXNORM	MCBCC	8
RXNORM	ROLEO	1
RXNORM	ONL-MR-DA	7
RXNORM	DERMLEX	3
RXNORM	STY	133
RXNORM	BT	23
RXNORM	ONTOMA	3
RXNORM	DIKB	1
RXNORM	FYPO	81
RXNORM	SHR	1
RXNORM	ONSTR	53
RXNORM	MF	5
RXNORM	XCO	37
RXNORM	VTO	10
RXNORM	WB-BT	8
RXNORM	PMA	15
RXNORM	SAO	15
RXNORM	NEMO	5
RXNORM	CARO	3
RXNORM	UNITSONT	1
RXNORM	NEOMARK4	2
RXNORM	NIGO	5
RXNORM	OBOE-SBC	25
RXNORM	BSAO	2
RXNORM	VSO	4
RXNORM	OMIM	239
RXNORM	VANDF	22056
RXNORM	INO	2
RXNORM	CSSO	1
RXNORM	EP	79
RXNORM	UBERON	7
RXNORM	MFOEM	5
RXNORM	ACGT-MO	32
RXNORM	TOK	1
RXNORM	MIXS	1
RXNORM	MFO	1
RXNORM	CHMO	3
RXNORM	PDO	1
RXNORM	CPT	221
RXNORM	ONL-DP	5
RXNORM	SYN	56
RXNORM	SEP	7
RXNORM	EHDAA2	7
RXNORM	AEO	4
RXNORM	RETO	54
RXNORM	IAO	1
RXNORM	ADW	4
RXNORM	KISAO	1
RXNORM	NPO	123
RXNORM	HP	1
RXNORM	MIRO	4
RXNORM	BNO	4
RXNORM	DIAGONT	1
RXNORM	SWEET	40
RXNORM	SNPO	23
RXNORM	ATMO	2
RXNORM	PORO	7
RXNORM	FMA	71
RXNORM	SYMP	1
RXNORM	CBO	1
RXNORM	CPTH	134
RXNORM	HPIO	8
RXNORM	BAO	46
RXNORM	MA	2
RXNORM	CPRO	5
RXNORM	ICPS	3
RXNORM	suicideo	6
RXNORM	NIFCELL	7
RXNORM	CHEMBIO	2
RXNORM	TAO	5
RXNORM	VSAO	3
RXNORM	OBI_BCGO	11
RXNORM	DCO	1
RXNORM	PROPREO	6
RXNORM	PCO	3
RXNORM	SOPHARM	830
RXNORM	MEDLINEPLUS	168
RXNORM	NDFRT	23300
RXNORM	PHYLONT	1
RXNORM	GO-EXT	11
RXNORM	QIBO	20
RXNORM	SO	22
RXNORM	OBI	43
RXNORM	GCO	1
RXNORM	PDQ	1419
RXNORM	FB-BT	8
RXNORM	IFAR	8
RXNORM	GO	11
RXNORM	BFO	1
RXNORM	MHC	133
RXNORM	ONL-MSA	7
RXNORM	BOF	5
RXNORM	SDO	78
RXNORM	NATPRO	10
RXNORM	ICPC	135
RXNORM	NBO	1
RXNORM	PEDTERM	21
RXNORM	DDANAT	1
RXNORM	JERM	3
RXNORM	PECO	18
RXNORM	PHENX	2
RXNORM	ECG	3
RXNORM	PO	1
SOY	BIOMODELS	1
SOY	RH-MESH	3
SOY	SPTO	1
SOY	MESH	1
SOY	NIFSTD	1
SOY	GRO-CPD	3
SOY	GO-EXT	1
SOY	GO	1
EMAP	RH-MESH	78
EMAP	REXO	47
EMAP	MESH	78
EMAP	NIFSTD	19
EMAP	MIRNAO	19
EMAP	CCO	40
EMAP	GAZ	31
EMAP	RETO	47
EMAP	SNPO	19
EMAP	SOPHARM	19
EMAP	SO	19
VANDF	GEOSPECIES	4
VANDF	TEO	2
VANDF	TMO	7
VANDF	IDO	4
VANDF	FB-CV	9
VANDF	NIFDYS	8
VANDF	SIO	16
VANDF	PSIMOD	3
VANDF	RPO	1
VANDF	BIRNLEX	14
VANDF	OPL	8
VANDF	BP-METADATA	1
VANDF	GFO-BIO	13
VANDF	FHHO	1
VANDF	OGMS	1
VANDF	BRO	4
VANDF	MEDO	1
VANDF	COGAT	2
VANDF	HL7	70
VANDF	COGPO	2
VANDF	AAO	8
VANDF	CANONT	3
VANDF	CCONT	339
VANDF	ONTOKBCF	39
VANDF	EFO	407
VANDF	GENE-CDS	7
VANDF	ICF	2
VANDF	LHN	7
VANDF	VARIO	2
VANDF	OCRE	5
VANDF	NTDO	31
VANDF	GLYCO	2
VANDF	OPB	1
VANDF	PAE	1
VANDF	SPD	1
VANDF	CANCO	5
VANDF	OMRSE	3
VANDF	TRAK	28
VANDF	DDI	1
VANDF	MEDDRA	224
VANDF	NMR	9
VANDF	SuicidO	7
VANDF	TOP-MENELAS	5
VANDF	TGMA	5
VANDF	IXNO	1
VANDF	NDDF	11669
VANDF	MEO	10
VANDF	ICD9CM	136
VANDF	PR	53
VANDF	BIOMODELS	632
VANDF	BDO	15
VANDF	OBIWS	4
VANDF	MAT	1
VANDF	PMR	5
VANDF	SSE	1
VANDF	CHEBI	1271
VANDF	FAO	1
VANDF	QUDT	1
VANDF	ONTODM-CORE	3
[truncated: 52,621 more rows]

## Sheet: Dec15
Source	Target	Weight	SourceSize	TargetSize
ICO	NMR	19	443	479
ICO	PP	3	443	14
ICO	DCO-DEBUGIT	19	443	1728
ICO	OGG	25	443	69688
ICO	BDO	21	443	13816
ICO	ONTODM-KDD	21	443	263
ICO	OMIT	32	443	2226
ICO	TMO	47	443	300
ICO	EHDAA2	5	443	2734
ICO	EPILONT	1	443	137
ICO	COGAT	3	443	1702
ICO	UO	1	443	331
ICO	SIO	41	443	0
ICO	GRO	12	443	1356
ICO	GFO-BIO	10	443	167
ICO	VARIO	1	443	390
ICO	BIOMODELS	33	443	187519
ICO	EHDAA	2	443	2314
ICO	NONRCTO	2	443	155
ICO	PVONTO	14	443	33
ICO	EFO	51	443	17140
ICO	DCM	6	443	3161
ICO	ROO	2	443	1182
ICO	FB-SP	6	443	6599
ICO	DDANAT	1	443	131
ICO	OGG-MM	19	443	69432
ICO	MF	24	443	696
ICO	LIPRO	2	443	309
ICO	CRISP	23	443	9039
ICO	VO	63	443	4536
ICO	EDAM	4	443	3114
ICO	MFOEM	24	443	905
ICO	DCO	3	443	0
ICO	DOID	1	443	9190
ICO	NEOMARK3	4	443	55
ICO	UBERON	4	443	18859
ICO	ACGT-MO	39	443	1769
ICO	ONTOPNEUMO	3	443	1153
ICO	WIKIPATHWAYS	3	443	41
ICO	ATOL	1	443	2098
ICO	NPO	36	443	1903
ICO	QIBO	9	443	0
ICO	HUGO	1	443	32917
ICO	ONLIRA	1	443	0
ICO	suicideo	2	443	289
ICO	GALEN	26	443	23141
ICO	MIXSCV	1	443	519
ICO	CPRO	27	443	135
ICO	OMRSE	33	443	391
ICO	ELIG	4	443	29
ICO	NDFRT	4	443	35018
ICO	REPO	1	443	95
ICO	MP	31	443	11400
ICO	SITBAC	6	443	176
ICO	FLU	91	443	744
ICO	BIM	5	443	121
ICO	CSEO	52	443	20085
ICO	NCCO	7	443	400
ICO	OntoVIP	13	443	3144
ICO	NMOSP	4	443	1414
ICO	ONL-DP	8	443	540
ICO	CCON	3	443	85
ICO	MIXS	2	443	7
ICO	STUFF	2	443	52
ICO	ICPC	4	443	874
ICO	CANONT	2	443	56
ICO	MIRO	23	443	4408
ICO	GFO	6	443	44
ICO	PROPREO	5	443	398
ICO	ICD10CM	4	443	92168
ICO	SOPHARM	61	443	44953
ICO	OPB	4	443	778
ICO	BIRNLEX	38	443	3580
ICO	OOEVV	8	443	47
ICO	RH-MESH	53	443	305349
ICO	APATREATMENT	2	443	480
ICO	NCBITAXON	13	443	906907
ICO	CMPO	8	443	813
ICO	PECO	1	443	561
ICO	CTX	2	443	475
ICO	SNOMEDCT	49	443	316031
ICO	IDOMAL	32	443	2598
ICO	BCGO	5	443	127
ICO	MEDLINEPLUS	7	443	2113
ICO	PDQ	5	443	7871
ICO	NBO	25	443	117307
ICO	MO	6	443	233
ICO	ATC	4	443	6063
ICO	BT	12	443	389
ICO	CNO	23	443	395
ICO	CANCO	29	443	126
ICO	SBO	5	443	632
ICO	SP	25	443	0
ICO	COSTART	4	443	1707
ICO	SNMI	11	443	109150
ICO	SPO	5	443	339
ICO	VHOG	5	443	1185
ICO	CADSRVS	30	443	16616
ICO	ASDPTO	1	443	284
ICO	SDO	45	443	1381
ICO	ICD9CM	4	443	22533
ICO	XAO	5	443	1521
ICO	INO	21	443	446
ICO	STATO	123	443	608
ICO	GEXO	12	443	166325
ICO	OCRE	11	443	388
ICO	NCIT	76	443	113794
ICO	MIRNAO	22	443	676
ICO	GAZ	1	443	0
ICO	PPIO	16	443	5190
ICO	ICD10	4	443	12445
ICO	DIAGONT	2	443	96
ICO	IDO	32	443	506
ICO	CN	1	443	537
ICO	XCO	3	443	487
ICO	PEDTERM	7	443	1771
ICO	IFAR	1	443	4530
ICO	NIFDYS	39	443	2750
ICO	MHC	2	443	7928
ICO	RNAO	24	443	240
ICO	DINTO	4	443	28177
ICO	SCHEMA	3	443	553
ICO	TEO	51	443	685
ICO	APAONTO	10	443	6037
ICO	AERO	60	443	413
ICO	ONTODT	10	443	416
ICO	ICPS	3	443	397
ICO	SAO	22	443	763
ICO	BTO	5	443	5809
ICO	AURA	25	443	27396
ICO	NGSONTO	37	443	90
ICO	REXO	12	443	158308
ICO	TOP-MENELAS	2	443	458
ICO	BCTEO	5	443	253
ICO	MDDB	4	443	13525
ICO	BP	1	443	68
ICO	SYN	35	443	14462
ICO	TRAK	17	443	1619
ICO	PATO	13	443	2457
ICO	BAO	20	443	3340
ICO	OBI	230	443	2921
ICO	FYPO	11	443	8423
ICO	PCO	29	443	1545
ICO	PEO	5	443	142
ICO	NIFSUBCELL	39	443	2800
ICO	AI-RHEUM	4	443	808
ICO	AAO	5	443	0
ICO	ONTOAD	20	443	5899
ICO	SWEET	25	443	4549
ICO	HCPCS	4	443	5810
ICO	SEP	8	443	194
ICO	MESH	25	443	0
ICO	ERO	86	443	3948
ICO	NEOMARK4	19	443	324
ICO	OGSF	47	443	237
ICO	OBOE-SBC	8	443	630
ICO	GFVO	5	443	102
ICO	FIX	1	443	1163
ICO	BFO	22	443	35
ICO	BOF	1	443	186
ICO	MCCV	2	443	16
ICO	BIOMO	41	443	1488
ICO	GPML	1	443	20
ICO	OGMS	31	443	124
ICO	PEAO	8	443	2297
ICO	GO	2	443	43969
ICO	COGPO	49	443	357
ICO	NCRO	34	443	3065
ICO	CCONT	51	443	16541
ICO	ONL-MR-DA	10	443	701
ICO	MS	16	443	5170
ICO	PR	5	443	293512
ICO	TADS	2	443	628
ICO	CTO	9	443	377
ICO	OAE	45	443	5013
ICO	BRIDG	8	443	325
ICO	NDDF	5	443	27574
ICO	CHEBI	6	443	0
ICO	NATPRO	3	443	9462
ICO	EXO	7	443	81
ICO	NIFCELL	39	443	2769
ICO	MFO	2	443	4358
ICO	PIERO	1	443	35
ICO	TOK	4	443	192
ICO	BHO	3	443	543
ICO	STY	4	443	127
ICO	FALL	3	443	49
ICO	CAO	35	443	204
ICO	NEUMORE	14	443	33
ICO	ONL-MSA	12	443	768
ICO	MSTDE-FRE	4	443	1826
ICO	APADISORDERS	2	443	822
ICO	VSAO	5	443	314
ICO	ORTHO	1	443	26
ICO	DIKB	3	443	359
ICO	CABRO	1	443	59
ICO	OMIM	5	443	81820
ICO	EHDA	16	443	8340
ICO	FB-BT	6	443	9422
ICO	HL7	23	443	10309
ICO	RCD	22	443	140065
ICO	TGMA	2	443	1864
ICO	RCTONT	3	443	186
ICO	ALLERGYDETECTOR	1	443	11
ICO	MEDDRA	8	443	66505
ICO	MEO	4	443	783
ICO	RETO	12	443	147807
ICO	ICPC2P	5	443	7537
ICO	MSO	2	443	1172
ICO	MEDO	1	443	83
ICO	GO-EXT	3	443	34400
ICO	BMT	1	443	252
ICO	HRDO	1	443	13539
ICO	EXACT	9	443	162
ICO	VIVO-ISF	45	443	411
ICO	OBIWS	47	443	227
ICO	FBbi	1	443	624
ICO	ICECI	1	443	2231
ICO	HINO	31	443	37765
ICO	HAO	3	443	2349
ICO	GEOSPECIES	5	443	109
ICO	CARELEX	3	443	322
ICO	RADLEX	13	443	46139
ICO	PROVO	4	443	30
ICO	MCCL	3	443	5474
ICO	TRON	2	443	965
ICO	BAO-GPCR	1	443	903
ICO	OPL	30	443	360
ICO	ADW	2	443	362
ICO	CHMO	27	443	2965
ICO	NTDO	13	443	525
ICO	OBIB	201	443	0
ICO	NIFSTD	178	443	110893
ICO	FB-CV	14	443	505
ICO	RB	14	443	0
ICO	ICD10PCS	4	443	178319
ICO	ONTODM-CORE	60	443	777
ICO	OBI_BCGO	185	443	2269
ICO	CLO	52	443	38620
ICO	RNPRIO	2	443	79
ICO	BSAO	2	443	92
ICO	LOINC	59	443	174512
ICO	ONSTR	84	443	1948
ICO	WB-BT	3	443	7235
ICO	JERM	6	443	253
ICO	OBCS	91	443	683
ICO	CHEMINF	70	443	768
ICO	PORO	12	443	750
ICO	ORDO	1	443	12377
ICO	GCO	1	443	4
ICO	DRON	31	443	415303
ICO	CPT	4	443	13218
ICO	RXNO	7	443	774
ICO	MAT	4	443	461
ICO	FB-DV	3	443	226
ICO	MCBCC	1	443	385
ICO	ICNP	15	443	4212
ICO	CL	20	443	4789
ICO	UNITSONT	1	443	63
ICO	ONTOTOXNUC	3	443	649
ICO	DDI	51	443	165
ICO	SPD	1	443	661
ICO	MA	4	443	3229
ICO	LHN	2	443	308
ICO	NIGO	2	443	4835
ICO	PHARE	9	443	228
ICO	VTO	3	443	107134
ICO	BRO	4	443	488
ICO	OGI	22	443	176
ICO	HIVO004	7	443	1109
ICO	IAO	45	443	179
ICO	WHO-ART	4	443	1851
ICO	ECG	33	443	1123
ICO	ADAR	26	443	790
ICO	PMA	5	443	2082
ICO	HEIO	1	443	124
ICO	SNPO	4	443	2207
ICO	ONTOMA	1	443	435
ICO	ENM	22	443	6690
ICO	PATHLEX	1	443	1785
ICO	VSO	26	443	186
ICO	DERMO	1	443	3427
ICO	SHR	1	443	294
ICO	GLYCO	1	443	235
ICO	ROLEO	1	443	673
ICO	CARO	2	443	50
ICO	REX	1	443	552
ICO	CPTAC	1	443	19
ICO	ICD11-BODYSYSTEM	1	443	29
ICO	PMR	4	443	137
ICO	OGDI	31	443	375
ICO	HUPSON	52	443	2919
ICO	APASTATISTICAL	1	443	140
ICO	EDAMTO	1	443	226
ICO	MIM	1	443	87
ICO	FMA	7	443	103902
ICO	IDOBRU	58	443	0
ICO	SO	3	443	2301
ICO	BRCT	1	443	1653
ICO	GO-PLUS	22	443	56448
ICO	MSTDE	4	443	1826
ICO	QUDT	1	443	204
ICO	PLIO	1	443	375
ICO	CBO	4	443	241
ICO	AEO	3	443	250
ICO	CDAO	5	443	143
ICO	TYPON	9	443	44
ICO	SWO	12	443	4067
ICO	EDDA	1	443	205
ICO	IDODEN	34	443	5035
ICO	ZFA	5	443	2996
ICO	IDQA	3	443	259
ICO	APACOMPUTER	1	443	114
ICO	CCO	12	443	277764
ICO	CHEMBIO	2	443	104
ICO	TAO	11	443	3371
ICO	NEMO	48	443	1851
ICO	HPIO	35	443	281
ICO	BCO	47	443	126
ICO	RXNORM	4	443	118555
ICO	VANDF	4	443	25408
ICO	ENVO	2	443	2159
ICO	CTONT	3	443	41
ICO	OVAE	17	443	817
ICO	VIVO	9	443	224
ICO	IMGT-ONTOLOGY	3	443	1412
ICO	EP	23	443	82059
ICO	ADO	31	443	1564
ICO	GMO	5	443	1038
ICO	DIAB	1	443	375
NMR	ICO	19	443	443
NMR	PP	5	443	443
NMR	DCO-DEBUGIT	26	443	443
NMR	OGG	37	443	443
NMR	BDO	13	443	443
NMR	OMIT	22	443	443
NMR	TMO	52	443	443
NMR	COGAT	3	443	443
NMR	SIO	51	443	443
NMR	GRO	11	443	443
NMR	GFO-BIO	10	443	443
NMR	VARIO	2	443	443
NMR	BIOMODELS	29	443	443
NMR	EHDAA	1	443	443
NMR	NONRCTO	1	443	443
NMR	PVONTO	10	443	443
NMR	EFO	18	443	443
NMR	DCM	3	443	443
NMR	ROO	1	443	443
NMR	OGG-MM	36	443	443
NMR	MF	36	443	443
NMR	LIPRO	1	443	443
NMR	CRISP	14	443	443
NMR	VO	39	443	443
NMR	EDAM	4	443	443
NMR	MFOEM	36	443	443
NMR	ACGT-MO	22	443	443
NMR	ONTOPNEUMO	1	443	443
NMR	WIKIPATHWAYS	1	443	443
NMR	NPO	31	443	443
NMR	QIBO	2	443	443
NMR	ONLIRA	1	443	443
NMR	suicideo	1	443	443
NMR	GALEN	20	443	443
NMR	MIXSCV	1	443	443
NMR	CPRO	20	443	443
NMR	OMRSE	21	443	443
NMR	ELIG	2	443	443
NMR	NDFRT	8	443	443
NMR	REPO	1	443	443
NMR	MP	18	443	443
NMR	SITBAC	6	443	443
NMR	FLU	61	443	443
NMR	BIM	2	443	443
NMR	CSEO	62	443	443
NMR	NCCO	5	443	443
NMR	OntoVIP	22	443	443
NMR	ONL-DP	19	443	443
NMR	CCON	1	443	443
NMR	STUFF	9	443	443
NMR	ICPC	7	443	443
NMR	CANONT	2	443	443
NMR	MIRO	50	443	443
NMR	GFO	7	443	443
NMR	PROPREO	6	443	443
NMR	ICD10CM	1	443	443
NMR	SOPHARM	45	443	443
NMR	OPB	2	443	443
NMR	BIRNLEX	29	443	443
NMR	OOEVV	3	443	443
NMR	RH-MESH	24	443	443
NMR	NCBITAXON	1	443	443
NMR	CMPO	2	443	443
NMR	CTX	1	443	443
NMR	SNOMEDCT	42	443	443
NMR	IDOMAL	20	443	443
NMR	BCGO	2	443	443
NMR	MEDLINEPLUS	4	443	443
NMR	PDQ	8	443	443
NMR	NBO	24	443	443
NMR	MO	6	443	443
NMR	ATC	7	443	443
NMR	BT	7	443	443
NMR	CNO	50	443	443
NMR	CANCO	22	443	443
NMR	SBO	2	443	443
NMR	SP	20	443	443
NMR	COSTART	1	443	443
NMR	SNMI	13	443	443
NMR	SPO	5	443	443
NMR	CADSRVS	7	443	443
NMR	SDO	21	443	443
NMR	ICD9CM	7	443	443
NMR	XAO	1	443	443
NMR	INO	20	443	443
NMR	STATO	22	443	443
NMR	GEXO	15	443	443
NMR	OCRE	2	443	443
NMR	NCIT	62	443	443
NMR	MIRNAO	14	443	443
NMR	GAZ	2	443	443
NMR	PPIO	92	443	443
NMR	ICD10	7	443	443
NMR	DIAGONT	3	443	443
NMR	IDO	35	443	443
NMR	XCO	1	443	443
NMR	NIFDYS	28	443	443
NMR	MHC	1	443	443
NMR	RNAO	21	443	443
NMR	DINTO	3	443	443
NMR	TEO	21	443	443
NMR	APAONTO	2	443	443
NMR	AERO	49	443	443
NMR	ONTODT	5	443	443
NMR	ICPS	3	443	443
NMR	SAO	19	443	443
NMR	AURA	23	443	443
NMR	NGSONTO	52	443	443
NMR	REXO	11	443	443
NMR	TOP-MENELAS	3	443	443
NMR	MDDB	7	443	443
NMR	BP	2	443	443
NMR	SYN	12	443	443
NMR	TRAK	17	443	443
NMR	PATO	18	443	443
NMR	BAO	14	443	443
NMR	OBI	71	443	443
NMR	FYPO	6	443	443
NMR	PCO	20	443	443
NMR	PEO	4	443	443
NMR	NIFSUBCELL	67	443	443
NMR	AI-RHEUM	7	443	443
NMR	AAO	1	443	443
NMR	ONTOAD	17	443	443
NMR	SWEET	46	443	443
NMR	HCPCS	1	443	443
NMR	SEP	12	443	443
NMR	MESH	22	443	443
NMR	ERO	86	443	443
NMR	NEOMARK4	10	443	443
NMR	OGSF	37	443	443
NMR	OBOE-SBC	14	443	443
NMR	GFVO	7	443	443
NMR	BFO	20	443	443
NMR	BOF	2	443	443
NMR	BIOMO	20	443	443
NMR	GPML	1	443	443
NMR	OGMS	35	443	443
NMR	PEAO	9	443	443
NMR	GO	1	443	443
NMR	COGPO	39	443	443
NMR	NCRO	51	443	443
NMR	CCONT	18	443	443
NMR	ONL-MR-DA	18	443	443
NMR	MS	92	443	443
NMR	PR	5	443	443
NMR	CTO	1	443	443
NMR	OAE	24	443	443
NMR	BRIDG	1	443	443
NMR	NDDF	8	443	443
NMR	CHEBI	17	443	443
NMR	NATPRO	3	443	443
NMR	EXO	7	443	443
NMR	NIFCELL	28	443	443
NMR	PIERO	3	443	443
NMR	TOK	2	443	443
NMR	BHO	1	443	443
NMR	STY	7	443	443
NMR	FALL	4	443	443
NMR	CAO	23	443	443
NMR	NEUMORE	10	443	443
NMR	ONL-MSA	15	443	443
NMR	MSTDE-FRE	1	443	443
NMR	VSAO	3	443	443
NMR	ORTHO	2	443	443
NMR	DIKB	2	443	443
NMR	CABRO	1	443	443
NMR	OMIM	7	443	443
NMR	EHDA	4	443	443
NMR	FB-BT	5	443	443
NMR	HL7	23	443	443
NMR	RCD	31	443	443
NMR	RCTONT	3	443	443
NMR	MEDDRA	9	443	443
NMR	RETO	11	443	443
NMR	ICPC2P	1	443	443
NMR	MEDO	1	443	443
NMR	GO-EXT	1	443	443
NMR	EXACT	7	443	443
NMR	VIVO-ISF	32	443	443
NMR	OBIWS	25	443	443
NMR	HINO	24	443	443
NMR	HAO	1	443	443
NMR	GEOSPECIES	2	443	443
NMR	RADLEX	10	443	443
NMR	PROVO	2	443	443
NMR	MCCL	1	443	443
NMR	BAO-GPCR	1	443	443
NMR	OPL	20	443	443
NMR	ADW	1	443	443
NMR	CHMO	20	443	443
NMR	NTDO	8	443	443
NMR	OBIB	38	443	443
NMR	NIFSTD	181	443	443
NMR	FB-CV	15	443	443
NMR	RB	7	443	443
NMR	ICD10PCS	7	443	443
NMR	ONTODM-CORE	24	443	443
NMR	OBI_BCGO	50	443	443
NMR	CLO	21	443	443
NMR	LOINC	38	443	443
NMR	ONSTR	40	443	443
NMR	WB-BT	1	443	443
NMR	JERM	9	443	443
NMR	OBCS	23	443	443
NMR	CHEMINF	61	443	443
NMR	PORO	10	443	443
NMR	DRON	29	443	443
NMR	CPT	3	443	443
NMR	RXNO	5	443	443
NMR	MAT	1	443	443
NMR	FB-DV	1	443	443
NMR	MCBCC	1	443	443
NMR	ICNP	4	443	443
NMR	CL	10	443	443
NMR	ONTOTOXNUC	5	443	443
NMR	DDI	22	443	443
NMR	LHN	1	443	443
NMR	PHARE	5	443	443
NMR	BRO	6	443	443
NMR	OGI	36	443	443
NMR	HIVO004	4	443	443
NMR	IAO	36	443	443
NMR	WHO-ART	7	443	443
NMR	ECG	29	443	443
NMR	ADAR	50	443	443
NMR	PMA	1	443	443
NMR	SNPO	2	443	443
NMR	ENM	32	443	443
NMR	VSO	37	443	443
NMR	SHR	1	443	443
NMR	GLYCO	3	443	443
NMR	ROLEO	3	443	443
NMR	CARO	1	443	443
NMR	REX	1	443	443
NMR	PMR	1	443	443
NMR	OGDI	27	443	443
NMR	HUPSON	80	443	443
NMR	MIM	2	443	443
NMR	FMA	5	443	443
NMR	IDOBRU	37	443	443
NMR	SO	1	443	443
NMR	GO-PLUS	8	443	443
NMR	MSTDE	1	443	443
NMR	PLIO	2	443	443
NMR	CBO	1	443	443
NMR	CDAO	2	443	443
NMR	TYPON	7	443	443
NMR	SWO	15	443	443
NMR	IDODEN	20	443	443
NMR	IDQA	1	443	443
NMR	CCO	12	443	443
NMR	CHEMBIO	2	443	443
NMR	TAO	4	443	443
NMR	NEMO	25	443	443
NMR	HPIO	21	443	443
NMR	BCO	18	443	443
NMR	RXNORM	9	443	443
NMR	VANDF	8	443	443
NMR	ENVO	1	443	443
NMR	OVAE	28	443	443
NMR	VIVO	3	443	443
NMR	IMGT-ONTOLOGY	2	443	443
NMR	EP	14	443	443
NMR	ADO	21	443	443
NMR	GMO	7	443	443
NMR	DIAB	1	443	443
NMR	MWLA	1	443	443
NMR	CARRE	1	443	443
NMR	XEO	1	443	443
NMR	MPATH	1	443	443
NMR	FAO	1	443	443
NMR	CYTO	1	443	443
NMR	RPO	1	443	443
NMR	MAMO	2	443	443
NMR	TEDDY	1	443	443
NMR	PSIMOD	1	443	443
PP	ICO	3	443	443
PP	NMR	5	443	443
PP	DCO-DEBUGIT	2	443	443
PP	OGG	2	443	443
PP	BDO	5	443	443
PP	OMIT	3	443	443
PP	TMO	3	443	443
PP	SIO	4	443	443
PP	GRO	1	443	443
PP	GFO-BIO	1	443	443
PP	BIOMODELS	3	443	443
PP	EFO	1	443	443
PP	DCM	1	443	443
PP	ROO	1	443	443
PP	OGG-MM	2	443	443
PP	MF	2	443	443
PP	CRISP	1	443	443
PP	VO	3	443	443
PP	EDAM	3	443	443
PP	MFOEM	2	443	443
PP	ACGT-MO	3	443	443
PP	WIKIPATHWAYS	1	443	443
PP	NPO	3	443	443
PP	suicideo	1	443	443
PP	CPRO	4	443	443
PP	OMRSE	4	443	443
PP	NDFRT	1	443	443
PP	MP	3	443	443
PP	SITBAC	3	443	443
PP	FLU	4	443	443
PP	BIM	1	443	443
PP	CSEO	4	443	443
PP	NCCO	2	443	443
PP	OntoVIP	2	443	443
PP	ONL-DP	1	443	443
PP	ICPC	1	443	443
PP	MIRO	3	443	443
PP	GFO	1	443	443
PP	PROPREO	1	443	443
PP	ICD10CM	1	443	443
PP	SOPHARM	7	443	443
PP	OPB	1	443	443
PP	BIRNLEX	4	443	443
PP	NCBITAXON	2	443	443
PP	SNOMEDCT	5	443	443
PP	IDOMAL	3	443	443
PP	BCGO	2	443	443
PP	MEDLINEPLUS	2	443	443
PP	PDQ	1	443	443
PP	NBO	1	443	443
PP	ATC	1	443	443
PP	BT	1	443	443
PP	CNO	5	443	443
PP	CANCO	3	443	443
PP	SP	3	443	443
PP	COSTART	1	443	443
PP	SNMI	4	443	443
PP	SPO	3	443	443
PP	CADSRVS	1	443	443
PP	SDO	4	443	443
PP	ICD9CM	1	443	443
PP	INO	3	443	443
PP	STATO	3	443	443
PP	GEXO	1	443	443
PP	OCRE	2	443	443
PP	NCIT	7	443	443
PP	MIRNAO	2	443	443
PP	PPIO	1	443	443
PP	ICD10	1	443	443
PP	IDO	3	443	443
PP	CN	1	443	443
PP	NIFDYS	5	443	443
PP	RNAO	3	443	443
PP	TEO	6	443	443
PP	AERO	5	443	443
PP	ICPS	3	443	443
PP	SAO	4	443	443
PP	AURA	5	443	443
PP	NGSONTO	3	443	443
PP	REXO	1	443	443
PP	TOP-MENELAS	2	443	443
PP	MDDB	1	443	443
PP	BP	1	443	443
PP	SYN	2	443	443
PP	TRAK	2	443	443
PP	PATO	1	443	443
PP	OBI	4	443	443
PP	PCO	3	443	443
PP	NIFSUBCELL	5	443	443
PP	AI-RHEUM	1	443	443
PP	ONTOAD	1	443	443
PP	SWEET	7	443	443
PP	HCPCS	1	443	443
PP	SEP	1	443	443
PP	MESH	1	443	443
PP	ERO	7	443	443
PP	NEOMARK4	3	443	443
PP	OGSF	2	443	443
PP	OBOE-SBC	2	443	443
PP	BFO	2	443	443
PP	BIOMO	4	443	443
PP	OGMS	2	443	443
PP	PEAO	14	443	443
PP	COGPO	4	443	443
PP	NCRO	3	443	443
PP	CCONT	1	443	443
PP	ONL-MR-DA	1	443	443
PP	MS	1	443	443
PP	OAE	3	443	443
PP	BRIDG	1	443	443
PP	NDDF	1	443	443
PP	NIFCELL	5	443	443
PP	STY	1	443	443
PP	FALL	2	443	443
PP	CAO	3	443	443
PP	ONL-MSA	1	443	443
PP	MSTDE-FRE	1	443	443
PP	DIKB	1	443	443
PP	OMIM	1	443	443
PP	HL7	8	443	443
PP	RCD	2	443	443
PP	RCTONT	3	443	443
PP	MEDDRA	1	443	443
PP	RETO	1	443	443
PP	ICPC2P	1	443	443
PP	VIVO-ISF	2	443	443
PP	OBIWS	3	443	443
PP	HINO	3	443	443
PP	RADLEX	1	443	443
PP	PROVO	1	443	443
PP	OPL	4	443	443
PP	CHMO	1	443	443
PP	NTDO	1	443	443
PP	OBIB	3	443	443
PP	NIFSTD	12	443	443
PP	FB-CV	2	443	443
PP	ICD10PCS	1	443	443
PP	ONTODM-CORE	6	443	443
PP	OBI_BCGO	4	443	443
PP	CLO	3	443	443
PP	LOINC	2	443	443
PP	ONSTR	2	443	443
PP	JERM	1	443	443
PP	OBCS	3	443	443
PP	CHEMINF	6	443	443
PP	PORO	1	443	443
PP	ORDO	1	443	443
PP	DRON	4	443	443
PP	CPT	1	443	443
PP	ICNP	2	443	443
PP	CL	1	443	443
PP	DDI	4	443	443
PP	BRO	1	443	443
PP	OGI	2	443	443
PP	IAO	3	443	443
PP	WHO-ART	1	443	443
PP	ECG	4	443	443
PP	ADAR	3	443	443
PP	SNPO	2	443	443
PP	ENM	2	443	443
PP	VSO	4	443	443
PP	GLYCO	1	443	443
PP	OGDI	6	443	443
PP	HUPSON	5	443	443
PP	MIM	1	443	443
PP	FMA	1	443	443
PP	IDOBRU	2	443	443
PP	SO	1	443	443
PP	MSTDE	1	443	443
PP	PLIO	1	443	443
PP	CBO	1	443	443
PP	TYPON	3	443	443
PP	SWO	3	443	443
PP	IDODEN	3	443	443
PP	CCO	1	443	443
PP	CHEMBIO	1	443	443
PP	NEMO	3	443	443
PP	HPIO	4	443	443
PP	BCO	4	443	443
PP	RXNORM	1	443	443
PP	VANDF	1	443	443
PP	OVAE	2	443	443
PP	IMGT-ONTOLOGY	1	443	443
PP	EP	4	443	443
PP	ADO	4	443	443
PP	GMO	1	443	443
PP	DIDEO	6	443	443
PP	ANCESTRO	1	443	443
PP	SSE	1	443	443
PP	ODNAE	2	443	443
PP	PDO_CAS	1	443	443
PP	WSIO	2	443	443
PP	EO	2	443	443
PP	FIRE	1	443	443
PP	NIHSS	1	443	443
DCO-DEBUGIT	ICO	19	443	443
DCO-DEBUGIT	NMR	26	443	443
DCO-DEBUGIT	PP	2	443	443
DCO-DEBUGIT	OGG	17	443	443
DCO-DEBUGIT	BDO	66	443	443
DCO-DEBUGIT	ONTODM-KDD	3	443	443
DCO-DEBUGIT	OMIT	28	443	443
DCO-DEBUGIT	TMO	25	443	443
DCO-DEBUGIT	EHDAA2	43	443	443
DCO-DEBUGIT	EPILONT	2	443	443
DCO-DEBUGIT	COGAT	5	443	443
DCO-DEBUGIT	UO	18	443	443
DCO-DEBUGIT	SIO	48	443	443
DCO-DEBUGIT	GRO	1	443	443
DCO-DEBUGIT	GFO-BIO	19	443	443
DCO-DEBUGIT	VARIO	2	443	443
DCO-DEBUGIT	BIOMODELS	261	443	443
DCO-DEBUGIT	EHDAA	46	443	443
DCO-DEBUGIT	NONRCTO	3	443	443
DCO-DEBUGIT	PVONTO	10	443	443
DCO-DEBUGIT	EFO	179	443	443
DCO-DEBUGIT	DCM	12	443	443
DCO-DEBUGIT	ROO	73	443	443
DCO-DEBUGIT	FB-SP	3	443	443
DCO-DEBUGIT	DDANAT	1	443	443
DCO-DEBUGIT	OGG-MM	10	443	443
DCO-DEBUGIT	MF	12	443	443
DCO-DEBUGIT	LIPRO	1	443	443
DCO-DEBUGIT	CRISP	238	443	443
DCO-DEBUGIT	VO	40	443	443
DCO-DEBUGIT	EDAM	10	443	443
DCO-DEBUGIT	MFOEM	13	443	443
DCO-DEBUGIT	DCO	2	443	443
DCO-DEBUGIT	DOID	111	443	443
DCO-DEBUGIT	NEOMARK3	4	443	443
DCO-DEBUGIT	UBERON	93	443	443
DCO-DEBUGIT	ACGT-MO	85	443	443
DCO-DEBUGIT	ONTOPNEUMO	28	443	443
DCO-DEBUGIT	WIKIPATHWAYS	6	443	443
DCO-DEBUGIT	ATOL	2	443	443
DCO-DEBUGIT	NPO	48	443	443
DCO-DEBUGIT	QIBO	29	443	443
DCO-DEBUGIT	HUGO	1	443	443
DCO-DEBUGIT	suicideo	5	443	443
DCO-DEBUGIT	GALEN	336	443	443
DCO-DEBUGIT	MIXSCV	6	443	443
DCO-DEBUGIT	CPRO	18	443	443
DCO-DEBUGIT	OMRSE	15	443	443
DCO-DEBUGIT	ELIG	2	443	443
DCO-DEBUGIT	NDFRT	145	443	443
DCO-DEBUGIT	REPO	1	443	443
DCO-DEBUGIT	MP	23	443	443
DCO-DEBUGIT	SITBAC	9	443	443
DCO-DEBUGIT	FLU	32	443	443
DCO-DEBUGIT	BIM	4	443	443
DCO-DEBUGIT	CSEO	180	443	443
DCO-DEBUGIT	NCCO	23	443	443
DCO-DEBUGIT	OntoVIP	56	443	443
DCO-DEBUGIT	ONL-DP	16	443	443
DCO-DEBUGIT	CCON	4	443	443
DCO-DEBUGIT	MIXS	1	443	443
DCO-DEBUGIT	STUFF	4	443	443
DCO-DEBUGIT	ICPC	46	443	443
DCO-DEBUGIT	CANONT	4	443	443
DCO-DEBUGIT	MIRO	11	443	443
DCO-DEBUGIT	GFO	6	443	443
DCO-DEBUGIT	PROPREO	3	443	443
DCO-DEBUGIT	ICD10CM	51	443	443
DCO-DEBUGIT	SOPHARM	154	443	443
DCO-DEBUGIT	OPB	7	443	443
DCO-DEBUGIT	BIRNLEX	38	443	443
DCO-DEBUGIT	OOEVV	1	443	443
DCO-DEBUGIT	RH-MESH	754	443	443
DCO-DEBUGIT	APATREATMENT	2	443	443
DCO-DEBUGIT	NCBITAXON	61	443	443
DCO-DEBUGIT	CMPO	11	443	443
DCO-DEBUGIT	CTX	13	443	443
DCO-DEBUGIT	SNOMEDCT	656	443	443
DCO-DEBUGIT	IDOMAL	53	443	443
DCO-DEBUGIT	BCGO	7	443	443
DCO-DEBUGIT	MEDLINEPLUS	73	443	443
DCO-DEBUGIT	PDQ	94	443	443
DCO-DEBUGIT	NBO	254	443	443
DCO-DEBUGIT	MO	10	443	443
DCO-DEBUGIT	ATC	255	443	443
DCO-DEBUGIT	BT	395	443	443
DCO-DEBUGIT	CNO	14	443	443
DCO-DEBUGIT	CANCO	12	443	443
DCO-DEBUGIT	SBO	112	443	443
DCO-DEBUGIT	SP	18	443	443
DCO-DEBUGIT	COSTART	91	443	443
DCO-DEBUGIT	SNMI	189	443	443
DCO-DEBUGIT	SPO	3	443	443
DCO-DEBUGIT	VHOG	44	443	443
DCO-DEBUGIT	CADSRVS	306	443	443
DCO-DEBUGIT	ASDPTO	5	443	443
DCO-DEBUGIT	SDO	76	443	443
DCO-DEBUGIT	ICD9CM	61	443	443
DCO-DEBUGIT	XAO	42	443	443
DCO-DEBUGIT	INO	6	443	443
DCO-DEBUGIT	STATO	16	443	443
DCO-DEBUGIT	GEXO	14	443	443
DCO-DEBUGIT	OCRE	10	443	443
DCO-DEBUGIT	NCIT	455	443	443
DCO-DEBUGIT	MIRNAO	11	443	443
DCO-DEBUGIT	GAZ	6	443	443
DCO-DEBUGIT	PPIO	36	443	443
DCO-DEBUGIT	ICD10	50	443	443
DCO-DEBUGIT	DIAGONT	2	443	443
DCO-DEBUGIT	IDO	15	443	443
DCO-DEBUGIT	CN	3	443	443
DCO-DEBUGIT	XCO	3	443	443
DCO-DEBUGIT	PEDTERM	54	443	443
DCO-DEBUGIT	IFAR	55	443	443
DCO-DEBUGIT	NIFDYS	44	443	443
DCO-DEBUGIT	MHC	3	443	443
DCO-DEBUGIT	RNAO	10	443	443
DCO-DEBUGIT	DINTO	129	443	443
DCO-DEBUGIT	SCHEMA	15	443	443
DCO-DEBUGIT	TEO	38	443	443
DCO-DEBUGIT	APAONTO	65	443	443
DCO-DEBUGIT	AERO	25	443	443
DCO-DEBUGIT	ONTODT	5	443	443
DCO-DEBUGIT	ICPS	11	443	443
DCO-DEBUGIT	SAO	12	443	443
DCO-DEBUGIT	BTO	64	443	443
DCO-DEBUGIT	AURA	132	443	443
DCO-DEBUGIT	NGSONTO	12	443	443
DCO-DEBUGIT	REXO	14	443	443
DCO-DEBUGIT	TOP-MENELAS	7	443	443
DCO-DEBUGIT	BCTEO	7	443	443
DCO-DEBUGIT	MDDB	33	443	443
DCO-DEBUGIT	BP	1	443	443
DCO-DEBUGIT	SYN	143	443	443
DCO-DEBUGIT	TRAK	43	443	443
DCO-DEBUGIT	PATO	24	443	443
DCO-DEBUGIT	BAO	45	443	443
DCO-DEBUGIT	OBI	43	443	443
DCO-DEBUGIT	FYPO	35	443	443
DCO-DEBUGIT	PCO	12	443	443
DCO-DEBUGIT	PEO	7	443	443
DCO-DEBUGIT	NIFSUBCELL	44	443	443
DCO-DEBUGIT	AI-RHEUM	39	443	443
DCO-DEBUGIT	ONTOAD	79	443	443
DCO-DEBUGIT	SWEET	70	443	443
DCO-DEBUGIT	HCPCS	33	443	443
DCO-DEBUGIT	SEP	8	443	443
DCO-DEBUGIT	MESH	319	443	443
DCO-DEBUGIT	ERO	27	443	443
DCO-DEBUGIT	NEOMARK4	6	443	443
DCO-DEBUGIT	OGSF	12	443	443
DCO-DEBUGIT	OBOE-SBC	30	443	443
DCO-DEBUGIT	GFVO	10	443	443
DCO-DEBUGIT	FIX	3	443	443
DCO-DEBUGIT	BFO	8	443	443
DCO-DEBUGIT	BOF	6	443	443
DCO-DEBUGIT	BIOMO	48	443	443
DCO-DEBUGIT	GPML	2	443	443
DCO-DEBUGIT	OGMS	10	443	443
DCO-DEBUGIT	PEAO	5	443	443
DCO-DEBUGIT	GO	31	443	443
DCO-DEBUGIT	COGPO	13	443	443
DCO-DEBUGIT	NCRO	22	443	443
DCO-DEBUGIT	CCONT	182	443	443
DCO-DEBUGIT	ONL-MR-DA	19	443	443
DCO-DEBUGIT	MS	36	443	443
DCO-DEBUGIT	PR	8	443	443
DCO-DEBUGIT	TADS	4	443	443
DCO-DEBUGIT	CTO	5	443	443
DCO-DEBUGIT	OAE	82	443	443
DCO-DEBUGIT	BRIDG	4	443	443
DCO-DEBUGIT	NDDF	93	443	443
DCO-DEBUGIT	CHEBI	145	443	443
DCO-DEBUGIT	NATPRO	64	443	443
DCO-DEBUGIT	EXO	11	443	443
DCO-DEBUGIT	NIFCELL	43	443	443
DCO-DEBUGIT	MFO	14	443	443
DCO-DEBUGIT	PIERO	3	443	443
DCO-DEBUGIT	TOK	3	443	443
DCO-DEBUGIT	BHO	35	443	443
DCO-DEBUGIT	STY	33	443	443
DCO-DEBUGIT	FALL	5	443	443
DCO-DEBUGIT	CAO	11	443	443
DCO-DEBUGIT	NEUMORE	10	443	443
DCO-DEBUGIT	ONL-MSA	19	443	443
DCO-DEBUGIT	MSTDE-FRE	39	443	443
DCO-DEBUGIT	APADISORDERS	21	443	443
DCO-DEBUGIT	VSAO	11	443	443
DCO-DEBUGIT	ORTHO	2	443	443
DCO-DEBUGIT	DIKB	2	443	443
DCO-DEBUGIT	CABRO	2	443	443
DCO-DEBUGIT	OMIM	100	443	443
DCO-DEBUGIT	EHDA	246	443	443
DCO-DEBUGIT	FB-BT	26	443	443
DCO-DEBUGIT	HL7	101	443	443
DCO-DEBUGIT	RCD	370	443	443
DCO-DEBUGIT	TGMA	9	443	443
DCO-DEBUGIT	RCTONT	4	443	443
DCO-DEBUGIT	ALLERGYDETECTOR	1	443	443
DCO-DEBUGIT	MEDDRA	160	443	443
DCO-DEBUGIT	MEO	52	443	443
DCO-DEBUGIT	RETO	14	443	443
DCO-DEBUGIT	ICPC2P	98	443	443
DCO-DEBUGIT	MSO	13	443	443
DCO-DEBUGIT	MEDO	1	443	443
DCO-DEBUGIT	GO-EXT	10	443	443
DCO-DEBUGIT	BMT	2	443	443
DCO-DEBUGIT	HRDO	3	443	443
DCO-DEBUGIT	EXACT	4	443	443
DCO-DEBUGIT	VIVO-ISF	24	443	443
DCO-DEBUGIT	OBIWS	6	443	443
DCO-DEBUGIT	ICECI	1	443	443
DCO-DEBUGIT	HINO	17	443	443
DCO-DEBUGIT	HAO	21	443	443
DCO-DEBUGIT	GEOSPECIES	4	443	443
DCO-DEBUGIT	CARELEX	3	443	443
DCO-DEBUGIT	RADLEX	142	443	443
DCO-DEBUGIT	PROVO	4	443	443
DCO-DEBUGIT	MCCL	47	443	443
DCO-DEBUGIT	TRON	12	443	443
DCO-DEBUGIT	BAO-GPCR	4	443	443
DCO-DEBUGIT	OPL	21	443	443
DCO-DEBUGIT	ADW	7	443	443
DCO-DEBUGIT	CHMO	7	443	443
DCO-DEBUGIT	NTDO	396	443	443
DCO-DEBUGIT	OBIB	28	443	443
DCO-DEBUGIT	NIFSTD	267	443	443
DCO-DEBUGIT	FB-CV	17	443	443
DCO-DEBUGIT	RB	19	443	443
DCO-DEBUGIT	ICD10PCS	33	443	443
DCO-DEBUGIT	ONTODM-CORE	18	443	443
DCO-DEBUGIT	OBI_BCGO	81	443	443
DCO-DEBUGIT	CLO	10	443	443
DCO-DEBUGIT	BSAO	5	443	443
DCO-DEBUGIT	LOINC	592	443	443
DCO-DEBUGIT	ONSTR	41	443	443
DCO-DEBUGIT	WB-BT	18	443	443
DCO-DEBUGIT	JERM	12	443	443
DCO-DEBUGIT	OBCS	14	443	443
DCO-DEBUGIT	CHEMINF	20	443	443
DCO-DEBUGIT	PORO	14	443	443
DCO-DEBUGIT	ORDO	3	443	443
DCO-DEBUGIT	GCO	2	443	443
DCO-DEBUGIT	DRON	282	443	443
DCO-DEBUGIT	CPT	39	443	443
DCO-DEBUGIT	RXNO	3	443	443
DCO-DEBUGIT	MAT	42	443	443
DCO-DEBUGIT	MCBCC	8	443	443
DCO-DEBUGIT	ICNP	89	443	443
DCO-DEBUGIT	CL	63	443	443
DCO-DEBUGIT	UNITSONT	5	443	443
DCO-DEBUGIT	ONTOTOXNUC	17	443	443
DCO-DEBUGIT	DDI	10	443	443
DCO-DEBUGIT	SPD	11	443	443
DCO-DEBUGIT	MA	66	443	443
DCO-DEBUGIT	LHN	6	443	443
DCO-DEBUGIT	NIGO	10	443	443
DCO-DEBUGIT	PHARE	26	443	443
DCO-DEBUGIT	VTO	1	443	443
DCO-DEBUGIT	BRO	1	443	443
DCO-DEBUGIT	OGI	11	443	443
DCO-DEBUGIT	HIVO004	48	443	443
DCO-DEBUGIT	IAO	9	443	443
DCO-DEBUGIT	WHO-ART	65	443	443
DCO-DEBUGIT	ECG	19	443	443
DCO-DEBUGIT	ADAR	15	443	443
DCO-DEBUGIT	PMA	30	443	443
DCO-DEBUGIT	HEIO	1	443	443
DCO-DEBUGIT	SNPO	9	443	443
DCO-DEBUGIT	ONTOMA	2	443	443
DCO-DEBUGIT	ENM	35	443	443
DCO-DEBUGIT	PATHLEX	10	443	443
DCO-DEBUGIT	VSO	23	443	443
DCO-DEBUGIT	DERMO	4	443	443
DCO-DEBUGIT	SHR	12	443	443
DCO-DEBUGIT	GLYCO	2	443	443
DCO-DEBUGIT	ROLEO	5	443	443
DCO-DEBUGIT	CARO	4	443	443
DCO-DEBUGIT	REX	1	443	443
DCO-DEBUGIT	ICD11-BODYSYSTEM	9	443	443
DCO-DEBUGIT	PMR	10	443	443
DCO-DEBUGIT	OGDI	20	443	443
DCO-DEBUGIT	HUPSON	106	443	443
DCO-DEBUGIT	EDAMTO	2	443	443
DCO-DEBUGIT	MIM	1	443	443
DCO-DEBUGIT	FMA	92	443	443
DCO-DEBUGIT	IDOBRU	35	443	443
DCO-DEBUGIT	SO	4	443	443
DCO-DEBUGIT	BRCT	3	443	443
DCO-DEBUGIT	GO-PLUS	1607	443	443
DCO-DEBUGIT	MSTDE	39	443	443
DCO-DEBUGIT	QUDT	1	443	443
DCO-DEBUGIT	PLIO	2	443	443
DCO-DEBUGIT	CBO	4	443	443
DCO-DEBUGIT	AEO	16	443	443
DCO-DEBUGIT	TYPON	2	443	443
DCO-DEBUGIT	SWO	16	443	443
DCO-DEBUGIT	IDODEN	39	443	443
DCO-DEBUGIT	ZFA	28	443	443
DCO-DEBUGIT	IDQA	2	443	443
DCO-DEBUGIT	CCO	22	443	443
DCO-DEBUGIT	CHEMBIO	1	443	443
DCO-DEBUGIT	TAO	42	443	443
DCO-DEBUGIT	NEMO	31	443	443
DCO-DEBUGIT	HPIO	27	443	443
DCO-DEBUGIT	BCO	9	443	443
DCO-DEBUGIT	RXNORM	166	443	443
DCO-DEBUGIT	VANDF	149	443	443
DCO-DEBUGIT	ENVO	11	443	443
DCO-DEBUGIT	CTONT	1	443	443
DCO-DEBUGIT	OVAE	9	443	443
DCO-DEBUGIT	VIVO	9	443	443
DCO-DEBUGIT	IMGT-ONTOLOGY	4	443	443
DCO-DEBUGIT	EP	140	443	443
DCO-DEBUGIT	ADO	34	443	443
DCO-DEBUGIT	GMO	8	443	443
DCO-DEBUGIT	DIAB	19	443	443
DCO-DEBUGIT	DIDEO	30	443	443
DCO-DEBUGIT	SMASH	5	443	443
DCO-DEBUGIT	BNO	1	443	443
DCO-DEBUGIT	MWLA	1	443	443
DCO-DEBUGIT	CARRE	4	443	443
DCO-DEBUGIT	XEO	3	443	443
DCO-DEBUGIT	ANCESTRO	1	443	443
DCO-DEBUGIT	SSE	19	443	443
DCO-DEBUGIT	ODNAE	62	443	443
DCO-DEBUGIT	ONTOKBCF	12	443	443
DCO-DEBUGIT	SEDI	3	443	443
DCO-DEBUGIT	FHHO	3	443	443
DCO-DEBUGIT	DERMLEX	27	443	443
DCO-DEBUGIT	SSO	18	443	443
DCO-DEBUGIT	PDO_CAS	7	443	443
DCO-DEBUGIT	MPATH	10	443	443
DCO-DEBUGIT	CSO	1	443	443
DCO-DEBUGIT	PTS	4	443	443
DCO-DEBUGIT	CHD	1	443	443
DCO-DEBUGIT	GENE-CDS	1	443	443
DCO-DEBUGIT	ECP	2	443	443
DCO-DEBUGIT	TRANS	4	443	443
DCO-DEBUGIT	PHENX	3	443	443
DCO-DEBUGIT	OPE	3	443	443
DCO-DEBUGIT	ONTOLURGENCES	12	443	443
DCO-DEBUGIT	GBM	8	443	443
DCO-DEBUGIT	TRIAGE	2	443	443
DCO-DEBUGIT	ADMIN	4	443	443
DCO-DEBUGIT	EMO	3	443	443
DCO-DEBUGIT	RPO	37	443	443
DCO-DEBUGIT	WSIO	1	443	443
DCO-DEBUGIT	GLYCORDF	1	443	443
DCO-DEBUGIT	SYMP	36	443	443
DCO-DEBUGIT	EO	9	443	443
DCO-DEBUGIT	SURGICAL	2	443	443
DCO-DEBUGIT	NLMVS	17	443	443
DCO-DEBUGIT	CSSO	29	443	443
DCO-DEBUGIT	PDO	15	443	443
DCO-DEBUGIT	HP	43	443	443
DCO-DEBUGIT	CTCAE	29	443	443
DCO-DEBUGIT	DOCCC	4	443	443
DCO-DEBUGIT	NMOBR	5	443	443
DCO-DEBUGIT	AMINO-ACID	1	443	443
DCO-DEBUGIT	PDON	2	443	443
DCO-DEBUGIT	APANEUROCLUSTER	12	443	443
DCO-DEBUGIT	PO	1	443	443
DCO-DEBUGIT	FIRE	2	443	443
DCO-DEBUGIT	PAE	1	443	443
DCO-DEBUGIT	VT	1	443	443
DCO-DEBUGIT	CMO	6	443	443
DCO-DEBUGIT	ZEA	2	443	443
DCO-DEBUGIT	GRO-CPGA	1	443	443
DCO-DEBUGIT	TM-SIGNS-AND-SYMPTS	8	443	443
DCO-DEBUGIT	OGMD	2	443	443
DCO-DEBUGIT	MMO	1	443	443
OGG	ICO	25	443	443
OGG	NMR	37	443	443
OGG	PP	2	443	443
OGG	DCO-DEBUGIT	17	443	443
OGG	BDO	235	443	443
OGG	OMIT	483	443	443
OGG	TMO	20	443	443
OGG	EHDAA2	1	443	443
OGG	COGAT	3	443	443
OGG	UO	1	443	443
OGG	SIO	30	443	443
OGG	GRO	2	443	443
OGG	GFO-BIO	11	443	443
OGG	VARIO	1	443	443
OGG	BIOMODELS	37	443	443
OGG	EHDAA	2	443	443
OGG	PVONTO	10	443	443
OGG	EFO	41	443	443
OGG	DCM	3	443	443
OGG	ROO	5	443	443
OGG	OGG-MM	17081	443	443
OGG	MF	35	443	443
OGG	CRISP	22	443	443
OGG	VO	258	443	443
OGG	EDAM	32	443	443
OGG	MFOEM	36	443	443
OGG	NEOMARK3	1	443	443
OGG	ACGT-MO	26	443	443
OGG	ONTOPNEUMO	12	443	443
OGG	WIKIPATHWAYS	2	443	443
OGG	NPO	20	443	443
OGG	QIBO	6	443	443
OGG	HUGO	1	443	443
OGG	suicideo	5	443	443
OGG	GALEN	42	443	443
OGG	MIXSCV	4	443	443
OGG	CPRO	21	443	443
OGG	OMRSE	24	443	443
OGG	NDFRT	11	443	443
OGG	MP	24	443	443
OGG	SITBAC	4	443	443
OGG	FLU	24	443	443
OGG	BIM	2	443	443
OGG	CSEO	42	443	443
OGG	NCCO	6	443	443
OGG	OntoVIP	8	443	443
OGG	NMOSP	2	443	443
OGG	ONL-DP	4	443	443
OGG	CCON	1	443	443
OGG	STUFF	2	443	443
OGG	ICPC	3	443	443
OGG	CANONT	3	443	443
OGG	MIRO	26	443	443
OGG	GFO	7	443	443
OGG	PROPREO	1	443	443
OGG	ICD10CM	3	443	443
OGG	SOPHARM	64	443	443
OGG	OPB	1	443	443
OGG	BIRNLEX	28	443	443
OGG	OOEVV	2	443	443
OGG	RH-MESH	122	443	443
OGG	NCBITAXON	70	443	443
OGG	CMPO	1	443	443
OGG	CTX	3	443	443
OGG	SNOMEDCT	137	443	443
OGG	IDOMAL	30	443	443
OGG	BCGO	2	443	443
OGG	MEDLINEPLUS	8	443	443
OGG	PDQ	57	443	443
OGG	NBO	39	443	443
OGG	MO	1	443	443
OGG	ATC	2	443	443
OGG	BT	12	443	443
OGG	CNO	20	443	443
OGG	CANCO	21	443	443
OGG	SBO	4	443	443
OGG	SP	13	443	443
OGG	COSTART	6	443	443
OGG	SNMI	33	443	443
OGG	SPO	4	443	443
OGG	CADSRVS	64	443	443
OGG	SDO	24	443	443
OGG	ICD9CM	3	443	443
OGG	XAO	1	443	443
OGG	INO	21	443	443
OGG	STATO	25	443	443
OGG	GEXO	33254	443	443
OGG	OCRE	4	443	443
OGG	NCIT	101	443	443
OGG	MIRNAO	20	443	443
OGG	GAZ	429	443	443
OGG	PPIO	18	443	443
OGG	ICD10	2	443	443
OGG	IDO	40	443	443
OGG	CN	12	443	443
OGG	PEDTERM	5	443	443
OGG	IFAR	1	443	443
OGG	NIFDYS	29	443	443
OGG	MHC	49	443	443
OGG	RNAO	20	443	443
OGG	DINTO	30	443	443
OGG	SCHEMA	2	443	443
OGG	TEO	57	443	443
OGG	APAONTO	8	443	443
OGG	AERO	43	443	443
OGG	ONTODT	3	443	443
OGG	ICPS	1	443	443
OGG	SAO	21	443	443
OGG	BTO	6	443	443
OGG	AURA	50	443	443
OGG	NGSONTO	21	443	443
OGG	REXO	32289	443	443
OGG	TOP-MENELAS	6	443	443
OGG	BCTEO	1	443	443
OGG	MDDB	2	443	443
OGG	BP	3	443	443
OGG	SYN	32	443	443
OGG	TRAK	14	443	443
OGG	PATO	9	443	443
OGG	BAO	18	443	443
OGG	OBI	45	443	443
OGG	FYPO	8	443	443
OGG	PCO	22	443	443
OGG	PEO	3	443	443
OGG	NIFSUBCELL	28	443	443
OGG	AI-RHEUM	3	443	443
OGG	AAO	1	443	443
OGG	ONTOAD	14	443	443
OGG	SWEET	43	443	443
OGG	HCPCS	2	443	443
OGG	SEP	6	443	443
OGG	MESH	76	443	443
OGG	ERO	48	443	443
OGG	NEOMARK4	10	443	443
OGG	OGSF	43	443	443
OGG	OBOE-SBC	6	443	443
OGG	GFVO	6	443	443
OGG	BFO	20	443	443
OGG	BOF	2	443	443
OGG	BIOMO	29	443	443
OGG	GPML	8	443	443
OGG	OGMS	35	443	443
OGG	PEAO	5	443	443
OGG	GO	1	443	443
OGG	COGPO	40	443	443
OGG	NCRO	483	443	443
OGG	CCONT	43	443	443
OGG	ONL-MR-DA	5	443	443
OGG	MS	18	443	443
OGG	PR	80	443	443
OGG	CTO	2	443	443
OGG	OAE	23	443	443
OGG	NDDF	12	443	443
OGG	CHEBI	30	443	443
OGG	NATPRO	3	443	443
OGG	EXO	1	443	443
OGG	NIFCELL	28	443	443
OGG	PIERO	2	443	443
OGG	TOK	1	443	443
OGG	BHO	2	443	443
OGG	STY	2	443	443
OGG	FALL	3	443	443
OGG	CAO	22	443	443
OGG	NEUMORE	10	443	443
OGG	ONL-MSA	4	443	443
OGG	MSTDE-FRE	2	443	443
OGG	APADISORDERS	1	443	443
OGG	VSAO	2	443	443
OGG	ORTHO	3	443	443
OGG	DIKB	10	443	443
OGG	CABRO	2	443	443
OGG	OMIM	7	443	443
OGG	EHDA	7	443	443
OGG	FB-BT	6	443	443
OGG	HL7	51	443	443
OGG	RCD	93	443	443
OGG	TGMA	6	443	443
OGG	RCTONT	1	443	443
OGG	MEDDRA	44	443	443
OGG	MEO	7	443	443
OGG	RETO	31082	443	443
OGG	ICPC2P	7	443	443
OGG	MSO	198	443	443
OGG	MEDO	1	443	443
OGG	GO-EXT	1	443	443
OGG	BMT	1	443	443
OGG	HRDO	7	443	443
OGG	EXACT	8	443	443
OGG	VIVO-ISF	25	443	443
OGG	OBIWS	17	443	443
OGG	FBbi	7	443	443
OGG	HINO	210	443	443
OGG	HAO	5	443	443
OGG	GEOSPECIES	4	443	443
OGG	RADLEX	11	443	443
OGG	PROVO	3	443	443
OGG	MCCL	938	443	443
OGG	TRON	3	443	443
OGG	OPL	22	443	443
OGG	ADW	1	443	443
OGG	CHMO	11	443	443
OGG	NTDO	13	443	443
OGG	OBIB	44	443	443
OGG	NIFSTD	280	443	443
OGG	FB-CV	9	443	443
OGG	RB	7	443	443
OGG	ICD10PCS	2	443	443
OGG	ONTODM-CORE	50	443	443
OGG	OBI_BCGO	55	443	443
OGG	CLO	29	443	443
OGG	BSAO	1	443	443
OGG	LOINC	329	443	443
OGG	ONSTR	40	443	443
OGG	WB-BT	64	443	443
OGG	JERM	4	443	443
OGG	OBCS	25	443	443
OGG	CHEMINF	62	443	443
OGG	PORO	10	443	443
OGG	ORDO	12	443	443
OGG	GCO	2	443	443
OGG	DRON	44	443	443
OGG	CPT	2	443	443
OGG	RXNO	3	443	443
OGG	FB-DV	1	443	443
OGG	MCBCC	50	443	443
OGG	ICNP	13	443	443
OGG	CL	9	443	443
OGG	UNITSONT	1	443	443
OGG	ONTOTOXNUC	17	443	443
OGG	DDI	21	443	443
OGG	SPD	2	443	443
OGG	LHN	3	443	443
OGG	PHARE	6	443	443
OGG	VTO	21	443	443
OGG	BRO	2	443	443
OGG	OGI	40	443	443
OGG	HIVO004	32	443	443
OGG	IAO	35	443	443
OGG	WHO-ART	3	443	443
OGG	ECG	26	443	443
OGG	ADAR	20	443	443
OGG	PMA	2	443	443
OGG	SNPO	21	443	443
OGG	ENM	35	443	443
OGG	VSO	36	443	443
OGG	DERMO	3	443	443
OGG	SHR	6	443	443
OGG	ROLEO	3	443	443
OGG	REX	1	443	443
OGG	PMR	1	443	443
OGG	OGDI	30	443	443
OGG	HUPSON	45	443	443
OGG	EDAMTO	1	443	443
OGG	MIM	3	443	443
OGG	FMA	4	443	443
OGG	IDOBRU	713	443	443
OGG	SO	20	443	443
OGG	BRCT	3	443	443
OGG	GO-PLUS	25	443	443
OGG	MSTDE	2	443	443
OGG	PLIO	2	443	443
OGG	CDAO	1	443	443
OGG	TYPON	8	443	443
OGG	SWO	59	443	443
OGG	IDODEN	27	443	443
OGG	ZFA	13	443	443
OGG	IDQA	2	443	443
OGG	CCO	29725	443	443
OGG	CHEMBIO	3	443	443
OGG	TAO	12	443	443
OGG	NEMO	23	443	443
OGG	HPIO	23	443	443
OGG	BCO	18	443	443
OGG	RXNORM	16	443	443
OGG	VANDF	13	443	443
OGG	ENVO	14	443	443
OGG	OVAE	35	443	443
OGG	VIVO	3	443	443
OGG	IMGT-ONTOLOGY	12	443	443
OGG	EP	16	443	443
OGG	ADO	192	443	443
OGG	GMO	6	443	443
OGG	DIAB	1	443	443
OGG	DIDEO	35	443	443
OGG	SMASH	3	443	443
OGG	BNO	1	443	443
OGG	XEO	4	443	443
OGG	ANCESTRO	4	443	443
OGG	ODNAE	15	443	443
OGG	ONTOKBCF	15	443	443
OGG	DERMLEX	4	443	443
OGG	SSO	2	443	443
OGG	TTO	8	443	443
OGG	PDO_CAS	11	443	443
OGG	PHYLONT	4	443	443
OGG	APO	1	443	443
OGG	MPATH	3	443	443
OGG	CHD	4	443	443
OGG	GENE-CDS	69	443	443
OGG	CYTO	162	443	443
OGG	RPO	1	443	443
OGG	SYMP	1	443	443
OGG	TEDDY	1	443	443
OGG	NLMVS	1	443	443
OGG	CSSO	1	443	443
OGG	HP	3	443	443
OGG	DOCCC	1	443	443
OGG	AMINO-ACID	1	443	443
OGG	PDON	2	443	443
OGG	WB-PHENOTYPE	1	443	443
OGG	APANEUROCLUSTER	1	443	443
OGG	PO	2	443	443
OGG	PAE	2	443	443
OGG	RS	15	443	443
OGG	GRO-CPGA	2	443	443
OGG	BHN	3	443	443
BDO	ICO	21	443	443
BDO	NMR	13	443	443
BDO	PP	5	443	443
BDO	DCO-DEBUGIT	66	443	443
BDO	OGG	235	443	443
BDO	ONTODM-KDD	1	443	443
BDO	OMIT	18	443	443
BDO	TMO	28	443	443
BDO	EHDAA2	6	443	443
BDO	EPILONT	5	443	443
BDO	COGAT	10	443	443
BDO	UO	16	443	443
BDO	SIO	64	443	443
BDO	GRO	2	443	443
BDO	GFO-BIO	9	443	443
BDO	VARIO	11	443	443
BDO	BIOMODELS	2326	443	443
BDO	EHDAA	33	443	443
BDO	NONRCTO	1	443	443
BDO	PVONTO	6	443	443
BDO	EFO	694	443	443
BDO	DCM	29	443	443
BDO	ROO	34	443	443
BDO	OGG-MM	215	443	443
BDO	MF	34	443	443
BDO	LIPRO	1	443	443
BDO	CRISP	433	443	443
BDO	VO	36	443	443
BDO	EDAM	10	443	443
BDO	MFOEM	36	443	443
BDO	DCO	1	443	443
BDO	DOID	649	443	443
BDO	NEOMARK3	1	443	443
BDO	UBERON	44	443	443
BDO	ACGT-MO	103	443	443
BDO	ONTOPNEUMO	18	443	443
BDO	WIKIPATHWAYS	4	443	443
BDO	ATOL	21	443	443
BDO	NPO	104	443	443
BDO	QIBO	34	443	443
BDO	HUGO	21	443	443
BDO	ONLIRA	3	443	443
BDO	suicideo	27	443	443
BDO	GALEN	637	443	443
BDO	MIXSCV	26	443	443
BDO	CPRO	24	443	443
BDO	OMRSE	19	443	443
BDO	ELIG	1	443	443
BDO	NDFRT	5	443	443
BDO	REPO	5	443	443
BDO	MP	1450	443	443
BDO	SITBAC	3	443	443
BDO	FLU	59	443	443
BDO	BIM	2	443	443
BDO	CSEO	956	443	443
BDO	NCCO	21	443	443
BDO	OntoVIP	179	443	443
BDO	ONL-DP	11	443	443
BDO	CCON	1	443	443
BDO	STUFF	3	443	443
BDO	ICPC	44	443	443
BDO	CANONT	12	443	443
BDO	MIRO	14	443	443
BDO	GFO	6	443	443
BDO	PROPREO	4	443	443
BDO	ICD10CM	413	443	443
BDO	SOPHARM	1310	443	443
BDO	OPB	13	443	443
BDO	BIRNLEX	78	443	443
BDO	OOEVV	7	443	443
BDO	RH-MESH	2490	443	443
BDO	NCBITAXON	22	443	443
BDO	CMPO	133	443	443
BDO	CTX	222	443	443
BDO	SNOMEDCT	1898	443	443
BDO	IDOMAL	28	443	443
BDO	BCGO	14	443	443
BDO	MEDLINEPLUS	250	443	443
BDO	PDQ	64	443	443
BDO	NBO	2374	443	443
BDO	MO	11	443	443
BDO	ATC	3	443	443
BDO	BT	12	443	443
BDO	CNO	36	443	443
BDO	CANCO	17	443	443
BDO	SBO	15	443	443
BDO	SP	11	443	443
BDO	COSTART	344	443	443
BDO	SNMI	723	443	443
BDO	SPO	10	443	443
BDO	VHOG	4	443	443
BDO	CADSRVS	2845	443	443
BDO	ASDPTO	15	443	443
BDO	SDO	65	443	443
BDO	ICD9CM	319	443	443
BDO	XAO	10	443	443
BDO	INO	19	443	443
BDO	STATO	21	443	443
BDO	GEXO	565	443	443
BDO	OCRE	17	443	443
BDO	NCIT	1399	443	443
BDO	MIRNAO	13	443	443
BDO	GAZ	33	443	443
BDO	PPIO	2274	443	443
BDO	ICD10	317	443	443
BDO	IDO	24	443	443
BDO	CN	2	443	443
BDO	XCO	2	443	443
BDO	PEDTERM	242	443	443
BDO	IFAR	995	443	443
BDO	NIFDYS	2373	443	443
BDO	MHC	4	443	443
BDO	RNAO	13	443	443
BDO	DINTO	22	443	443
BDO	SCHEMA	9	443	443
BDO	TEO	52	443	443
BDO	APAONTO	187	443	443
BDO	AERO	50	443	443
BDO	ONTODT	12	443	443
BDO	ICPS	3	443	443
BDO	SAO	41	443	443
BDO	BTO	8	443	443
BDO	AURA	104	443	443
BDO	NGSONTO	13	443	443
BDO	REXO	562	443	443
BDO	TOP-MENELAS	24	443	443
BDO	BCTEO	13	443	443
BDO	MDDB	3	443	443
BDO	BP	4	443	443
BDO	SYN	34	443	443
BDO	TRAK	151	443	443
BDO	PATO	2298	443	443
BDO	BAO	113	443	443
BDO	OBI	82	443	443
BDO	FYPO	141	443	443
BDO	PCO	26	443	443
BDO	PEO	5	443	443
BDO	NIFSUBCELL	2332	443	443
BDO	AI-RHEUM	52	443	443
BDO	AAO	5	443	443
BDO	ONTOAD	97	443	443
BDO	SWEET	135	443	443
BDO	HCPCS	4	443	443
BDO	SEP	8	443	443
BDO	MESH	916	443	443
BDO	ERO	38	443	443
BDO	NEOMARK4	12	443	443
BDO	OGSF	23	443	443
BDO	OBOE-SBC	34	443	443
BDO	GFVO	9	443	443
BDO	FIX	4	443	443
BDO	BFO	13	443	443
BDO	BOF	2	443	443
BDO	MCCV	1	443	443
BDO	BIOMO	64	443	443
BDO	GPML	1	443	443
BDO	OGMS	20	443	443
BDO	PEAO	8	443	443
BDO	GO	76	443	443
BDO	COGPO	30	443	443
BDO	NCRO	19	443	443
BDO	CCONT	695	443	443
BDO	ONL-MR-DA	11	443	443
BDO	MS	2274	443	443
BDO	PR	66	443	443
BDO	TADS	3	443	443
BDO	CTO	15	443	443
BDO	OAE	55	443	443
BDO	BRIDG	1	443	443
BDO	NDDF	6	443	443
BDO	CHEBI	2	443	443
BDO	NATPRO	541	443	443
BDO	EXO	9	443	443
BDO	NIFCELL	2331	443	443
BDO	MFO	10	443	443
BDO	PIERO	2	443	443
BDO	TOK	6	443	443
BDO	BHO	46	443	443
BDO	STY	3	443	443
BDO	FALL	3	443	443
BDO	CAO	16	443	443
BDO	NEUMORE	6	443	443
BDO	ONL-MSA	17	443	443
BDO	MSTDE-FRE	31	443	443
BDO	APADISORDERS	135	443	443
BDO	VSAO	9	443	443
BDO	ORTHO	4	443	443
BDO	DIKB	6	443	443
BDO	OMIM	4221	443	443
BDO	EHDA	191	443	443
BDO	FB-BT	19	443	443
BDO	HL7	171	443	443
BDO	RCD	1317	443	443
BDO	TGMA	5	443	443
BDO	RCTONT	1	443	443
BDO	ALLERGYDETECTOR	1	443	443
BDO	MEDDRA	1504	443	443
BDO	MEO	6	443	443
BDO	RETO	550	443	443
BDO	ICPC2P	472	443	443
BDO	MSO	46	443	443
BDO	MEDO	1	443	443
BDO	GO-EXT	20	443	443
BDO	HRDO	226	443	443
BDO	EXACT	2	443	443
BDO	VIVO-ISF	44	443	443
BDO	OBIWS	12	443	443
BDO	FBbi	4	443	443
BDO	ICECI	1	443	443
BDO	HINO	22	443	443
BDO	HAO	11	443	443
BDO	GEOSPECIES	1	443	443
BDO	RADLEX	491	443	443
BDO	PROVO	2	443	443
BDO	MCCL	77	443	443
BDO	TRON	5	443	443
BDO	BAO-GPCR	7	443	443
BDO	OPL	20	443	443
BDO	ADW	13	443	443
BDO	CHMO	11	443	443
BDO	NTDO	17	443	443
BDO	OBIB	42	443	443
BDO	NIFSTD	3219	443	443
BDO	FB-CV	108	443	443
BDO	RB	19	443	443
BDO	ICD10PCS	3	443	443
BDO	ONTODM-CORE	37	443	443
BDO	OBI_BCGO	116	443	443
BDO	CLO	153	443	443
BDO	RNPRIO	1	443	443
BDO	BSAO	1	443	443
BDO	LOINC	525	443	443
BDO	ONSTR	103	443	443
BDO	WB-BT	6	443	443
BDO	JERM	18	443	443
BDO	OBCS	31	443	443
BDO	CHEMINF	56	443	443
BDO	PORO	37	443	443
BDO	ORDO	555	443	443
BDO	DRON	24	443	443
BDO	CPT	6	443	443
BDO	RXNO	2	443	443
BDO	MAT	3	443	443
BDO	FB-DV	2	443	443
BDO	MCBCC	13	443	443
BDO	ICNP	118	443	443
BDO	CL	73	443	443
BDO	UNITSONT	6	443	443
BDO	ONTOTOXNUC	6	443	443
BDO	DDI	25	443	443
BDO	SPD	3	443	443
BDO	MA	10	443	443
BDO	LHN	9	443	443
BDO	NIGO	13	443	443
BDO	PHARE	19	443	443
BDO	VTO	2	443	443
BDO	OGI	19	443	443
BDO	HIVO004	7	443	443
BDO	IAO	24	443	443
BDO	WHO-ART	302	443	443
BDO	ECG	39	443	443
BDO	ADAR	26	443	443
BDO	PMA	18	443	443
BDO	HEIO	1	443	443
BDO	SNPO	21	443	443
BDO	ONTOMA	1	443	443
BDO	ENM	79	443	443
BDO	PATHLEX	20	443	443
BDO	VSO	32	443	443
BDO	DERMO	121	443	443
BDO	SHR	27	443	443
BDO	GLYCO	8	443	443
BDO	CARO	3	443	443
BDO	REX	4	443	443
BDO	ICD11-BODYSYSTEM	1	443	443
BDO	PMR	4	443	443
BDO	OGDI	29	443	443
BDO	HUPSON	1399	443	443
BDO	MIM	4	443	443
BDO	FMA	38	443	443
BDO	IDOBRU	31	443	443
BDO	SO	12	443	443
BDO	BRCT	2	443	443
BDO	GO-PLUS	50	443	443
BDO	MSTDE	31	443	443
BDO	QUDT	11	443	443
BDO	PLIO	9	443	443
BDO	CBO	9	443	443
BDO	AEO	3	443	443
BDO	CDAO	6	443	443
BDO	TYPON	9	443	443
BDO	SWO	14	443	443
BDO	EDDA	1	443	443
BDO	IDODEN	37	443	443
BDO	ZFA	23	443	443
BDO	IDQA	6	443	443
BDO	CCO	471	443	443
BDO	CHEMBIO	5	443	443
BDO	TAO	18	443	443
BDO	NEMO	59	443	443
BDO	HPIO	37	443	443
BDO	BCO	20	443	443
BDO	RXNORM	5	443	443
BDO	VANDF	6	443	443
BDO	ENVO	7	443	443
BDO	CTONT	1	443	443
BDO	OVAE	12	443	443
BDO	VIVO	2	443	443
BDO	IMGT-ONTOLOGY	7	443	443
BDO	EP	2422	443	443
BDO	ADO	61	443	443
BDO	GMO	21	443	443
BDO	DIAB	236	443	443
BDO	DIDEO	26	443	443
BDO	SMASH	4	443	443
BDO	MWLA	1	443	443
BDO	ATO	1	443	443
BDO	CARRE	14	443	443
BDO	XEO	16	443	443
BDO	ANCESTRO	1	443	443
BDO	SSE	65	443	443
BDO	ODNAE	23	443	443
BDO	ONTOKBCF	21	443	443
BDO	FHHO	37	443	443
BDO	DERMLEX	212	443	443
BDO	SSO	45	443	443
BDO	RSA	1	443	443
BDO	MERA	1	443	443
BDO	PDO_CAS	22	443	443
BDO	PHYLONT	3	443	443
BDO	APO	17	443	443
BDO	MPATH	115	443	443
BDO	CHD	6	443	443
BDO	GENE-CDS	1	443	443
BDO	PHENX	19	443	443
BDO	SOY	6	443	443
BDO	OPE	8	443	443
BDO	CYTO	7	443	443
BDO	RPO	467	443	443
BDO	SYMP	173	443	443
BDO	TEDDY	2	443	443
BDO	NLMVS	168	443	443
BDO	PTRANS	20	443	443
BDO	BSPO	1	443	443
BDO	CSSO	92	443	443
BDO	PDO	49	443	443
BDO	HP	26453	443	443
BDO	CTCAE	191	443	443
BDO	DOCCC	13	443	443
BDO	AMINO-ACID	6	443	443
BDO	PDON	42	443	443
BDO	WB-PHENOTYPE	4	443	443
BDO	APAEDUCLUSTER	19	443	443
BDO	APANEUROCLUSTER	49	443	443
BDO	IXNO	1	443	443
BDO	PO	2	443	443
BDO	FIRE	1	443	443
BDO	SPTO	5	443	443
BDO	PAE	2	443	443
BDO	RS	2	443	443
BDO	VT	2	443	443
BDO	PTO	19	443	443
BDO	FO	1	443	443
BDO	CMO	4	443	443
BDO	ZEA	1	443	443
BDO	GRO-CPGA	2	443	443
BDO	InterNano	1	443	443
BDO	EOL	1	443	443
BDO	TM-SIGNS-AND-SYMPTS	35	443	443
BDO	OGMD	10	443	443
ONTODM-KDD	ICO	21	443	443
ONTODM-KDD	DCO-DEBUGIT	3	443	443
ONTODM-KDD	BDO	1	443	443
ONTODM-KDD	TMO	19	443	443
ONTODM-KDD	EPILONT	1	443	443
ONTODM-KDD	COGAT	1	443	443
ONTODM-KDD	SIO	11	443	443
ONTODM-KDD	GRO	1	443	443
ONTODM-KDD	BIOMODELS	1	443	443
ONTODM-KDD	PVONTO	1	443	443
ONTODM-KDD	EFO	6	443	443
ONTODM-KDD	DCM	1	443	443
ONTODM-KDD	MF	2	443	443
ONTODM-KDD	LIPRO	2	443	443
ONTODM-KDD	CRISP	1	443	443
ONTODM-KDD	VO	10	443	443
ONTODM-KDD	EDAM	2	443	443
ONTODM-KDD	MFOEM	2	443	443
ONTODM-KDD	ACGT-MO	4	443	443
ONTODM-KDD	WIKIPATHWAYS	1	443	443
ONTODM-KDD	NPO	2	443	443
ONTODM-KDD	HUGO	1	443	443
ONTODM-KDD	ONLIRA	1	443	443
ONTODM-KDD	suicideo	1	443	443
ONTODM-KDD	GALEN	2	443	443
ONTODM-KDD	CPRO	1	443	443
ONTODM-KDD	OMRSE	1	443	443
ONTODM-KDD	REPO	1	443	443
ONTODM-KDD	SITBAC	1	443	443
ONTODM-KDD	FLU	21	443	443
ONTODM-KDD	BIM	3	443	443
ONTODM-KDD	CSEO	2	443	443
ONTODM-KDD	NCCO	1	443	443
ONTODM-KDD	OntoVIP	5	443	443
ONTODM-KDD	ONL-DP	5	443	443
ONTODM-KDD	MIXS	1	443	443
ONTODM-KDD	MIRO	1	443	443
ONTODM-KDD	GFO	1	443	443
ONTODM-KDD	SOPHARM	6	443	443
ONTODM-KDD	OPB	1	443	443
ONTODM-KDD	BIRNLEX	7	443	443
ONTODM-KDD	OOEVV	1	443	443
ONTODM-KDD	RH-MESH	2	443	443
ONTODM-KDD	SNOMEDCT	3	443	443
ONTODM-KDD	IDOMAL	1	443	443
ONTODM-KDD	MO	1	443	443
ONTODM-KDD	BT	1	443	443
ONTODM-KDD	CNO	2	443	443
ONTODM-KDD	CANCO	2	443	443
ONTODM-KDD	SP	3	443	443
ONTODM-KDD	ASDPTO	1	443	443
ONTODM-KDD	SDO	2	443	443
ONTODM-KDD	INO	1	443	443
ONTODM-KDD	STATO	18	443	443
ONTODM-KDD	GEXO	1	443	443
ONTODM-KDD	OCRE	3	443	443
ONTODM-KDD	NCIT	15	443	443
ONTODM-KDD	IDO	1	443	443
ONTODM-KDD	CN	2	443	443
ONTODM-KDD	PEDTERM	1	443	443
ONTODM-KDD	NIFDYS	1	443	443
ONTODM-KDD	MHC	1	443	443
ONTODM-KDD	DINTO	3	443	443
ONTODM-KDD	SCHEMA	4	443	443
ONTODM-KDD	TEO	20	443	443
ONTODM-KDD	APAONTO	2	443	443
ONTODM-KDD	AERO	20	443	443
ONTODM-KDD	ONTODT	3	443	443
ONTODM-KDD	ICPS	1	443	443
ONTODM-KDD	AURA	4	443	443
ONTODM-KDD	NGSONTO	7	443	443
ONTODM-KDD	REXO	1	443	443
ONTODM-KDD	SYN	7	443	443
ONTODM-KDD	TRAK	2	443	443
ONTODM-KDD	BAO	1	443	443
ONTODM-KDD	OBI	31	443	443
ONTODM-KDD	PCO	1	443	443
ONTODM-KDD	PEO	1	443	443
ONTODM-KDD	NIFSUBCELL	1	443	443
ONTODM-KDD	ONTOAD	2	443	443
ONTODM-KDD	SWEET	8	443	443
ONTODM-KDD	SEP	1	443	443
ONTODM-KDD	MESH	1	443	443
ONTODM-KDD	ERO	16	443	443
ONTODM-KDD	NEOMARK4	3	443	443
ONTODM-KDD	OGSF	11	443	443
ONTODM-KDD	OBOE-SBC	1	443	443
ONTODM-KDD	BIOMO	11	443	443
ONTODM-KDD	OGMS	3	443	443
ONTODM-KDD	COGPO	21	443	443
ONTODM-KDD	CCONT	6	443	443
ONTODM-KDD	ONL-MR-DA	5	443	443
ONTODM-KDD	OAE	3	443	443
ONTODM-KDD	BRIDG	2	443	443
ONTODM-KDD	NIFCELL	1	443	443
ONTODM-KDD	TOK	4	443	443
ONTODM-KDD	BHO	1	443	443
ONTODM-KDD	CAO	9	443	443
ONTODM-KDD	NEUMORE	1	443	443
ONTODM-KDD	ONL-MSA	6	443	443
ONTODM-KDD	DIKB	3	443	443
ONTODM-KDD	HL7	7	443	443
ONTODM-KDD	RCD	2	443	443
ONTODM-KDD	ALLERGYDETECTOR	1	443	443
ONTODM-KDD	MEDDRA	1	443	443
ONTODM-KDD	RETO	1	443	443
ONTODM-KDD	BMT	1	443	443
ONTODM-KDD	EXACT	1	443	443
ONTODM-KDD	VIVO-ISF	15	443	443
ONTODM-KDD	OBIWS	12	443	443
ONTODM-KDD	ICECI	1	443	443
ONTODM-KDD	HINO	1	443	443
ONTODM-KDD	GEOSPECIES	2	443	443
ONTODM-KDD	CARELEX	1	443	443
ONTODM-KDD	RADLEX	3	443	443
ONTODM-KDD	PROVO	1	443	443
ONTODM-KDD	MCCL	1	443	443
ONTODM-KDD	BAO-GPCR	1	443	443
ONTODM-KDD	OPL	1	443	443
ONTODM-KDD	CHMO	5	443	443
ONTODM-KDD	NTDO	1	443	443
ONTODM-KDD	OBIB	24	443	443
ONTODM-KDD	NIFSTD	40	443	443
ONTODM-KDD	ONTODM-CORE	38	443	443
ONTODM-KDD	OBI_BCGO	20	443	443
ONTODM-KDD	CLO	8	443	443
ONTODM-KDD	RNPRIO	1	443	443
ONTODM-KDD	LOINC	6	443	443
ONTODM-KDD	ONSTR	13	443	443
ONTODM-KDD	JERM	3	443	443
ONTODM-KDD	OBCS	21	443	443
ONTODM-KDD	CHEMINF	21	443	443
ONTODM-KDD	DRON	1	443	443
ONTODM-KDD	RXNO	2	443	443
ONTODM-KDD	ICNP	1	443	443
ONTODM-KDD	ONTOTOXNUC	1	443	443
ONTODM-KDD	DDI	20	443	443
ONTODM-KDD	LHN	1	443	443
ONTODM-KDD	PHARE	2	443	443
[truncated: 96,862 more rows]

## Sheet: README
The files in this folder contain number of mappings between pairs of ontologies for different versions of graphs in OntoCloud.
Columns:
Source - the source ontology
Target - the target ontology
Weight - number of mappings between the source and the target ontology
The November 2015 file contains the following two additional columns:
SourceSize - number of classes in the source ontology
TargetSize - number of classes in the target ontology
For any questions please contact: skocbek at gmail dot com
